# Supplementary material for: Artificial Intelligence That Predicts Sensitizing Potential of Cosmetic Ingredients with Accuracy Comparable to Animal and In Vitro Tests—How Does the Infotechnomics Compare to Other “Omics” in the Cosmetics Safety Assessment?
Source: MDPI journal article supplement (doi:10.3390/ijms24076801), 2023-04-06
Supplement: s1 [file s1]

Table S1. Summary of patch test studies in patients with ACD.

| Name of ingredient    | Concentration (%) | Base | Occlusion (h) | Time to evaluate reactions | Application system                                                  | N    | n | n (%) | Source |
|-----------------------|-------------------|------|---------------|----------------------------|---------------------------------------------------------------------|------|---|-------|--------|
| Alpha-isomethylionone | 10                | Pet. | 48            | 48                         | Finn Chambers on Scanpor tape                                       | 422  | 9 | 2.10  | [1]    |
| Ammylcinnamyl alcohol | 2                 | Pet. | 48            | 48, 72, 96, 168            | Finn Chambers (8 mm), applied on the back with Scanpor tape         | 1503 | 1 | 0.10  | [2]    |
|                       | 2                 | Pet. | 48            | 48, 96                     | Finn Chambers applied on the back                                   | 312  | 1 | 0.30  | [3]    |
|                       | 2                 | Pet. | 48            | 48, 72, 96, 168            | Finn Chambers (8 mm), applied on the upper aspect of the back       | 254  | 1 | 0.40  | [4]    |
| Amylcinnamaldehyde    | 2                 | Pet. | 48            | n/a                        | TRUE Test and Finn Chambers                                         | 3119 | 3 | 0.10  | [5]    |
|                       | 1                 | Pet. | 48            | 48, 72, 96, 168            | Finn Chambers (8 mm), applied on the back with Scanpor tape         | 1503 | 3 | 0.20  | [2]    |
|                       | 2                 | Pet. | 48            | 48, 96                     | Finn Chambers applied on the back                                   | 312  | 1 | 0.30  | [3]    |
|                       | 2                 | Pet. | 48            | 48, 96                     | Finn Chambers applied on Scanpor tape to the upper back of patients | 308  | 2 | 0.60  | [6]    |
|                       | 5                 | Pet. | 48            | 48, 120                    | Finn Chambers secured to the skin with Scanpor tape                 | 178  | 4 | 2.30  | [7]    |

|                       |     |      |        |                 |                                                                                                       |      |    |      |      |
|-----------------------|-----|------|--------|-----------------|-------------------------------------------------------------------------------------------------------|------|----|------|------|
| Anise alcohol         |     |      |        |                 | applied to the upper back                                                                             |      |    |      |      |
|                       | 2   | Pet. | 48     | 48, 72, 96      | Van der Bend patch test chambers applied on the back with Micropore and fixed with Fixomull and Mefix | 940  | 30 | 3.20 | [8]  |
|                       | 2   | Pet. | 48     | n/a             | n/a                                                                                                   | 59   | 2  | 3.40 | [9]  |
|                       | 1   | Pet. | 48     | 72, 96          | n/a                                                                                                   | 405  | 18 | 4.40 | [10] |
|                       | 1   | Pet. | 24, 36 | 72              | n/a                                                                                                   | 2004 | 1  | 0.05 | [11] |
|                       | 1   | Pet. | 48     | 48, 72, 96, 168 | Finn Chambers (8 mm), applied on the back with Scanpor tape                                           | 1503 | 1  | 0.10 | [2]  |
|                       | 1   | Pet. | 48     | 72, 96          | n/a                                                                                                   | 986  | 1  | 0.10 | [12] |
|                       | 1   | Pet. | 48     | 48, 96          | Finn Chambers applied on Scanpor tape to the upper back of patients                                   | 308  | 2  | 0.60 | [6]  |
|                       | 5   | Pet. | 48     | 48, 120         | Finn Chambers (8 mm), applied on the upper back with Scanpor tape                                     | 167  | 3  | 1.80 | [13] |
|                       | 0.1 | Aq.  | 48     | 48, 96          | Komory IQ Chambers Chemotechnique Diagnostics                                                         | 405  | 2  | 0.49 | [14] |
| Benzalkonium chloride | 0.1 | Pet. | 48     | 72, 96          | Curatest Lohman&Rauscher, Rengsdorf Germany                                                           | 1927 | 13 | 0.67 | [15] |
|                       | 0.1 | Pet. | 48     | 48, 96          | n/a                                                                                                   | 385  | 5  | 1.30 | [16] |

|     |      |        |                 |                                                                                                                              |        |     |      |      |
|-----|------|--------|-----------------|------------------------------------------------------------------------------------------------------------------------------|--------|-----|------|------|
| 0.1 | Aq.  | 48     | 48, 96          | Finn Chambers applied on Scanpor tape to the upper back of patients                                                          | 308    | 5   | 1.62 | [6]  |
| 0.1 | Pet  | 24, 48 | 72              | Finn Chambers (8 mm) on Scan-por (19 departments), Leukotest, Hal, Curatest, Haye, Intradex Service BV, Alphen aan den Rijn, | 11 308 | 207 | 1.83 | [17] |
| 0.1 | Pet. | 24, 48 | 72, 96          | n/a                                                                                                                          | 893    | 17  | 1.90 | [18] |
| 0.1 | Aq.  | 48     | 48, 72, 96, 168 | Finn Chambers (8 mm), applied on the upper back with Scanpor tape                                                            | 4892   | 210 | 4.29 | [19] |
| 0.1 | Aq.  | 48     | 48, 72, 96, 168 | Finn Chambers (8 mm), applied on the upper back with Scanpor tape                                                            | 686    | 38  | 5.50 | [19] |
| 0.1 | Aq.  | 48     | 48, 72          | Finn Chambers applied on the upper back                                                                                      | 2295   | 126 | 5.49 | [20] |
| 0.1 | Aq.  | 48     | 72, 120         | Finn Chambers on Scanpor                                                                                                     | 34     | 2   | 5.88 | [21] |
| 0.1 | Aq.  | 48     | 48, 72, 96, 168 | Finn Chambers (8 mm), applied on the upper aspect of the back                                                                | 3838   | 318 | 8.30 | [21] |
| 0.1 | Aq.  | 48     | 48, 72, 96, 168 | Finn Chambers (8 mm), applied on the upper aspect of the back                                                                | 2979   | 262 | 8.80 | [21] |

|                     |     |      |    |                    |                                                                                  |      |    |       |      |
|---------------------|-----|------|----|--------------------|----------------------------------------------------------------------------------|------|----|-------|------|
|                     | 0.1 | Aq.  | 48 | 48, 72, 96,<br>168 | Finn Chambers (8 mm), applied on the upper aspect of the back                    | 928  | 99 | 10.70 | [4]  |
|                     | 0.1 | Pet. | 48 | 48, 96             | Finn Chambers (8 mm), applied on the upper back with Scanpor tape                | 584  | 71 | 12.16 | [22] |
| <b>Benzocaine</b>   | 5   | Pet. | 48 | 48, 96             | Finn Chambers on Scanpor tape applied on back                                    | 125  | 0  | 0     | [23] |
|                     | 5   | Pet. | 48 | 48, 72, 96,<br>168 | Finn Chambers (8 mm), applied on the upper aspect of the back                    | 3086 | 65 | 2.10  | [21] |
|                     | 5   | Pet. | 48 | 48, 72, 96,<br>168 | n/a                                                                              | 1526 | 3  | 0.20  | [24] |
|                     | 5   | Pet. | 48 | 48, 72, 96,<br>168 | n/a                                                                              | 692  | 2  | 0.30  | [25] |
|                     | 5   | Pet. | 48 | 48, 72, 96,<br>168 | n/a                                                                              | 772  | 2  | 0.30  | [25] |
|                     | 5   | Pet. | 48 | 48, 72             | Aluminium patch test chambers mounted on Micropore carried out on the upper back | 200  | 5  | 2.50  | [26] |
|                     | 5   | Pet. | 48 | 48, 72             | Finn Chambers on Scanpor tape applied to upper back                              | 2758 | 20 | 0.70  | [27] |
| <b>Benzoic acid</b> | 5   | Pet. | 48 | 72, 120            | Finn Chambers on Scanpor                                                         | 40   | 5  | 1.25  | [21] |

|                       |   |      |        |                    |                                                                                    |        |     |      |      |
|-----------------------|---|------|--------|--------------------|------------------------------------------------------------------------------------|--------|-----|------|------|
|                       | 5 | Pet. | 48     | 48, 72, 96,<br>168 | Finn Chambers (8 mm), applied on the upper back with Scanpor tape                  | 1963   | 96  | 4.90 | [19] |
|                       | 5 | Pet. | 48     | 48, 72, 96,<br>168 | Finn Chambers (8 mm), applied on the upper aspect of the back                      | 1963   | 96  | 4.90 | [21] |
|                       | 5 | Pet. | 48     | 48, 72, 96,<br>168 | Finn Chambers (8 mm), applied on the upper aspect of the back                      | 3077   | 175 | 5.70 | [21] |
|                       | 5 | Pet. | 48     | 48, 72, 96,<br>168 | Finn Chambers on Scanpor tape applied to a patient's upper back                    | 864    | 53  | 6.10 | [4]  |
| <b>Benzyl alcohol</b> | 1 | Pet. | 48     | 72, 96             | n/a                                                                                | 6993   | 22  | 0.30 | [10] |
|                       | 1 | Pet. | 24, 48 | 72                 | n/a                                                                                | 2166   | 7   | 0.30 | [11] |
|                       | 1 | Pet. | 48     | 48, 72, 96,<br>168 | Finn Chambers on Scanpor tape applied to a patient's upper back                    | 869    | 3   | 0.30 | [4]  |
|                       | 1 | Pet. | 48     | 72, 96             | n/a                                                                                | 79 770 | 258 | 0.32 | [28] |
|                       | 1 | Pet. | 48     | 48, 96             | Finn Chambers on Scanpor tape to the upper back                                    | 4552   | 18  | 0.40 | [29] |
|                       | 1 | Pet. | 24, 48 | 72                 | Finn Chambers (8 mm) on Scan-por (19 departments), Leukotest, Hal, Curatest, Haye, | 11 373 | 46  | 0.40 | [17] |

|                         |   |      |        |                    |                                                                              |      |   |      |      |
|-------------------------|---|------|--------|--------------------|------------------------------------------------------------------------------|------|---|------|------|
|                         |   |      |        |                    | Intradex Service BV,<br>Alphen aan den Rijn,                                 |      |   |      |      |
|                         | 5 | pet. | 48     | 48, 72, 120        | Finn Chambers<br>applied to the upper<br>back                                | 167  | 2 | 1.20 | [13] |
| <b>Benzyl benzoate</b>  | 1 | Pet. | 24, 48 | 72                 | n/a                                                                          | 2003 | 1 | 0.05 | [11] |
|                         | 1 | Pet. | 48     | 48, 96             | Finn Chambers<br>applied on the back                                         | 312  | 1 | 0.30 | [3]  |
|                         | 1 | Pet. | 48     | 48, 96             | Finn Chambers<br>applied on Scanpor<br>tape to the upper<br>back of patients | 308  | 2 | 0.60 | [6]  |
| <b>Benzyl cinnamate</b> | 5 | Pet. | 48     | 48, 72, 96,<br>168 | Finn Chambers (8<br>mm), applied on the<br>back with Scanpor<br>tape         | 1503 | 1 | 0.10 | [2]  |
|                         | 5 | Pet. | 48     | 72, 96             | n/a                                                                          | 2872 | 4 | 0.14 | [30] |
|                         | 5 | Pet. | 24, 48 | 72                 | n/a                                                                          | 2042 | 6 | 0.30 | [11] |
|                         | 5 | Pet. | 48     | 48, 96             | Finn Chambers<br>applied on the back                                         | 312  | 1 | 0.30 | [3]  |
|                         | 5 | Pet. | 48     | 48, 96             | Finn Chambers<br>applied on Scanpor<br>tape to the upper<br>back of patients | 308  | 2 | 0.60 | [6]  |
|                         | 5 | Pet. | 48     | 48,96              | Finn Chambers<br>applied on Scanpor<br>tape to the upper<br>back of patients | 308  | 2 | 0.60 | [6]  |
|                         | 5 | Pet. | 48     | 48, 120            | Finn Chambers (8<br>mm), applied on the                                      | 167  | 8 | 4.80 | [13] |
|                         |   |      |        |                    |                                                                              |      |   |      |      |

|                          |     |      |        |                    |                                                                             |      |    |      |      |
|--------------------------|-----|------|--------|--------------------|-----------------------------------------------------------------------------|------|----|------|------|
|                          |     |      |        |                    | upper back with<br>Scanpor tape                                             |      |    |      |      |
| <b>Benzyl salicylate</b> | 2   | Pet. | 48     | n/a                | n/a                                                                         | 59   | 4  | 6.80 | [9]  |
|                          | 1   | Pet. | 48     | 72, 96             | n/a                                                                         | 3775 | 2  | 0.05 | [30] |
|                          | 1   | Pet. | 24, 48 | 72                 | n/a                                                                         | 2041 | 2  | 0.10 | [11] |
|                          | 1   | Pet. | 48     | 48, 72, 96,<br>168 | Finn Chambers (8<br>mm), applied on the<br>back with Scanpor<br>tape        | 1503 | 3  | 0.20 | [2]  |
|                          | 2   | Pet. | 48     | 48, 96             | Finn Chambers<br>applied on the back                                        | 312  | 4  | 1.30 | [3]  |
|                          | 2   | Pet. | 48     | 48, 96, 168        | Finn Chambers fixed<br>with Scanpor                                         | 86   | 2  | 2.30 | [31] |
|                          | 2   | Pet. | 48     | 48, 120            | Finn Chambers (8<br>mm), applied on the<br>upper back with<br>Scanpor tape  | 167  | 5  | 3.00 | [13] |
| <b>Black rubber mix</b>  | 0.6 | Pet. | 48     | 72, 144, 168       | IQ Chambers from<br>Chemotechnique<br>Diagnostics AB<br>applied on the back | 3112 | 16 | 0.50 | [32] |
|                          | 0.6 | Pet. | 48     | 72, 144, 168       | IQ Chambers from<br>Chemotechnique<br>Diagnostics AB<br>applied on the back | 3825 | 23 | 0.60 | [32] |
|                          | 0.6 | Pet. | 48     | 48, 72, 96,<br>168 | Finn Chambers (8<br>mm), applied on the<br>upper aspect of the<br>back      | 3092 | 25 | 0.80 | [21] |
|                          | 0.6 | Pet. | 48     | 48, 72, 96,<br>168 | Finn Chambers (8<br>mm), applied on the                                     | 3840 | 35 | 0.90 | [19] |

|          |      |      |    |                    |                                                                        |        |    |      |      |
|----------|------|------|----|--------------------|------------------------------------------------------------------------|--------|----|------|------|
| Bronopol |      |      |    |                    | upper back with<br>Scanpor tape                                        |        |    |      |      |
|          | 0.6  | Pet. | 48 | 48, 72             | Finn Chambers on<br>Sanpor applied on<br>the upper back                | 373    | 5  | 1.30 | [33] |
|          | 0.6  | Pet. | 48 | 48, 96             | IQ Chambers                                                            | 327    | 7  | 2.10 | [34] |
|          | 0.25 | Pet. | 48 | 48, 96             | Finn Chambers fixed<br>with Scanpor tape                               | 1192   | 2  | 0.16 | [35] |
|          | 0.25 | Pet. | 48 | 48, 96             | Komory IQ<br>Chambers<br>Chemotechnique<br>Diagnostics                 | 405    | 1  | 0.20 | [14] |
|          | 0.5  | Pet. | 48 | 48, 72, 96,<br>168 | n/a                                                                    | 1389   | 4  | 0.30 | [35] |
|          | 0.5  | Pet. | 48 | 48, 72, 96,<br>168 | n/a                                                                    | 1394   | 6  | 0.40 | [35] |
|          | 0.5  | Pet. | 48 | 72, 96             | n/a                                                                    | 702    | 4  | 0.40 | [30] |
|          | 0.5  | Pet. | 48 | 48, 72, 96         | Finn Chambers (8<br>mm) on Scanpor tape                                | 8149   | 38 | 0.47 | [36] |
|          | 0.5  | Pet. | 48 | 72, 96             | n/a                                                                    | 2138   | 11 | 0.50 | [37] |
|          | 0.5  | Pet. | 48 | 48, 72, 96,<br>168 | n/a                                                                    | 1457   | 7  | 0.50 | [25] |
|          | 0.5  | Pet. | 48 | 48, 72, 96,<br>168 | Finn Chambers<br>(8mm) on Scanpor<br>tape                              | 11 272 | 67 | 0.60 | [37] |
|          | 0.25 | Pet. | 48 | 48, 72, 96,<br>168 | Finn Chambers (8<br>mm), applied on the<br>upper aspect of the<br>back | 944    | 7  | 0.70 | [21] |
|          | 0.5  | Pet. | 48 | 48, 96             | Finn Chambers<br>secured with Scanpor                                  | 3062   | 25 | 0.80 | [39] |

| tape and left on the back |      |        |        |                                                                                                                                                |        |     |      |      |  |
|---------------------------|------|--------|--------|------------------------------------------------------------------------------------------------------------------------------------------------|--------|-----|------|------|--|
| 1                         | Aq.  | 48     | 48, 96 | Finn Chambers<br>applied with Scanpor<br>tape to the upper<br>back                                                                             | 2298   | 20  | 0.80 | [40] |  |
| 0.5                       | Pet. | 48     | 72, 96 | n/a                                                                                                                                            | 1904   | 15  | 0.80 | [30] |  |
| 0.25                      | Pet. | 48     | 48, 96 | Finn Chambers on<br>Scanpor tape to the<br>upper back                                                                                          | 4756   | 43  | 0.90 | [29] |  |
| 0.25                      | Pet. | 48     | 48, 96 | IQ Chambers                                                                                                                                    | 327    | 3   | 0.90 | [34] |  |
| 0.5                       | Pet. | 48     | 72, 96 | n/a                                                                                                                                            | 14 728 | 147 | 1.00 | [10] |  |
| 0.5                       | Pet. | 48     | 48, 72 | Finn Chambers on<br>Scanpor tape applied<br>to upper back                                                                                      | 2758   | 27  | 1.00 | [27] |  |
| 0.5                       | Pet. | 48     | 72, 96 | n/a                                                                                                                                            | 10 124 | 120 | 1.20 | [10] |  |
| 0.5                       | Pet. | 48     | 48, 72 | Finn Chambers<br>applied on the upper<br>back                                                                                                  | 2295   | 28  | 1.20 | [20] |  |
| 0.5                       | Pet. | 24, 48 | 72     | Finn Chambers (8<br>mm) on Scan-por (19<br>departments),<br>Leukotest, Hal,<br>Curatest, Haye,<br>Intradex Service BV,<br>Alphen aan den Rijn, | 11 443 | 134 | 1.20 | [17] |  |
| 0.5                       | Pet. | 48     | 72, 96 | n/a                                                                                                                                            | 6792   | 91  | 1.30 | [10] |  |
| 0.25                      | Pet. | 48     | 48, 96 | Finn Chambers (8<br>mm) or IQ Chambers                                                                                                         | 9361   | 122 | 1.30 | [41] |  |
| 0.5                       | Pet. | 48     | 72, 96 | n/a                                                                                                                                            | 42 882 | 613 | 1.40 | [28] |  |
| 0.5                       | Pet. | 48     | 72, 96 | n/a                                                                                                                                            | 2248   | 39  | 1.70 | [37] |  |

|      |      |    |                    |                                                                            |      |     |      |      |
|------|------|----|--------------------|----------------------------------------------------------------------------|------|-----|------|------|
| 0.5  | Pet. | 48 | 48, 72, 96,<br>168 | n/a                                                                        | 1459 | 26  | 1.80 | [25] |
| 0.5  | Pet. | 48 | 72, 96             | n/a                                                                        | 1984 | 39  | 1.97 | [37] |
| 0.25 | Pet. | 48 | 48, 72, 96,<br>168 | Finn Chambers (8<br>mm), applied on the<br>upper back with<br>Scanpor tape | 991  | 20  | 2.00 | [19] |
| 0.25 | Pet. | 48 | 48, 72, 96,<br>168 | Finn Chambers (8<br>mm), applied on the<br>upper back with<br>Scanpor tape | 3841 | 81  | 2.10 | [19] |
| 0.5  | Pet. | 48 | 48, 72, 96,<br>168 | Finn Chambers (8<br>mm), applied on the<br>upper back with<br>Scanpor tape | 328  | 7   | 2.10 | [19] |
| 0.5  | Pet. | 48 | 72, 96             | Curatest<br>Lohman&Rauscher,<br>Rengsdorf Germany                          | 1927 | 48  | 2.50 | [15] |
| 0.5  | Pet. | 48 | 48, 72, 96,<br>168 | Finn Chambers (8<br>mm), applied on the<br>upper aspect of the<br>back     | 2142 | 54  | 2.50 | [21] |
| 0.5  | Pet. | 48 | 48, 72, 96,<br>168 | Finn Chambers (8<br>mm), applied on the<br>upper back with<br>Scanpor tape | 4897 | 162 | 3.30 | [19] |
| 0.25 | Pet. | 48 | 48, 96             | Finn Chambers (8<br>mm), applied on the<br>upper back with<br>Scanpor tape | 584  | 19  | 3.30 | [22] |
| 0.5  | Pet. | 48 | 48, 72, 96,<br>168 | Finn Chambers (8<br>mm), applied on the                                    | 4435 | 151 | 3.40 | [21] |

|                                    |     |      |        |                 |                                                                     |      |    |      |      |
|------------------------------------|-----|------|--------|-----------------|---------------------------------------------------------------------|------|----|------|------|
|                                    |     |      |        |                 | upper aspect of the back                                            |      |    |      |      |
|                                    | 0.5 | Pet. | 48     | 48, 96          | Finn Chambers on Scanpor tape applied to the areas of the back      | 342  | 16 | 5.00 | [42] |
| <b>Butylhydroxyanisole (BHA)</b>   | 2   | Pet. | 48     | 48, 72, 96, 168 | Finn Chambers (8 mm), applied on the upper aspect of the back       | 944  | 6  | 0.60 | [4]  |
|                                    | 2   | Pet. | 48     | 48, 96          | Finn Chambers on Scanpor applied to the upper back                  | 91   | 2  | 2.20 | [43] |
| <b>Butylphenyl Methylpropional</b> | 10  | Pet. | 48     | 48, 72, 96, 168 | Finn Chambers (8 mm), applied on the back with Scanpor tape         | 1503 | 4  | 0.30 | [2]  |
|                                    | 10  | Pet. | 24, 48 | 72              | n/a                                                                 | 2004 | 8  | 0.40 | [11] |
|                                    | 10  | Pet. | 48     | 48, 96          | Finn Chambers applied on Scanpor tape to the upper back of patients | 308  | 2  | 0.60 | [6]  |
|                                    | 10  | Pet. | 48     | 72, 96          | n/a                                                                 | 1003 | 6  | 0.60 | [12] |
|                                    | 10  | Pet. | 48     | 48, 96          | Finn Chambers applied on the back                                   | 312  | 3  | 1.00 | [3]  |
|                                    | 5   | Pet. | 48     | 48, 120         | Finn Chambers (8 mm), applied on the upper back with Scanpor tape   | 167  | 3  | 1.80 | [13] |
| <b>Caine Mix</b>                   | 7   | Pet. | 48     | 72, 144, 168    | IQ Chambers from Chemotechnique Diagnostics AB applied on the back  | 3112 | 22 | 0.70 | [32] |

|                  |   |      |    |                 |                                                                   |      |     |      |      |
|------------------|---|------|----|-----------------|-------------------------------------------------------------------|------|-----|------|------|
|                  | 7 | Pet. | 48 | 72              | Finn Chambers and TRUE Test applied on the back                   | 3662 | 40  | 1.10 | [32] |
|                  | 7 | Pet. | 48 | 48, 72          | Finn Chambers on Sanpor applied on the upper back                 | 373  | 5   | 1.30 | [33] |
|                  | 7 | Pet. | 48 | 48, 96          | n/a                                                               | 385  | 5   | 1.30 | [16] |
|                  | 7 | Pet. | 48 | 48, 72, 96, 168 | Finn Chambers (8 mm), applied on the upper back with Scanpor tape | 1669 | 75  | 4.50 | [19] |
| <b>Carba Mix</b> | 3 | Pet. | 48 | 48, 96          | Finn Chambers on Scanpor tape applied on back                     | 125  | 1   | 0.80 | [23] |
|                  | 3 | Pet. | 48 | 48, 72          | Finn Chambers on Sanpor applied on the upper back                 | 244  | 3   | 1.20 | [33] |
|                  | 3 | Pet. | 48 | 48, 72, 96, 168 | Finn Chambers (8 mm), applied on the upper back with Scanpor tape | 3841 | 177 | 4.60 | [19] |
|                  | 3 | Pet. | 48 | 48, 72, 96, 168 | Finn Chambers (8 mm), applied on the upper aspect of the back     | 3085 | 176 | 5.70 | [21] |
|                  | 3 | Pet. | 48 | 96              | Finn Chambers applied to the back of the patients                 | 618  | 45  | 7.30 | [44] |
| <b>Cinnamal</b>  | 1 | Pet. | 48 | 48, 72, 96, 168 | Finn Chambers (8 mm), applied on the back with Scanpor tape       | 1503 | 20  | 1.30 | [2]  |

|                  |   |          |        |                 |                                                                                                       |      |     |       |      |
|------------------|---|----------|--------|-----------------|-------------------------------------------------------------------------------------------------------|------|-----|-------|------|
| Cinnamic alcohol | 1 | Pet.     | 48     | 48              | Finn Chambers on Scanpor tape                                                                         | 422  | 7   | 1.70  | [1]  |
|                  | 1 | Pet.     | 48     | 48, 96          | Finn Chambers applied on the back                                                                     | 312  | 28  | 9.00  | [3]  |
|                  | 2 | Pet.     | 48     | n/a             | TRUE Test and Finn Chambers                                                                           | 3119 | 10  | 0.30  | [5]  |
|                  | 1 | Pet.     | 24, 48 | 72              | n/a                                                                                                   | 2063 | 13  | 0.60  | [11] |
|                  | 1 | Pet.     | 48     | 48, 72, 96, 168 | Finn Chambers (8 mm), applied on the back with Scanpor tape                                           | 1501 | 10  | 0.70  | [2]  |
|                  | 1 | Pet.     | 48     | 72, 96          | n/a                                                                                                   | 5650 | 46  | 0.80  | [12] |
|                  | 1 | Pet.     | 48     | 48              | Finn Chambers on Scanpor tape                                                                         | 422  | 13  | 3.10  | [1]  |
|                  | 5 | lanolina | 48     | 48, 120         | Finn Chambers (8 mm), applied on the upper back with Scanpor tape                                     | 167  | 11  | 6.60  | [13] |
|                  | 1 | Pet.     | 48     | 48, 96          | Finn Chambers on Scanpor applied to the upper back                                                    | 40   | 4   | 10.00 | [43] |
|                  | 1 | Pet.     | 48     | 72, 96          | n/a                                                                                                   | 405  | 45  | 11.10 | [10] |
|                  | 1 | Pet.     | 48     | 48, 96          | Finn Chambers applied on the back                                                                     | 312  | 35  | 11.20 | [3]  |
|                  | 2 | Pet.     | 48     | 48, 72, 96      | Van der Bend patch test chambers applied on the back with Micropore and fixed with Fixomull and Mefix | 940  | 129 | 13.70 | [8]  |
|                  | 2 | Pet.     | 48     | 48, 96, 168     | Finn Chambers fixed with Scanpor                                                                      | 86   | 12  | 13.90 | [31] |
|                  | 1 | Pet.     | 48     | n/a             | n/a                                                                                                   | 59   | 27  | 45.80 | [9]  |

|                   |   |      |        |                 |                                                                     |      |     |      |      |
|-------------------|---|------|--------|-----------------|---------------------------------------------------------------------|------|-----|------|------|
| Cinnamic aldehyde | 1 | Pet. | 48     | 48, 96          | Finn Chambers applied on Scanpor tape to the upper back of patients | 308  | 2   | 0.60 | [6]  |
|                   | 1 | Pet. | 24, 48 | 72              | n/a                                                                 | 2063 | 21  | 1.00 | [11] |
|                   | 1 | Pet. | 48     | 48, 72, 96, 168 | Finn Chambers (8 mm), applied on the upper back with Scanpor tape   | 1321 | 22  | 1.70 | [19] |
|                   | 1 | Pet. | 48     | 48, 72, 96, 168 | Finn Chambers (8 mm), applied on the upper aspect of the back       | 3085 | 56  | 1.80 | [21] |
|                   | 1 | Pet. | 48     | 48, 72, 96, 168 | Finn Chambers (8 mm), applied on the upper aspect of the back       | 943  | 17  | 1.80 | [4]  |
|                   | 1 | Pet. | 48     | 48, 72, 96, 168 | Finn Chambers (8 mm), applied on the upper back with Scanpor tape   | 3114 | 62  | 2.00 | [19] |
|                   | 1 | Pet. | 48     | 48, 72, 96, 168 | Finn Chambers (8 mm), applied on the upper aspect of the back       | 3114 | 62  | 2.00 | [21] |
|                   | 1 | Pet. | 48     | 48, 72, 96, 168 | Finn Chambers (8 mm), applied on the upper aspect of the back       | 4435 | 137 | 3.10 | [21] |
|                   | 1 | Pet. | 48     | 72, 120         | Finn Chambers on Scanpor                                            | 34   | 2   | 6.00 | [21] |

|       |   |      |    |                 |                                                                                                       |      |    |       |      |
|-------|---|------|----|-----------------|-------------------------------------------------------------------------------------------------------|------|----|-------|------|
| Cital | 1 | Pet. | 48 | 48, 96          | Finn Chambers on Scanpor applied to the upper back                                                    | 40   | 5  | 12.50 | [43] |
|       | 1 | Pet. | 48 | 48, 120         | Finn Chambers (8 mm), applied on the upper back with Scanpor tape                                     | 167  | 24 | 14.40 | [13] |
|       | 1 | Pet. | 48 | n/a             | n/a                                                                                                   | 59   | 21 | 35.60 | [9]  |
|       | 2 | Pet. | 48 | n/a             | TRUE Test and Finn Chambers                                                                           | 3119 | 6  | 0.20  | [5]  |
|       | 2 | Pet. | 48 | 48, 72, 96, 168 | Finn Chambers (8 mm), applied on the back with Scanpor tape                                           | 1502 | 4  | 0.30  | [2]  |
|       | 2 | Pet. | 48 | 48, 96          | Finn Chambers applied on Scanpor tape to the upper back of patients                                   | 308  | 2  | 0.60  | [6]  |
|       | 2 | Pet. | 48 | 48              | Finn Chambers on Scanpor tape                                                                         | 422  | 5  | 1.20  | [1]  |
|       | 2 | Pet. | 48 | 48, 96, 168     | Finn Chambers fixed with Scanpor                                                                      | 86   | 2  | 2.30  | [31] |
|       | 2 | Pet. | 48 | 48, 72, 96      | Van der Bend patch test chambers applied on the back with Micropore and fixed with Fixomull and Mefix | 205  | 27 | 13.20 | [8]  |
|       | 2 | Pet. | 48 | 72, 96          | n/a                                                                                                   | 137  | 26 | 19.00 | [10] |
|       | 2 | Pet. | 48 | 72              | n/a                                                                                                   | 2021 | 13 | 0.60  | [11] |
|       | 2 | Pet. | 48 | 48, 96          | Finn Chambers applied on the back                                                                     | 312  | 10 | 3.20  | [3]  |

|                            |   |      |        |                 |                                                                                                       |      |    |      |      |
|----------------------------|---|------|--------|-----------------|-------------------------------------------------------------------------------------------------------|------|----|------|------|
| <b>Citronellol</b>         | 1 | Pet. | 48     | n/a             | TRUE Test and Finn Chambers                                                                           | 3119 | 3  | 0.10 | [5]  |
|                            | 1 | Pet. | 48     | 48, 72, 96, 168 | Finn Chambers (8 mm), applied on the back with Scanpor tape                                           | 1503 | 1  | 0.10 | [2]  |
|                            | 1 | Pet. | 24, 48 | 72              | n/a                                                                                                   | 2003 | 9  | 0.40 | [11] |
|                            | 1 | Pet. | 48     | 48, 96          | Finn Chambers applied on Scanpor tape to the upper back of patients                                   | 308  | 2  | 0.60 | [6]  |
|                            | 1 | Pet. | 48     | 48, 96          | Finn Chambers applied on the back                                                                     | 312  | 3  | 1.00 | [3]  |
|                            | 1 | Pet. | 48     | 48, 72, 96      | Van der Bend patch test chambers applied on the back with Micropore and fixed with Fixomull and Mefix | 205  | 11 | 5.40 | [8]  |
|                            | 5 | Pet. | 48     | 48, 120         | Finn Chambers secured to the skin with Scanpor tape applied to the upper back                         | 178  | 10 | 5.60 | [7]  |
|                            | 1 | Pet. | 48     | 72, 96          | n/a                                                                                                   | 137  | 8  | 5.80 | [10] |
|                            | 5 | Pet. | 48     | 48, 120         | n/a                                                                                                   | 218  | 19 | 8.70 | [44] |
| <b>Cobalt (di)chloride</b> | 1 | Pet. | 48     | 48, 96          | n/a                                                                                                   | 50   | 2  | 4.00 | [16] |
|                            | 1 | Pet. | 48     | 48, 96          | IQ Chambers                                                                                           | 327  | 23 | 7.00 | [34] |
|                            | 1 | Pet. | 48     | 48, 72          | Aluminium patch test chambers mounted on Micropore carried                                            | 200  | 16 | 8.00 | [26] |

|   |      |    |                    |                                                                             |                          |     |       |      |  |
|---|------|----|--------------------|-----------------------------------------------------------------------------|--------------------------|-----|-------|------|--|
|   |      |    |                    |                                                                             | out on the upper<br>back |     |       |      |  |
| 1 | Pet. | 48 | 48, 96             | n/a                                                                         | 385                      | 35  | 9.00  | [16] |  |
| 1 | Pet. | 48 | 48, 72, 96,<br>168 | Finn Chambers (8<br>mm), applied on the<br>upper back with<br>Scanpor tape  | 3818                     | 393 | 10.30 | [19] |  |
| 1 | Pet. | 48 | 48, 72, 96,<br>168 | n/a                                                                         | 1471                     | 50  | 3.40  | [25] |  |
| 1 | Pet. | 48 | 72, 144, 168       | IQ Chambers from<br>Chemotechnique<br>Diagnostics AB<br>applied on the back | 3825                     | 245 | 6.40  | [32] |  |
| 1 | Pet. | 48 | 72, 144, 168       | IQ Chambers from<br>Chemotechnique<br>Diagnostics AB<br>applied on the back | 3112                     | 140 | 4.50  | [32] |  |
| 1 | Pet. | 48 | 96                 | Finn Chambers<br>applied to the back of<br>the patients                     | 618                      | 65  | 10.50 | [44] |  |
| 1 | Pet. | 48 | 72                 | Finn Chambers and<br>TRUE Test applied<br>on the back                       | 3662                     | 42  | 6.60  | [32] |  |
| 1 | Pet. | 48 | 48, 72, 96,<br>168 | Finn Chambers (8<br>mm), applied on the<br>upper aspect of the<br>back      | 3092                     | 359 | 11.60 | [21] |  |
| 1 | Pet. | 48 | 48, 72, 96,<br>168 | n/a                                                                         | 1399                     | 82  | 5.90  | [35] |  |
| 1 | Pet. | 48 | 48, 96             | Finn Chambers on<br>Scanpor tape applied<br>on back                         | 125                      | 5   | 4.00  | [23] |  |

|                               |    |      |    |                 |                                                                     |        |      |       |      |
|-------------------------------|----|------|----|-----------------|---------------------------------------------------------------------|--------|------|-------|------|
|                               | 1  | Pet. | 48 | 72, 120         | Finn Chambers on Scanpor                                            | 40     | 4    | 10.00 | [21] |
|                               | 1  | Pet. | 48 | 48, 72          | Finn Chambers on Sanpor applied on the upper back                   | 373    | 24   | 6.40  | [33] |
|                               | 1  | Pet. | 48 | 72, 96          | n/a                                                                 | 10 124 | 494  | 4.90  | [10] |
|                               | 1  | Pet. | 48 | 72, 96          | n/a                                                                 | 14 728 | 1016 | 6.90  | [10] |
| <b>Cocamidopropyl betaine</b> | 1  | Aq.  | 48 | 48, 96          | Finn Chambers applied on Scanpor tape to the upper back of patients | 308    | 2    | 0.60  | [6]  |
|                               | 1  | Aq.  | 48 | 72, 96          | n/a                                                                 | 1903   | 37   | 1.90  | [30] |
|                               | 1  | Aq.  | 48 | 72, 96          | n/a                                                                 | 1723   | 41   | 2.40  | [37] |
|                               | 1  | Aq.  | 48 | 72, 96          | n/a                                                                 | 744    | 22   | 3.00  | [30] |
|                               | 1  | Aq.  | 48 | 48, 72, 96, 168 | Finn Chambers (8 mm), applied on the upper aspect of the back       | 935    | 32   | 3.40  | [4]  |
|                               | 1  | Aq.  | 48 | 48, 72, 96, 168 | Finn Chambers (8 mm), applied on the upper aspect of the back       | 3003   | 120  | 4.00  | [21] |
|                               | 1  | Aq.  | 48 | 48, 96          | Aluminium chambers carried out on the upper back                    | 33     | 2    | 6.00  | [45] |
| <b>Colophonium</b>            | 20 | Pet. | 48 | 48, 96          | Finn Chambers on Scanpor tape applied on back                       | 125    | 1    | 0.80  | [23] |
|                               | 20 | Pet. | 48 | 48, 72, 96, 168 | Finn Chambers (8 mm), applied on the                                | 4447   | 98   | 2.20  | [21] |

|    |      |    |                 |                                                                    |                          |     |      |      |  |
|----|------|----|-----------------|--------------------------------------------------------------------|--------------------------|-----|------|------|--|
|    |      |    |                 |                                                                    | upper aspect of the back |     |      |      |  |
| 20 | Pet. | 48 | 120, 168        | IQ Ultra Chambers applied on the patient's back                    | 1608                     | 38  | 2.40 | [46] |  |
| 20 | Pet. | 48 | 72, 144, 168    | IQ Chambers from Chemotechnique Diagnostics AB applied on the back | 3112                     | 75  | 2.40 | [32] |  |
| 20 | Pet. | 48 | 72, 120         | Finn Chambers on Scanpor                                           | 40                       | 1   | 2.50 | [21] |  |
| 20 | Pet. | 48 | 48, 72, 96, 168 | Finn Chambers (8 mm), applied on the upper aspect of the back      | 942                      | 24  | 2.50 | [4]  |  |
| 20 | Pet. | 48 | 48, 72, 96, 168 | Finn Chambers (8 mm), applied on the upper back with Scanpor tape  | 1322                     | 33  | 2.50 | [19] |  |
| 20 | Pet. | 48 | 48, 72, 96, 168 | Finn Chambers (8 mm), applied on the upper aspect of the back      | 3076                     | 80  | 2.60 | [21] |  |
| 20 | Pet. | 48 | 48, 72, 96, 168 | Finn Chambers (8 mm), applied on the upper back with Scanpor tape  | 3842                     | 100 | 2.60 | [19] |  |
| 20 | Pet. | 48 | 48, 72, 96, 168 | Finn Chambers (8 mm), applied on the upper back with Scanpor tape  | 4908                     | 128 | 2.60 | [19] |  |

|    |      |    |                    |                                                                             |        |      |      |      |
|----|------|----|--------------------|-----------------------------------------------------------------------------|--------|------|------|------|
| 20 | Pet. | 48 | 96                 | Finn Chambers<br>applied to the back of<br>the patients                     | 618    | 17   | 2.80 | [44] |
| 20 | Pet. | 48 | 48, 96             | n/a                                                                         | 385    | 11   | 2.90 | [16] |
| 20 | Pet. | 48 | 48, 72, 96,<br>168 | n/a                                                                         | 1992   | 62   | 3.10 | [24] |
| 20 | Pet. | 48 | 72, 96             | n/a                                                                         | 967    | 32   | 3.30 | [18] |
| 20 | Pet. | 48 | 72, 96             | n/a                                                                         | 2248   | 76   | 3.40 | [37] |
| 20 | Pet. | 48 | 72, 144, 168       | IQ Chambers from<br>Chemotechnique<br>Diagnostics AB<br>applied on the back | 3825   | 130  | 3.40 | [32] |
| 20 | Pet. | 48 | 48, 72             | Finn Chambers on<br>Scanpor tape applied<br>to upper back                   | 2758   | 99   | 3.60 | [27] |
| 20 | Pet. | 48 | 72, 96             | n/a                                                                         | 10 124 | 389  | 3.80 | [10] |
| 20 | Pet. | 48 | 72, 96             | n/a                                                                         | 14 728 | 574  | 3.90 | [10] |
| 20 | Pet. | 48 | 72, 96             | n/a                                                                         | 2046   | 80   | 3.90 | [37] |
| 20 | Pet. | 48 | 72, 96             | n/a                                                                         | 37 011 | 1603 | 4.33 | [12] |
| 20 | Pet. | 48 | 48, 72, 96,<br>168 | n/a                                                                         | 1468   | 64   | 4.40 | [25] |
| 20 | Pet. | 48 | 48, 96             | IQ Chambers                                                                 | 327    | 15   | 4.60 | [34] |
| 20 | Pet. | 48 | 72, 168            | Finn Chambers on<br>Scanpor tape                                            | 2598   | 119  | 4.60 | [47] |
| 20 | Pet. | 48 | 48, 72 96,<br>168  | n/a                                                                         | 1399   | 64   | 4.60 | [35] |
| 20 | Pet. | 48 | 48, 72             | Finn Chambers on<br>Sanpor applied on<br>the upper back                     | 373    | 18   | 4.80 | [33] |
| 20 | Pet. | 48 | 48, 96             | Finn Chambers<br>secured with Scanpor                                       | 3062   | 159  | 5.20 | [38] |

|          |    |      |        |                 |                                                                                  |      |     |       |      |
|----------|----|------|--------|-----------------|----------------------------------------------------------------------------------|------|-----|-------|------|
| Coumarin |    |      |        |                 | tape and left on the back                                                        |      |     |       |      |
|          | 20 | Pet. | 48     | 72              | Finn Chambers and TRUE Test applied on the back                                  | 3662 | 198 | 5.40  | [32] |
|          | 20 | Pet. | 48     | 48, 72          | Aluminium patch test chambers mounted on Micropore carried out on the upper back | 200  | 11  | 5.50  | [26] |
|          | 20 | Pet. | 48     | 48, 96          | Finn Chambers on Scanpor applied to the upper back                               | 91   | 15  | 16.50 | [43] |
|          | 5  | Pet. | 48     | n/a             | TRUE Test and Finn Chambers                                                      | 3119 | 3   | 0.10  | [5]  |
|          | 5  | Pet. | 48     | 48, 72, 96, 168 | Finn Chambers (8 mm), applied on the back with Scanpor tape                      | 1503 | 3   | 0.20  | [2]  |
|          | 5  | Pet. | 48     | 48, 96          | Finn Chambers applied on the back                                                | 312  | 1   | 0.30  | [3]  |
|          | 5  | Pet. | 24, 48 | 72              | n/a                                                                              | 2020 | 8   | 0.40  | [11] |
|          | 5  | Pet. | 48     | 48, 96          | Finn Chambers applied on Scanpor tape to the upper back of patients              | 308  | 2   | 0.60  | [6]  |
|          | 5  | Pet. | 48     | 48, 96, 168     | Finn Chambers fixed with Scanpor                                                 | 86   | 1   | 1.20  | [31] |
|          | 5  | Pet. | 48     | 48, 120         | Finn Chambers (8 mm), applied on the upper back with Scanpor tape                | 167  | 2   | 1.20  | [13] |

|                          |   |      |    |                 |                                                                                                       |        |     |      |      |
|--------------------------|---|------|----|-----------------|-------------------------------------------------------------------------------------------------------|--------|-----|------|------|
|                          | 5 | Pet. | 48 | 48, 72, 96      | Van der Bend patch test chambers applied on the back with Micropore and fixed with Fixomull and Mefix | 205    | 9   | 4.40 | [8]  |
|                          | 5 | Pet. | 48 | 72, 96          | n/a                                                                                                   | 137    | 6   | 5.80 | [10] |
| <b>Diazolidynyl urea</b> | 2 | Pet. | 48 | 48, 96          | Finn Chambers applied on Scanpor tape to the upper back of patients                                   | 308    | 1   | 0.30 | [6]  |
|                          | 2 | Pet. | 48 | 72, 144, 168    | IQ Chambers from Chemotechnique Diagnostics AB applied on the back                                    | 3112   | 16  | 0.50 | [32] |
|                          | 2 | Pet. | 48 | 48, 96          | Komory IQ Chambers Chemotechnique Diagnostics                                                         | 405    | 2   | 0.50 | [14] |
|                          | 2 | Pet. | 48 | 48, 96          | Finn Chambers secured with Scanpor tape and left on the back                                          | 3062   | 21  | 0.70 | [38] |
|                          | 2 | Pet. | 48 | 72, 96          | Curatest Lohman&Rauscher, Rengsdorf Germany                                                           | 1927   | 13  | 0.70 | [15] |
|                          | 2 | Pet. | 48 | 72, 96          | n/a                                                                                                   | 6979   | 48  | 0.70 | [10] |
|                          | 2 | Pet. | 48 | 72, 96          | n/a                                                                                                   | 78 711 | 587 | 0.75 | [28] |
|                          | 2 | Aq.  | 48 | 48, 96          | Finn Chambers fixed with Scanpor tape                                                                 | 3900   | 31  | 0.79 | [35] |
|                          | 2 | Pet. | 48 | 48, 72, 96, 168 | n/a                                                                                                   | 1398   | 15  | 1.10 | [35] |

|   |      |        |                 |                                                                                                                              |        |     |      |      |
|---|------|--------|-----------------|------------------------------------------------------------------------------------------------------------------------------|--------|-----|------|------|
| 2 | Pet. | 48     | 48, 96          | Finn Chambers (8 mm) or IQ Chambers                                                                                          | 9362   | 103 | 1.10 | [41] |
| 2 | Pet. | 24, 48 | 72              | Finn Chambers (8 mm) on Scan-por (19 departments), Leukotest, Hal, Curatest, Haye, Intradex Service BV, Alphen aan den Rijn, | 7812   | 98  | 1.25 | [17] |
| 1 | Aq.  | 48     | 48, 72, 96, 168 | Finn Chambers (8 mm), applied on the upper aspect of the back                                                                | 3086   | 40  | 1.30 | [21] |
| 2 | Pet. | 48     | 72, 144, 168    | IQ Chambers from Chemotecnique Diagnostics AB applied on the back                                                            | 3825   | 54  | 1.40 | [32] |
| 2 | Pet. | 48     | 48, 96          | Finn Chambers (8 mm), applied on the upper back with Scanpor tape                                                            | 584    | 8   | 1.40 | [22] |
| 2 | Pet. | 48     | 48, 72, 96, 168 | Finn Chambers (8mm) on Scanpor tape                                                                                          | 11 270 | 178 | 1.60 | [38] |
| 2 | Pet. | 48     | 72              | Finn Chambers and TRUE Test applied on the back                                                                              | 3662   | 66  | 1.90 | [32] |
| 1 | Aq.  | 48     | 48, 72, 96, 168 | Finn Chambers on Scanpor tape applied to a patient's upper back                                                              | 940    | 19  | 2.00 | [4]  |
| 1 | Aq.  | 48     | 48, 72, 96, 168 | Finn Chambers (8 mm), applied on the                                                                                         | 4433   | 98  | 2.20 | [21] |

|   |      |    |                 |                                                                   |                          |     |      |      |  |
|---|------|----|-----------------|-------------------------------------------------------------------|--------------------------|-----|------|------|--|
|   |      |    |                 |                                                                   | upper aspect of the back |     |      |      |  |
| 1 | Aq.  | 48 | 48, 72, 96, 168 | Finn Chambers (8 mm), applied on the upper aspect of the back     | 3840                     | 92  | 2.40 | [21] |  |
| 1 | Aq.  | 48 | 48, 72, 96, 168 | Finn Chambers (8 mm), applied on the upper back with Scanpor tape | 1319                     | 33  | 2.50 | [19] |  |
| 1 | Pet. | 48 | 48, 72, 96, 168 | Finn Chambers (8 mm), applied on the upper aspect of the back     | 3091                     | 77  | 2.50 | [21] |  |
| 1 | Pet. | 48 | 48, 72, 96, 168 | Finn Chambers (8 mm), applied on the upper back with Scanpor tape | 1033                     | 30  | 2.90 | [19] |  |
| 1 | Pet. | 48 | 48, 72, 96, 168 | Finn Chambers (8 mm), applied on the upper back with Scanpor tape | 4897                     | 152 | 3.10 | [19] |  |
| 1 | Pet. | 48 | 48, 72, 96, 168 | Finn Chambers on Scanpor tape applied to a patient's upper back   | 942                      | 29  | 3.10 | [4]  |  |
| 1 | Pet. | 48 | 48, 72, 96, 168 | Finn Chambers (8 mm), applied on the upper aspect of the back     | 3842                     | 134 | 3.50 | [21] |  |
| 1 | Pet. | 48 | 48, 72, 96, 168 | Finn Chambers (8 mm), applied on the                              | 4439                     | 164 | 3.70 | [21] |  |

|                       |   |      |        |                 |                                                                                                                              |        |     |      |      |
|-----------------------|---|------|--------|-----------------|------------------------------------------------------------------------------------------------------------------------------|--------|-----|------|------|
|                       |   |      |        |                 | upper aspect of the back                                                                                                     |        |     |      |      |
|                       | 2 | Pet. | 48     | 48, 96          | Finn Chambers on Scanpor tape applied to the areas of the back                                                               | 342    | 13  | 3.80 | [42] |
| <b>DMDM Hydantoin</b> | 2 | Pet. | 24, 48 | 72              | Finn Chambers (8 mm) on Scan-por (19 departments), Leukotest, Hal, Curatest, Haye, Intradex Service BV, Alphen aan den Rijn, | 1374   | 4   | 0.30 | [17] |
|                       | 1 | Aq.  | 48     | 48, 72, 96, 168 | Finn Chambers (8 mm), applied on the upper back with Scanpor tape                                                            | 1042   | 5   | 0.50 | [19] |
|                       | 2 | Pet. | 48     | 72, 96          | n/a                                                                                                                          | 78 266 | 388 | 0.50 | [28] |
|                       | 2 | Aq.  | 48     | 48, 96          | Finn Chambers applied on Scanpor tape to the upper back of patients                                                          | 308    | 2   | 0.60 | [6]  |
|                       | 2 | Aq.  | 48     | 48, 96          | Komory IQ Chambers Chemotechnique Diagnostics                                                                                | 405    | 3   | 0.70 | [14] |
|                       | 2 | Aq.  | 48     | 48, 72, 96, 168 | Finn Chambers (8mm) on Scanpor tape                                                                                          | 1946   | 14  | 0.70 | [38] |
|                       | 1 | Pet. | 48     | 48, 72, 96, 168 | Finn Chambers (8 mm), applied on the                                                                                         | 1321   | 11  | 0.80 | [19] |

|   |      |    |                    |                                                                            |                                 |    |      |      |  |
|---|------|----|--------------------|----------------------------------------------------------------------------|---------------------------------|----|------|------|--|
|   |      |    |                    |                                                                            | upper back with<br>Scanpor tape |    |      |      |  |
| 2 | Aq.  | 48 | 48, 96             | Finn Chambers fixed<br>with Scanpor tape                                   | 1163                            | 10 | 0.85 | [35] |  |
| 2 | Aq.  | 48 | 72, 96             | Curatest<br>Lohman&Rauscher,<br>Rengsdorf Germany                          | 1927                            | 17 | 0.90 | [15] |  |
| 2 | Aq.  | 48 | 48, 72, 96,<br>168 | Finn Chambers (8<br>mm), applied on the<br>upper back with<br>Scanpor tape | 411                             | 5  | 1.20 | [19] |  |
| 2 | Aq.  | 48 | 48, 72, 96,<br>168 | Finn Chambers (8<br>mm), applied on the<br>upper aspect of the<br>back     | 411                             | 5  | 1.20 | [21] |  |
| 1 | Aq.  | 48 | 48, 72, 96,<br>168 | Finn Chambers (8<br>mm), applied on the<br>upper back with<br>Scanpor tape | 3428                            | 44 | 1.30 | [19] |  |
| 1 | Aq.  | 48 | 48, 72, 96,<br>168 | Finn Chambers (8<br>mm), applied on the<br>upper aspect of the<br>back     | 3428                            | 45 | 1.30 | [21] |  |
| 1 | Aq.  | 48 | 48, 72, 96,<br>168 | Finn Chambers (8<br>mm), applied on the<br>upper aspect of the<br>back     | 4433                            | 62 | 1.40 | [21] |  |
| 2 | Aq.  | 48 | 48, 72, 96,<br>168 | Finn Chambers (8<br>mm), applied on the<br>upper aspect of the<br>back     | 3085                            | 43 | 1.40 | [21] |  |
| 1 | Pet. | 48 | 48, 72, 96,<br>168 | Finn Chambers on<br>Scanpor tape applied                                   | 937                             | 14 | 1.50 | [4]  |  |

|   |      |    |                 |                                                                   |                           |     |      |      |  |
|---|------|----|-----------------|-------------------------------------------------------------------|---------------------------|-----|------|------|--|
|   |      |    |                 |                                                                   | to a patient's upper back |     |      |      |  |
| 1 | Aq.  | 48 | 48, 96          | Finn Chambers (8 mm), applied on the upper back with Scanpor tape | 584                       | 10  | 1.70 | [22] |  |
| 3 | Aq.  | 48 | 48, 72          | Finn Chambers applied on the upper back                           | 2295                      | 39  | 1.70 | [20] |  |
| 2 | Aq.  | 48 | 48, 72, 96, 168 | Finn Chambers on Scanpor tape applied to a patient's upper back   | 327                       | 6   | 1.80 | [4]  |  |
| 1 | Pet. | 48 | 48, 72, 96, 168 | Finn Chambers (8 mm), applied on the upper aspect of the back     | 3087                      | 62  | 2.00 | [21] |  |
| 2 | Aq.  | 48 | 48, 96          | Finn Chambers on Scanpor tape to the upper back                   | 3709                      | 78  | 2.10 | [29] |  |
| 1 | Aq.  | 48 | 48, 72, 96, 168 | Finn Chambers (8 mm), applied on the upper back with Scanpor tape | 4897                      | 108 | 2.20 | [19] |  |
| 1 | Pet. | 48 | 48, 72, 96, 168 | Finn Chambers (8 mm), applied on the upper aspect of the back     | 3757                      | 83  | 2.20 | [21] |  |
| 1 | Pet. | 48 | 48, 72, 96, 168 | Finn Chambers (8 mm), applied on the                              | 4439                      | 115 | 2.60 | [21] |  |

|             |   |      |    |                 |                                                                    |        |     |      |      |
|-------------|---|------|----|-----------------|--------------------------------------------------------------------|--------|-----|------|------|
| Epoxy resin |   |      |    |                 | upper aspect of the back                                           |        |     |      |      |
|             | 1 | Pet. | 48 | 48, 72, 96, 168 | Finn Chambers (8 mm), applied on the upper back with Scanpor tape  | 4897   | 137 | 2.80 | [19] |
|             | 2 | Aq.  | 48 | 48, 96          | Finn Chambers on Scanpor tape applied to the areas of the back     | 342    | 14  | 4.00 | [42] |
|             | 1 | Pet. | 48 | 48, 96          | Finn Chambers on Scanpor tape applied on back                      | 125    | 0   | 0.00 | [23] |
|             | 1 | Pet. | 48 | 72, 96          | n/a                                                                | 10 124 | 97  | 1.00 | [10] |
|             | 1 | Pet. | 48 | 72, 168         | Finn Chambers on Scanpor tape                                      | 2598   | 26  | 1.00 | [47] |
|             | 1 | Pet. | 48 | 48, 72          | Finn Chambers on Scanpor tape applied to upper back                | 2758   | 3   | 0.10 | [27] |
|             | 1 | Pet. | 48 | 48, 72, 96, 168 | n/a                                                                | 1471   | 16  | 1.10 | [25] |
|             | 1 | Pet. | 48 | 48, 72, 96, 168 | n/a                                                                | 1469   | 60  | 4.10 | [25] |
|             | 1 | Pet. | 48 | 72, 144, 168    | IQ Chambers from Chemotechnique Diagnostics AB applied on the back | 3112   | 37  | 1.20 | [32] |
|             | 1 | Pet. | 48 | 72, 144, 168    | IQ Chambers from Chemotechnique Diagnostics AB applied on the back | 3825   | 46  | 1.20 | [32] |

|                              |   |      |    |                 |                                                                                  |      |    |      |      |
|------------------------------|---|------|----|-----------------|----------------------------------------------------------------------------------|------|----|------|------|
|                              | 1 | Pet. | 48 | 72              | Finn Chambers and TRUE Test applied on the back                                  | 3662 | 48 | 1.30 | [32] |
|                              | 1 | Pet. | 48 | 48, 72, 96, 168 | Finn Chambers (8 mm), applied on the upper aspect of the back                    | 3089 | 43 | 1.40 | [21] |
|                              | 1 | Pet. | 48 | 96              | Finn Chambers applied to the back of the patients                                | 618  | 9  | 1.50 | [44] |
|                              | 1 | Pet. | 48 | 48, 72          | Aluminium patch test chambers mounted on Micropore carried out on the upper back | 200  | 3  | 1.50 | [26] |
|                              | 1 | Pet. | 48 | 48, 72, 96, 168 | Finn Chambers (8 mm), applied on the upper back with Scanpor tape                | 3846 | 54 | 1.60 | [19] |
|                              | 1 | Pet. | 48 | 48, 72, 96, 168 | n/a                                                                              | 1399 | 23 | 1.60 | [35] |
|                              | 1 | Pet. | 48 | 48, 96          | n/a                                                                              | 385  | 6  | 1.60 | [16] |
|                              | 1 | Pet. | 48 | 48, 72          | Finn Chambers on Sanpor applied on the upper back                                | 373  | 3  | 0.80 | [33] |
| Ethylenediamine (dichloride) | 1 | Pet. | 48 | 48, 96          | n/a                                                                              | 385  | 5  | 1.30 | [16] |
|                              | 1 | Pet. | 48 | 48, 96          | Finn Chambers on Scanpor tape applied on back                                    | 125  | 3  | 2.40 | [23] |

|                |   |      |    |                 |                                                                    |      |    |      |      |
|----------------|---|------|----|-----------------|--------------------------------------------------------------------|------|----|------|------|
|                | 1 | Pet. | 48 | 48, 72          | Finn Chambers on Sanpor applied on the upper back                  | 373  | 24 | 6.40 | [33] |
|                | 1 | Pet. | 48 | 48, 72, 96, 168 | Finn Chambers (8 mm), applied on the upper aspect of the back      | 944  | 35 | 3.70 | [4]  |
|                | 1 | Pet. | 48 | 72, 144, 168    | IQ Chambers from Chemotechnique Diagnostics AB applied on the back | 3112 | 6  | 0.20 | [32] |
|                | 1 | Pet. | 48 | 72, 144, 168    | IQ Chambers from Chemotechnique Diagnostics AB applied on the back | 3825 | 54 | 1.40 | [32] |
|                | 1 | Pet. | 48 | 48, 96          | Finn Chambers (8 mm), applied on the upper back with Scanpor tape  | 584  | 12 | 2.10 | [22] |
|                | 1 | Pet. | 48 | 48, 72, 96, 168 | Finn Chambers (8 mm), applied on the upper back with Scanpor tape  | 3843 | 92 | 2.40 | [19] |
|                | 1 | Pet. | 48 | 48, 72, 96, 168 | Finn Chambers (8 mm), applied on the upper aspect of the back      | 3090 | 77 | 2.50 | [21] |
|                | 1 | Pet. | 48 | 48, 96          | IQ Chambers                                                        | 327  | 11 | 3.40 | [34] |
| <b>Eugenol</b> | 2 | Pet. | 48 | n/a             | TRUE Test and Finn Chambers                                        | 3119 | 6  | 0.20 | [5]  |

|                            |   |      |        |                    |                                                                                                                      |      |     |       |      |
|----------------------------|---|------|--------|--------------------|----------------------------------------------------------------------------------------------------------------------|------|-----|-------|------|
|                            | 1 | Pet. | 48     | 48, 72, 96,<br>168 | Finn Chambers (8<br>mm),<br>applied on the back<br>with Scanpor tape                                                 | 1502 | 4   | 0.30  | [2]  |
|                            | 1 | Pet. | 24, 48 | 72                 | n/a                                                                                                                  | 2065 | 11  | 0.50  | [11] |
|                            | 1 | Pet. | 48     | 48, 96             | Finn Chambers<br>applied on the back                                                                                 | 312  | 3   | 1.00  | [3]  |
|                            | 2 | Pet. | 48     | 48                 | Finn Chambers on<br>Scanpor tape                                                                                     | 422  | 8   | 1.90  | [1]  |
|                            | 2 | Pet. | 48     | 72, 120            | Finn Chambers on<br>Scanpor                                                                                          | 32   | 1   | 3.10  | [21] |
|                            | 1 | Pet. | 48     | 48, 96             | Finn Chambers on<br>Scanpor applied to<br>the upper back                                                             | 40   | 2   | 5.00  | [43] |
|                            | 5 | Pet. | 48     | 48, 120            | Finn Chambers (8<br>mm), applied on the<br>upper back with<br>Scanpor tape                                           | 167  | 13  | 7.80  | [13] |
|                            | 1 | Pet. | 48     | 72, 96             | n/a                                                                                                                  | 405  | 39  | 9.60  | [10] |
|                            | 2 | Pet. | 48     | 48, 72, 96         | Van der Bend patch<br>test chambers<br>applied on the back<br>with Micropore and<br>fixed with Fixomull<br>and Mefix | 940  | 118 | 12.60 | [8]  |
|                            | 2 | Pet. | 48     | 48, 96, 168        | Finn Chambers fixed<br>with Scanpor                                                                                  | 86   | 12  | 13.90 | [31] |
|                            | 2 | Pet. | 48     | n/a                | n/a                                                                                                                  | 59   | 19  | 32.20 | [9]  |
| Evernia Furfuracea Extract | 1 | Pet. | 48     | 48, 96             | Finn Chambers<br>applied on the back                                                                                 | 312  | 8   | 2.60  | [3]  |
|                            | 1 | Pet. | 24, 48 | 72                 | n/a                                                                                                                  | 1658 | 45  | 2.70  | [11] |
|                            | 1 | Pet. | 48     | 48, 72, 96,<br>168 | Finn Chambers (8<br>mm), applied on the                                                                              | 1503 | 50  | 3.30  | [2]  |

|                           |   |      |        |                 |                                                                                                       |      |     |       |      |
|---------------------------|---|------|--------|-----------------|-------------------------------------------------------------------------------------------------------|------|-----|-------|------|
| Evernia Prunastri Extract |   |      |        |                 | back with Scanpor tape                                                                                |      |     |       |      |
|                           | 1 | Pet. | 48     | 72, 96          | n/a                                                                                                   | 1947 | 129 | 6.60  | [12] |
|                           | 1 | Pet. | 48     | 72, 96          | n/a                                                                                                   | 319  | 23  | 7.20  | [37] |
|                           | 2 | Pet. | 48     | n/a             | TRUE Test and Finn Chambers                                                                           | 3119 | 16  | 0.50  | [5]  |
|                           | 2 | Pet. | 48     | 48, 96          | Finn Chambers applied on the back                                                                     | 312  | 3   | 1.00  | [3]  |
|                           | 2 | Pet. | 48     | 48              | Finn Chambers on Scanpor tape                                                                         | 422  | 6   | 1.40  | [1]  |
|                           | 1 | Pet. | 48     | 48, 72, 96, 168 | Finn Chambers (8 mm), applied on the back with Scanpor tape                                           | 1503 | 31  | 2.10  | [2]  |
|                           | 1 | Pet. | 24, 48 | 72              | n/a                                                                                                   | 2063 | 46  | 2.20  | [11] |
|                           | 2 | Pet. | 48     | 48, 96, 168     | Finn Chambers fixed with Scanpor                                                                      | 86   | 2   | 2.30  | [31] |
|                           | 2 | Pet. | 48     | 72, 96          | n/a                                                                                                   | 607  | 32  | 5.30  | [37] |
|                           | 5 | Pet. | 48     | 48, 120         | Finn Chambers (8 mm), applied on the upper back with Scanpor tape                                     | 167  | 22  | 13.20 | [13] |
|                           | 2 | Pet. | 48     | n/a             | n/a                                                                                                   | 59   | 14  | 23.70 | [9]  |
|                           | 2 | Pet. | 48     | 48, 72, 96      | Van der Bend patch test chambers applied on the back with Micropore and fixed with Fixomull and Mefix | 940  | 230 | 24.60 | [8]  |
|                           | 2 | Pet. | 48     | 48, 96          | Finn Chambers on Scanpor applied to the upper back                                                    | 40   | 12  | 30.00 | [43] |

|              |   |      |    |                 |                                                                                                       |        |     |       |      |
|--------------|---|------|----|-----------------|-------------------------------------------------------------------------------------------------------|--------|-----|-------|------|
| Farnesol     | 5 | Pet. | 48 | 48, 72, 96, 168 | Finn Chambers (8 mm), applied on the back with Scanpor tape                                           | 1502   | 5   | 0.30  | [2]  |
|              | 5 | Pet. | 48 | n/a             | TRUE Test and Finn Chambers                                                                           | 3119   | 14  | 0.40  | [5]  |
|              | 5 | Pet. | 48 | 48, 96          | Finn Chambers applied on Scanpor tape to the upper back of patients                                   | 308    | 2   | 0.60  | [6]  |
|              | 5 | Pet. | 48 | 72              | n/a                                                                                                   | 4238   | 38  | 0.90  | [11] |
|              | 5 | Pet. | 48 | 48, 96, 168     | Finn Chambers fixed with Scanpor                                                                      | 86     | 1   | 1.20  | [31] |
|              | 5 | Pet. | 48 | 48, 96          | Finn Chambers applied on the back                                                                     | 312    | 5   | 1.60  | [3]  |
|              | 5 | Pet. | 48 | 48, 72, 96      | Van der Bend patch test chambers applied on the back with Micropore and fixed with Fixomull and Mefix | 205    | 27  | 13.20 | [8]  |
|              | 5 | Pet. | 48 | 72, 96          | n/a                                                                                                   | 137    | 19  | 13.90 | [10] |
| Formaldehyde | 1 | Aq.  | 48 | 72, 168         | Finn Chambers on Scanpor tape                                                                         | 2598   | 5   | 0.20  | [47] |
|              | 1 | Aq.  | 48 | 72, 96          | n/a                                                                                                   | 14 728 | 133 | 0.90  | [10] |
|              | 1 | Aq.  | 48 | 72, 96          | Curatest Lohman&Rauscher, Rengsdorf Germany                                                           | 1927   | 21  | 1.10  | [15] |
|              | 1 | Aq.  | 48 | 72, 96          | n/a                                                                                                   | 10 124 | 104 | 1.10  | [10] |
|              | 1 | Aq.  | 48 | 48, 96          | Finn Chambers applied on Scanpor                                                                      | 308    | 4   | 1.30  | [6]  |

|   |      |    |                    |                                                                             |                                       |      |      |      |  |
|---|------|----|--------------------|-----------------------------------------------------------------------------|---------------------------------------|------|------|------|--|
|   |      |    |                    |                                                                             | tape to the upper<br>back of patients |      |      |      |  |
| 1 | Aq.  | 48 | 72, 96             | n/a                                                                         | 972                                   | 13   | 1.30 | [18] |  |
| 1 | Aq.  | 48 | 120, 168           | IQ Ultra Chambers<br>applied on the<br>patient's back                       | 1608                                  | 21   | 1.30 | [46] |  |
| 1 | Aq.  | 48 | 72, 96             | n/a                                                                         | 121 558                               | 1908 | 1.60 | [28] |  |
| 1 | Aq.  | 48 | 48, 96             | Komory IQ<br>Chambers<br>Chemotechnique<br>Diagnostics                      | 405                                   | 7    | 1.70 | [14] |  |
| 1 | Aq.  | 48 | 48, 96             | Finn Chambers fixed<br>with Scanpor tape                                    | 7838                                  | 135  | 1.70 | [35] |  |
| 1 | Aq.  | 48 | 72, 96             | n/a                                                                         | 2248                                  | 40   | 1.80 | [37] |  |
| 1 | Aq.  | 48 | 48, 72, 96,<br>168 | n/a                                                                         | 1397                                  | 27   | 1.90 | [35] |  |
| 1 | Aq.  | 48 | 48, 96             | Finn Chambers (8<br>mm) or IQ Chambers                                      | 9347                                  | 178  | 1.90 | [41] |  |
| 1 | Pet. | 48 | 48, 96             | Finn Chambers<br>secured with Scanpor<br>tape and left on the<br>back       | 3062                                  | 64   | 2.10 | [38] |  |
| 1 | Aq.  | 48 | 48, 72, 96,<br>168 | n/a                                                                         | 1993                                  | 44   | 2.20 | [24] |  |
| 1 | Aq.  | 48 | 72, 96             | n/a                                                                         | 27 907                                | 609  | 2.20 | [17] |  |
| 1 | Aq.  | 48 | 72, 96             | n/a                                                                         | 2047                                  | 48   | 2.30 | [37] |  |
| 1 | Aq.  | 48 | 72, 144, 168       | IQ Chambers from<br>Chemotechnique<br>Diagnostics AB<br>applied on the back | 3112                                  | 78   | 2.50 | [32] |  |
| 1 | Aq.  | 48 | 72                 | Finn Chambers and<br>TRUE Test applied<br>on the back                       | 3662                                  | 92   | 2.50 | [32] |  |

|   |     |    |                    |                                                                             |        |     |      |      |
|---|-----|----|--------------------|-----------------------------------------------------------------------------|--------|-----|------|------|
| 1 | Aq. | 48 | 48, 72, 96,<br>168 | n/a                                                                         | 1395   | 35  | 2.50 | [35] |
| 1 | Aq. | 48 | 72, 144, 168       | IQ Chambers from<br>Chemotechnique<br>Diagnostics AB<br>applied on the back | 3825   | 99  | 2.60 | [32] |
| 1 | Aq. | 48 | 48, 72             | Finn Chambers on<br>Scanpor applied on<br>the upper back                    | 373    | 11  | 2.90 | [33] |
| 1 | Aq. | 48 | 48, 72, 96,<br>168 | n/a                                                                         | 1471   | 43  | 2.90 | [25] |
| 1 | Aq. | 48 | 48, 96             | Aluminium<br>chambers carried out<br>on the upper back                      | 33     | 1   | 3.00 | [45] |
| 1 | Aq. | 48 | 48, 72, 96,<br>168 | Finn Chambers<br>(8mm) on Scanpor<br>tape                                   | 18 179 | 555 | 3.10 | [38] |
| 1 | Aq. | 48 | 96                 | Finn Chambers<br>applied to the back of<br>the patients                     | 618    | 20  | 3.20 | [44] |
| 1 | Aq. | 48 | 48, 96             | Finn Chambers on<br>Scanpor tape applied<br>on back                         | 125    | 4   | 3.20 | [23] |
| 1 | Aq. | 48 | 48, 96             | Finn Chambers on<br>Scanpor applied to<br>the upper back                    | 91     | 3   | 3.30 | [43] |
| 1 | Aq. | 48 | 48, 72, 96,<br>168 | n/a                                                                         | 1468   | 61  | 4.20 | [25] |
| 1 | Aq. | 48 | 48, 96             | Finn Chambers on<br>Scanpor tape to the<br>upper back                       | 6845   | 315 | 4.60 | [29] |
| 1 | Aq. | 48 | 48, 96             | IQ Chambers                                                                 | 327    | 16  | 4.90 | [34] |

|   |      |    |                 |                                                                                  |      |     |      |      |
|---|------|----|-----------------|----------------------------------------------------------------------------------|------|-----|------|------|
| 1 | Pet. | 48 | 120, 168        | IQ Ultra Chambers applied on the patient's back                                  | 1608 | 84  | 5.20 | [46] |
| 1 | Aq.  | 48 | 48, 72          | Finn Chambers applied on the upper back                                          | 2295 | 131 | 5.70 | [20] |
| 1 | Aq.  | 48 | 48, 96          | n/a                                                                              | 385  | 23  | 6.00 | [16] |
| 1 | Aq.  | 48 | 48, 96          | Finn Chambers on Scanpor tape applied to the areas of the back                   | 342  | 22  | 6.40 | [42] |
| 1 | Aq.  | 48 | 48, 72          | Aluminium patch test chambers mounted on Micropore carried out on the upper back | 200  | 13  | 6.50 | [26] |
| 1 | Aq.  | 48 | 48, 72, 96, 168 | Finn Chambers (8 mm), applied on the upper aspect of the back                    | 3093 | 241 | 7.80 | [21] |
| 1 | Aq.  | 48 | 48, 72, 96, 168 | Finn Chambers (8 mm), applied on the upper back with Scanpor tape                | 1321 | 104 | 7.90 | [19] |
| 1 | Aq.  | 48 | 48, 72, 96, 168 | Finn Chambers (8 mm), applied on the upper back with Scanpor tape                | 4909 | 412 | 8.40 | [19] |
| 1 | Aq.  | 48 | 48, 72, 96, 168 | Finn Chambers (8 mm), applied on the upper aspect of the back                    | 4445 | 400 | 9.00 | [21] |

|                 |   |      |    |                    |                                                                    |      |     |      |      |
|-----------------|---|------|----|--------------------|--------------------------------------------------------------------|------|-----|------|------|
|                 | 1 | Aq.  | 48 | 48, 72, 96,<br>168 | Finn Chambers (8 mm), applied on the upper aspect of the back      | 3836 | 345 | 9.00 | [21] |
| Fragrance Mix I | 8 | Pet. | 48 | 48, 96             | n/a                                                                | 50   | 1   | 2.00 | [16] |
|                 | 8 | Pet. | 48 | n/a                | TRUE Test and Finn Chambers                                        | 3119 | 82  | 2.60 | [5]  |
|                 | 7 | Pet. | 48 | 48, 96             | Finn Chambers on Scanpor tape applied on back                      | 125  | 5   | 4.00 | [23] |
|                 | 8 | Pet. | 48 | 48, 96, 168        | Finn Chambers fixed with Scanpor                                   | 1253 | 56  | 4.50 | [31] |
|                 | 8 | Pet. | 48 | 48, 96             | n/a                                                                | 385  | 19  | 4.90 | [16] |
|                 | 8 | Pet. | 48 | 72, 144, 168       | IQ Chambers from Chemotechnique Diagnostics AB applied on the back | 3112 | 162 | 5.20 | [32] |
|                 | 8 | Pet. | 48 | 48, 72, 96,<br>168 | n/a                                                                | 1991 | 128 | 6.40 | [24] |
|                 | 8 | Pet. | 48 | 48, 72, 96         | Finn Chambers (8 mm) on Scanpor tape                               | 1699 | 111 | 6.50 | [48] |
|                 | 8 | Pet. | 48 | 48, 72, 96,<br>168 | n/a                                                                | 1467 | 97  | 6.60 | [25] |
|                 | 8 | Pet. | 48 | 72, 168            | Finn Chambers on Scanpor tape                                      | 2598 | 174 | 6.70 | [47] |
|                 | 8 | Pet. | 48 | 72, 96             | n/a                                                                | 1896 | 150 | 6.90 | [30] |
|                 | 8 | Pet. | 48 | 48, 72             | Finn Chambers on Scanpor tape applied to upper back                | 2758 | 190 | 6.90 | [27] |
|                 | 8 | Pet. | 48 | 120, 168           | IQ Ultra Chambers applied on the patient's back                    | 1608 | 112 | 7.00 | [46] |

|   |      |    |                    |                                                                                                                      |        |      |       |      |
|---|------|----|--------------------|----------------------------------------------------------------------------------------------------------------------|--------|------|-------|------|
| 8 | Pet. | 48 | 72, 96             | n/a                                                                                                                  | 36 961 | 2694 | 7.29  | [12] |
| 8 | Pet. | 48 | 48, 72             | Aluminium patch<br>test chambers<br>mounted on<br>Micropore carried<br>out on the upper<br>back                      | 200    | 15   | 7.50  | [26] |
| 8 | Pet. | 48 | 48, 72             | Finn Chambers on<br>Sanpor applied on<br>the upper back                                                              | 373    | 30   | 8.00  | [33] |
| 8 | Pet. | 48 | 72, 96             | n/a                                                                                                                  | 700    | 57   | 8.10  | [30] |
| 8 | Pet. | 48 | 72, 96             | n/a                                                                                                                  | 10 124 | 859  | 8.40  | [10] |
| 8 | Pet. | 48 | 48, 72, 96,<br>168 | n/a                                                                                                                  | 1399   | 117  | 8.40  | [35] |
| 8 | Pet. | 48 | 96                 | Finn Chambers<br>applied to the back of<br>the patients                                                              | 618    | 54   | 8.70  | [44] |
| 8 | Pet. | 48 | 72, 96             | n/a                                                                                                                  | 972    | 91   | 9.40  | [18] |
| 8 | Pet. | 48 | 72, 96             | n/a                                                                                                                  | 2248   | 211  | 9.40  | [37] |
| 8 | Pet. | 48 | 48, 72, 96         | Van der Bend patch<br>test chambers<br>applied on the back<br>with Micropore and<br>fixed with Fixomull<br>and Mefix | 13 114 | 1259 | 9.60  | [8]  |
| 8 | Pet. | 48 | 48                 | Finn Chambers on<br>Scanpor tape                                                                                     | 422    | 41   | 9.70  | [1]  |
| 8 | Pet. | 48 | 72, 96             | n/a                                                                                                                  | 2007   | 205  | 10.00 | [37] |
| 8 | Pet. | 48 | 48, 72, 96,<br>168 | Finn Chambers (8<br>mm), applied on the<br>upper back with<br>Scanpor tape                                           | 1323   | 138  | 10.40 | [19] |

|   |      |    |                    |                                                                             |      |     |       |      |
|---|------|----|--------------------|-----------------------------------------------------------------------------|------|-----|-------|------|
| 8 | Pet. | 48 | 48, 72, 96,<br>168 | Finn Chambers (8<br>mm), applied on the<br>upper aspect of the<br>back      | 3092 | 322 | 10.40 | [21] |
| 8 | Pet. | 48 | 48, 72, 96,<br>168 | Finn Chambers (8<br>mm), applied on the<br>upper back with<br>Scanpor tape  | 4896 | 509 | 10.40 | [19] |
| 8 | Pet. | 48 | 72, 96             | n/a                                                                         | 700  | 57  | 11.10 | [30] |
| 8 | Pet. | 48 | 48, 96             | IQ Chambers                                                                 | 327  | 37  | 11.30 | [34] |
| 8 | Pet. | 48 | 48, 72, 96,<br>168 | Finn Chambers (8<br>mm), applied on the<br>upper aspect of the<br>back      | 940  | 106 | 11.30 | [4]  |
| 8 | Pet. | 48 | 48, 72, 96,<br>168 | Finn Chambers (8<br>mm), applied on the<br>upper back with<br>Scanpor tape  | 3844 | 434 | 11.30 | [19] |
| 8 | Pet. | 48 | 48, 72, 96,<br>168 | Finn Chambers (8<br>mm), applied on the<br>upper aspect of the<br>back      | 4439 | 510 | 11.50 | [21] |
| 8 | Pet. | 48 | 72, 144, 168       | IQ Chambers from<br>Chemotechnique<br>Diagnostics AB<br>applied on the back | 3112 | 548 | 17.60 | [32] |
| 8 | Pet. | 48 | 48, 96             | Finn Chambers<br>applied on the back                                        | 312  | 57  | 18.30 | [3]  |
| 8 | Pet. | 48 | 72, 144, 168       | IQ Chambers from<br>Chemotechnique<br>Diagnostics AB<br>applied on the back | 3825 | 757 | 19.80 | [32] |

|                         |     |      |    |             |                                                                               |        |     |       |      |
|-------------------------|-----|------|----|-------------|-------------------------------------------------------------------------------|--------|-----|-------|------|
|                         | 8   | Pet. | 48 | 72          | Finn Chambers and TRUE Test applied on the back                               | 3662   | 784 | 21.40 | [32] |
|                         | 8   | Pet. | 48 | 72, 120     | Finn Chambers on Scanpor                                                      | 41     | 11  | 27.00 | [21] |
|                         | 8   | Pet. | 48 | 48, 96      | Aluminium chambers carried out on the upper back                              | 33     | 9   | 27.20 | [45] |
|                         | 8   | Pet. | 48 | 48, 120     | Finn Chambers (8 mm), applied on the upper back with Scanpor tape             | 167    | 79  | 47.30 | [13] |
|                         | 8   | Pet. | 48 | 48, 120     | n/a                                                                           | 204    | 154 | 75.50 | [44] |
|                         | 8   | Pet. | 48 | 48, 120     | Finn Chambers secured to the skin with Scanpor tape applied to the upper back | 178    | 140 | 78.70 | [7]  |
|                         | 8   | Pet. | 48 | 48, 96      | Finn Chambers on Scanpor applied to the upper back                            | 91     | 85  | 93.00 | [43] |
| <b>Fragrance Mix II</b> | 14  | Pet. | 48 | 72, 168     | Finn Chambers on Scanpor tape                                                 | 2598   | 21  | 0.80  | [47] |
|                         | 2.8 | Pet. | 48 | 48, 72, 96  | Finn Chambers (8 mm) on Scanpor tape                                          | 1701   | 22  | 1.30  | [48] |
|                         | 14  | Pet. | 48 | 48, 96, 168 | Finn Chambers fixed with Scanpor                                              | 1253   | 7   | 1.50  | [31] |
|                         | 14  | Pet. | 48 | n/a         | TRUE Test and Finn Chambers                                                   | 3119   | 60  | 1.90  | [5]  |
|                         | 14  | Pet. | 48 | 72, 96, 168 | Finn Chambers (8 mm) on Scanpor tape                                          | 10 010 | 189 | 1.90  | [49] |

|    |      |        |                 |                                                                                                       |        |      |      |      |
|----|------|--------|-----------------|-------------------------------------------------------------------------------------------------------|--------|------|------|------|
| 14 | Pet. | 48     | 120, 168        | IQ Ultra Chambers applied on the patient's back                                                       | 1608   | 48   | 2.60 | [46] |
| 14 | Pet. | 48     | 48, 72, 96      | Finn Chambers (8 mm) on Scanpor tape                                                                  | 1701   | 50   | 2.90 | [48] |
| 14 | Pet. | 48     | 72, 96          | n/a                                                                                                   | 14 728 | 560  | 3.80 | [10] |
| 14 | Pet. | 48     | 48, 72, 96, 168 | n/a                                                                                                   | 1231   | 49   | 4.00 | [25] |
| 28 | Pet. | 48     | 48, 72, 96      | Finn Chambers (8 mm) on Scanpor tape                                                                  | 1701   | 70   | 4.10 | [48] |
| 14 | Pet. | 48     | 48, 72, 96, 168 | n/a                                                                                                   | 1233   | 54   | 4.40 | [25] |
| 14 | Pet. | 48     | 72, 96          | n/a                                                                                                   | 1895   | 86   | 4.40 | [30] |
| 14 | Pet. | 48     | 72, 96          | n/a                                                                                                   | 35 738 | 1748 | 4.89 | [12] |
| 14 | Pet. | 24, 48 | 72, 96          | n/a                                                                                                   | 35 633 | 1742 | 4.90 | [50] |
| 14 | Pet. | 48     | 48, 72, 96, 168 | Finn Chambers (8 mm), applied on the upper aspect of the back                                         | 192    | 10   | 5.20 | [4]  |
| 14 | Pet. | 48     | 72, 96          | n/a                                                                                                   | 10 124 | 559  | 5.50 | [10] |
| 14 | Pet. | 48     | 72, 120         | Finn Chambers on Scanpor                                                                              | 17     | 1    | 5.90 | [21] |
| 14 | Pet. | 48     | 48, 72, 96      | Van der Bend patch test chambers applied on the back with Micropore and fixed with Fixomull and Mefix | 3416   | 205  | 6.00 | [8]  |
| 14 | Pet. | 48     | 48, 72, 96, 168 | Finn Chambers (8 mm), applied on the upper aspect of the back                                         | 2713   | 165  | 6.10 | [21] |

|                       |    |      |    |                    |                                                                                                                      |      |     |       |      |
|-----------------------|----|------|----|--------------------|----------------------------------------------------------------------------------------------------------------------|------|-----|-------|------|
|                       | 14 | Pet. | 48 | 72, 96             | n/a                                                                                                                  | 2248 | 148 | 6.60  | [37] |
|                       | 14 | Pet. | 48 | 48, 72, 96,<br>168 | n/a                                                                                                                  | 1467 | 97  | 6.60  | [25] |
|                       | 14 | Pet. | 48 | 72, 96             | n/a                                                                                                                  | 698  | 33  | 7.00  | [30] |
|                       | 14 | Pet. | 48 | 72, 96             | n/a                                                                                                                  | 1625 | 121 | 7.40  | [37] |
|                       | 14 | Pet. | 48 | 48, 72, 96         | Finn Chambers (8<br>mm) on Scanpor tape                                                                              | 1701 | 128 | 7.50  | [48] |
|                       | 14 | Pet. | 48 | 48, 72, 96,<br>168 | n/a                                                                                                                  | 1470 | 115 | 7.80  | [25] |
|                       | 14 | Pet. | 48 | 48, 96             | Finn Chambers<br>applied on the back                                                                                 | 312  | 25  | 8.00  | [3]  |
| <b>Geraniol</b>       | 2  | Pet. | 48 | n/a                | TRUE Test and Finn<br>Chambers                                                                                       | 3119 | 13  | 0.40  | [5]  |
|                       | 1  | Pet. | 48 | 72                 | n/a                                                                                                                  | 2063 | 10  | 0.50  | [11] |
|                       | 2  | Pet. | 48 | 48, 96             | Finn Chambers<br>applied on the back                                                                                 | 312  | 8   | 2.60  | [3]  |
|                       | 5  | Pet. | 48 | 48, 120            | Finn Chambers (8<br>mm), applied on the<br>upper back with<br>Scanpor tape                                           | 167  | 5   | 3.00  | [13] |
|                       | 2  | Pet. | 48 | 48, 72, 96         | Van der Bend patch<br>test chambers<br>applied on the back<br>with Micropore and<br>fixed with Fixomull<br>and Mefix | 940  | 52  | 5.50  | [8]  |
|                       | 1  | Pet. | 48 | 72, 96             | n/a                                                                                                                  | 405  | 30  | 7.40  | [10] |
|                       | 2  | Pet. | 48 | n/a                | n/a                                                                                                                  | 59   | 11  | 18.60 | [9]  |
|                       | 2  | Pet. | 48 | 48, 96, 168        | Finn Chambers fixed<br>with Scanpor                                                                                  | 86   | 17  | 19.70 | [31] |
| <b>Hexyl cinnamal</b> | 10 | Pet. | 48 | n/a                | TRUE Test and Finn<br>Chambers                                                                                       | 3119 | 8   | 0.30  | [5]  |

|                           |    |      |        |                    |                                                                                                                      |      |    |      |      |
|---------------------------|----|------|--------|--------------------|----------------------------------------------------------------------------------------------------------------------|------|----|------|------|
|                           | 10 | Pet. | 48     | 48, 72, 96,<br>168 | Finn Chambers (8 mm),<br>applied on the back<br>with Scanpor tape                                                    | 1503 | 9  | 0.60 | [2]  |
|                           | 10 | Pet. | 48     | 48, 96             | Finn Chambers<br>applied on Scanpor<br>tape to the upper<br>back of patients                                         | 308  | 2  | 0.60 | [6]  |
|                           | 10 | Pet. | 48     | 72, 96             | n/a                                                                                                                  | 137  | 10 | 7.30 | [10] |
|                           | 10 | Pet. | 48     | 48, 72, 96         | Van der Bend patch<br>test chambers<br>applied on the back<br>with Micropore and<br>fixed with Fixomull<br>and Mefix | 205  | 20 | 9.70 | [8]  |
| <b>Hydroxycitronellal</b> | 2  | Pet. | 48     | n/a                | TRUE Test and Finn<br>Chambers                                                                                       | 3119 | 15 | 0.50 | [5]  |
|                           | 1  | Pet. | 48     | 48, 72, 96,<br>168 | Finn Chambers (8 mm),<br>applied on the back<br>with Scanpor tape                                                    | 1498 | 9  | 0.60 | [2]  |
|                           | 1  | Pet. | 24, 48 | 72                 | n/a                                                                                                                  | 2063 | 27 | 1.30 | [11] |
|                           | 1  | Pet. | 48     | 48, 96             | Finn Chambers on<br>Scanpor applied to<br>the upper back                                                             | 40   | 1  | 2.50 | [43] |
|                           | 2  | Pet. | 48     | 48, 72, 96         | Van der Bend patch<br>test chambers<br>applied on the back<br>with Micropore and<br>fixed with Fixomull<br>and Mefix | 940  | 24 | 2.60 | [8]  |

|                     |   |      |        |                 |                                                                                                                              |        |    |       |      |
|---------------------|---|------|--------|-----------------|------------------------------------------------------------------------------------------------------------------------------|--------|----|-------|------|
| Imidazolidynyl urea | 1 | Pet. | 48     | 48, 96          | Finn Chambers applied on the back                                                                                            | 312    | 12 | 3.80  | [3]  |
|                     | 1 | Pet. | 48     | 72, 96          | n/a                                                                                                                          | 607    | 26 | 4.30  | [37] |
|                     | 7 | Pet. | 48     | 48, 120         | n/a                                                                                                                          | 216    | 13 | 6.00  | [44] |
|                     | 5 | Pet. | 48     | 48, 96, 168     | Finn Chambers fixed with Scanpor                                                                                             | 86     | 6  | 6.90  | [31] |
|                     | 4 | Pet. | 48     | 48, 120         | Finn Chambers (8 mm), applied on the upper back with Scanpor tape                                                            | 167    | 23 | 13.80 | [13] |
|                     | 1 | Pet. | 48     | 72, 96          | n/a                                                                                                                          | 405    | 59 | 14.60 | [10] |
|                     | 2 | Pet. | 48     | n/a             | n/a                                                                                                                          | 59     | 23 | 40.00 | [9]  |
|                     | 2 | Pet. | 48     | 48, 96          | Komory IQ Chambers Chemotechnique Diagnostics                                                                                | 405    | 1  | 0.20  | [14] |
|                     | 2 | Pet. | 48     | 48, 96          | Finn Chambers applied on Scanpor tape to the upper back of patients                                                          | 308    | 1  | 0.30  | [6]  |
|                     | 2 | Pet. | 48     | 48, 96          | Finn Chambers secured with Scanpor tape and left on the back                                                                 | 3062   | 15 | 0.50  | [38] |
|                     | 2 | Pet. | 24, 48 | 72              | Finn Chambers (8 mm) on Scan-por (19 departments), Leukotest, Hal, Curatest, Haye, Intradex Service BV, Alphen aan den Rijn, | 11 452 | 64 | 0.60  | [17] |
|                     | 2 | Pet. | 48     | 48, 72, 96, 168 | n/a                                                                                                                          | 1398   | 8  | 0.60  | [35] |

|   |      |    |                    |                                                                            |        |     |      |      |
|---|------|----|--------------------|----------------------------------------------------------------------------|--------|-----|------|------|
| 2 | Pet. | 48 | 72, 96             | n/a                                                                        | 78 670 | 479 | 0.60 | [28] |
| 2 | Pet. | 48 | 72, 96             | Curatest<br>Lohman&Rauscher,<br>Rengsdorf Germany                          | 1927   | 13  | 0.70 | [15] |
| 1 | Pet. | 48 | 48, 96             | Finn Chambers<br>applied with Scanpor<br>tape to the upper<br>back         | 2298   | 16  | 0.70 | [40] |
| 2 | Pet. | 48 | 72, 96             | n/a                                                                        | 6981   | 55  | 0.70 | [10] |
| 2 | Pet. | 48 | 48, 72, 96,<br>168 | Finn Chambers<br>(8mm) on Scanpor<br>tape                                  | 11 271 | 93  | 0.80 | [38] |
| 2 | Pet. | 48 | 48, 96             | Finn Chambers (8<br>mm) or IQ Chambers                                     | 9360   | 84  | 0.90 | [41] |
| 2 | Pet. | 48 | 48, 96             | n/a                                                                        | 385    | 4   | 1.00 | [16] |
| 2 | Pet. | 48 | 48, 72             | Finn Chambers<br>applied on the upper<br>back                              | 2295   | 23  | 1.00 | [20] |
| 2 | Pet. | 48 | 48, 72             | Finn Chambers on<br>Scanpor tape applied<br>to upper back                  | 2758   | 27  | 1.00 | [27] |
| 2 | Aq.  | 48 | 48, 96             | Finn Chambers fixed<br>with Scanpor tape                                   | 3900   | 41  | 1.05 | [35] |
| 2 | Aq.  | 48 | 48, 72, 96,<br>168 | Finn Chambers (8<br>mm), applied on the<br>upper aspect of the<br>back     | 4447   | 58  | 1.30 | [21] |
| 2 | Aq.  | 48 | 48, 72, 96,<br>168 | Finn Chambers (8<br>mm), applied on the<br>upper back with<br>Scanpor tape | 1322   | 22  | 1.70 | [19] |

|   |      |    |                    |                                                                   |      |     |      |      |
|---|------|----|--------------------|-------------------------------------------------------------------|------|-----|------|------|
| 2 | Aq.  | 48 | 48, 72, 96,<br>168 | Finn Chambers (8 mm), applied on the upper aspect of the back     | 3069 | 52  | 1.70 | [21] |
| 2 | Aq.  | 48 | 48, 72, 96,<br>168 | Finn Chambers on Scanpor tape applied to a patient's upper back   | 943  | 17  | 1.80 | [4]  |
| 2 | Aq.  | 48 | 48, 72, 96,<br>168 | Finn Chambers (8 mm), applied on the upper back with Scanpor tape | 4909 | 88  | 1.80 | [19] |
| 2 | Pet. | 48 | 48, 96             | Finn Chambers on Scanpor tape to the upper back                   | 6845 | 130 | 1.90 | [29] |
| 2 | Pet. | 48 | 48, 96             | IQ Chambers                                                       | 327  | 7   | 2.10 | [34] |
| 2 | Aq.  | 48 | 48, 72, 96,<br>168 | Finn Chambers (8 mm), applied on the upper aspect of the back     | 3843 | 81  | 2.10 | [21] |
| 2 | Pet. | 48 | 48, 72, 96,<br>168 | Finn Chambers on Scanpor tape applied to a patient's upper back   | 941  | 22  | 2.30 | [4]  |
| 2 | Pet. | 48 | 48, 72, 96,<br>168 | Finn Chambers (8 mm), applied on the upper aspect of the back     | 3091 | 77  | 2.50 | [21] |
| 2 | Pet. | 48 | 48, 72, 96,<br>168 | Finn Chambers (8 mm), applied on the upper aspect of the back     | 3819 | 106 | 2.80 | [21] |

|                                    |     |      |    |                 |                                                                   |        |     |      |      |
|------------------------------------|-----|------|----|-----------------|-------------------------------------------------------------------|--------|-----|------|------|
|                                    | 2   | Pet. | 48 | 48, 96          | Finn Chambers (8 mm), applied on the upper back with Scanpor tape | 584    | 17  | 2.90 | [22] |
|                                    | 2   | Pet. | 48 | 48, 72, 96, 168 | Finn Chambers (8 mm), applied on the upper aspect of the back     | 4438   | 129 | 2.90 | [21] |
|                                    | 2   | Pet. | 48 | 48, 72, 96, 168 | Finn Chambers (8 mm), applied on the upper back with Scanpor tape | 4897   | 147 | 3.00 | [19] |
|                                    | 2   | Pet. | 48 | 48, 72, 96, 168 | Finn Chambers (8 mm), applied on the upper back with Scanpor tape | 1321   | 44  | 3.30 | [19] |
|                                    | 2   | Pet. | 48 | 48, 96          | Finn Chambers on Scanpor tape applied to the areas of the back    | 342    | 13  | 3.80 | [42] |
| <b>Iodopropynyl butylcarbamate</b> | 0.5 | Pet. | 48 | 48, 72, 96, 168 | Finn Chambers (8mm) on Scanpor tape                               | 10 085 | 41  | 0.40 | [38] |
|                                    | 0.1 | Pet. | 48 | 48, 96          | Finn Chambers (8 mm), applied on the upper back with Scanpor tape | 584    | 3   | 0.50 | [22] |
|                                    | 0.2 | Pet. | 48 | 48, 72, 96, 168 | n/a                                                               | 1451   | 8   | 0.60 | [25] |
|                                    | 0.2 | Pet. | 48 | 48, 96          | Komory IQ Chambers Chemotechnique Diagnostics                     | 405    | 3   | 0.70 | [14] |

|                   |     |      |        |                    |                                                                          |      |     |      |      |
|-------------------|-----|------|--------|--------------------|--------------------------------------------------------------------------|------|-----|------|------|
|                   | 0.2 | Pet. | 48     | 48, 72, 96,<br>168 | n/a                                                                      | 1390 | 10  | 0.70 | [35] |
|                   | 0.1 | Pet. | 48     | 48, 72, 96,<br>168 | Finn Chambers on<br>Scanpor tape applied<br>to a patient's upper<br>back | 871  | 6   | 0.70 | [4]  |
|                   | 0.2 | Pet. | 48     | 48, 72, 96,<br>168 | Finn Chambers (8<br>mm), applied on the<br>upper aspect of the<br>back   | 1229 | 12  | 0.98 | [21] |
|                   | 0.2 | Pet. | 48     | 72, 96             | n/a                                                                      | 6974 | 77  | 1.10 | [10] |
|                   | 0.2 | Pet. | 48     | 48, 72, 96,<br>168 | n/a                                                                      | 1452 | 17  | 1.20 | [25] |
|                   | 0.2 | Pet. | 48     | 72, 96             | n/a                                                                      | 1697 | 32  | 1.90 | [37] |
|                   | 0.5 | Pet. | 48     | 48, 72, 96,<br>168 | Finn Chambers (8<br>mm), applied on the<br>upper aspect of the<br>back   | 4435 | 106 | 2.40 | [21] |
|                   | 0.2 | Pet. | 48     | 48, 72, 96,<br>168 | Finn Chambers (8<br>mm), applied on the<br>upper aspect of the<br>back   | 118  | 4   | 3.40 | [21] |
| <b>Isoeugenol</b> | 2   | Pet. | 48     | n/a                | TRUE Test and Finn<br>Chambers                                           | 3119 | 21  | 0.70 | [5]  |
|                   | 1   | Pet. | 48     | 48, 72, 96,<br>168 | Finn Chambers (8<br>mm),<br>applied on the back<br>with Scanpor tape     | 1502 | 14  | 0.90 | [2]  |
|                   | 1   | Pet. | 24, 48 | 72                 | n/a                                                                      | 2063 | 26  | 1.30 | [11] |
|                   | 1   | Pet. | 48     | 48, 96             | Finn Chambers<br>applied on the back                                     | 312  | 7   | 2.20 | [3]  |
|                   | 1   | Pet. | 48     | 72, 96             | n/a                                                                      | 621  | 32  | 5.20 | [37] |

|                            |    |      |    |                 |                                                                                                       |      |     |       |      |
|----------------------------|----|------|----|-----------------|-------------------------------------------------------------------------------------------------------|------|-----|-------|------|
|                            | 2  | Pet. | 48 | 48, 96, 168     | Finn Chambers fixed with Scanpor                                                                      | 86   | 11  | 12.80 | [31] |
|                            | 4  | Pet. | 48 | 48, 120         | Finn Chambers (8 mm), applied on the upper back with Scanpor tape                                     | 167  | 23  | 13.80 | [13] |
|                            | 2  | Pet. | 48 | 48, 72, 96      | Van der Bend patch test chambers applied on the back with Micropore and fixed with Fixomull and Mefix | 940  | 160 | 17.00 | [8]  |
|                            | 1  | Pet. | 48 | 72, 96          | n/a                                                                                                   | 405  | 78  | 19.30 | [10] |
|                            | 1  | Pet. | 48 | 48, 96          | Finn Chambers on Scanpor applied to the upper back                                                    | 40   | 8   | 20.00 | [43] |
|                            | 2  | Pet. | 48 | n/a             | n/a                                                                                                   | 59   | 21  | 35.60 | [9]  |
| <b>Isopropyl myristate</b> | 20 | Pet. | 48 | 48, 72, 96, 168 | Finn Chambers (8 mm), applied on the upper back with Scanpor tape                                     | 3844 | 8   | 0.20  | [19] |
|                            | 20 | Pet. | 48 | 48, 72, 96, 168 | Finn Chambers (8 mm), applied on the upper aspect of the back                                         | 3086 | 6   | 0.20  | [21] |
|                            | 20 | Pet. | 48 | 48, 72, 96, 168 | Finn Chambers (8 mm), applied on the upper aspect of the back                                         | 944  | 4   | 0.40  | [4]  |
| <b>Lanolin</b>             | 30 | Pet. | 48 | 48, 72, 96, 168 | n/a                                                                                                   | 1399 | 12  | 0.90  | [35] |
|                            | 30 | Pet. | 48 | 72, 168         | Finn Chambers on Scanpor tape                                                                         | 2598 | 18  | 0.70  | [47] |

|                 |    |      |        |                    |                                                                              |        |     |      |      |
|-----------------|----|------|--------|--------------------|------------------------------------------------------------------------------|--------|-----|------|------|
|                 | 30 | Pet. | 48     | 48, 72, 96,<br>168 | n/a                                                                          | 1470   | 11  | 0.70 | [25] |
|                 | 30 | Pet. | 48     | 96                 | Finn Chambers<br>applied to the back of<br>the patients                      | 618    | 16  | 2.60 | [44] |
|                 | 30 | Pet. | 48     | 72, 96             | n/a                                                                          | 1900   | 33  | 1.70 | [30] |
|                 | 30 | Pet. | 48     | 72, 96             | n/a                                                                          | 14 728 | 265 | 1.80 | [10] |
|                 | 30 | Pet. | 48     | 48, 72, 96,<br>168 | Finn Chambers (8<br>mm), applied on the<br>upper aspect of the<br>back       | 935    | 26  | 2.80 | [4]  |
|                 | 30 | Pet. | 48     | 72, 120            | Finn Chambers on<br>Scanpor                                                  | 34     | 1   | 2.90 | [21] |
|                 | 30 | Pet. | 48     | 48, 96             | Finn Chambers on<br>Scanpor tape applied<br>on back                          | 125    | 0   | 0.00 | [23] |
|                 | 30 | Pet. | 48     | 48, 72, 96,<br>168 | n/a                                                                          | 1469   | 7   | 0.50 | [25] |
|                 | 30 | Pet. | 48     | 72, 96             | n/a                                                                          | 708    | 10  | 1.40 | [30] |
|                 | 30 | Pet. | 48     | 120, 168           | IQ Ultra Chambers<br>applied on the<br>patient's back                        | 1608   | 24  | 1.50 | [46] |
|                 | 30 | Pet. | 48     | 72, 96             | n/a                                                                          | 2058   | 44  | 2.10 | [37] |
|                 | 30 | Pet. | 48     | 72, 96             | n/a                                                                          | 10 124 | 246 | 2.40 | [10] |
| <b>Limonene</b> | 2  | Pet. | 24, 48 | 72                 | n/a                                                                          | 2396   | 3   | 0.10 | [11] |
|                 | 2  | Pet. | 48     | 72, 96             | n/a                                                                          | 1241   | 4   | 0.30 | [12] |
|                 | 2  | Pet. | 48     | 48, 96             | Finn Chambers<br>applied on Scanpor<br>tape to the upper<br>back of patients | 308    | 2   | 0.60 | [6]  |
|                 | 2  | Pet. | 48     | 48, 96             | Finn Chambers<br>applied on the back                                         | 312    | 2   | 0.60 | [3]  |
|                 |    |      |        |                    |                                                                              |        |     |      |      |

|                                                              |    |      |        |                    |                                                                                                       |        |     |      |      |
|--------------------------------------------------------------|----|------|--------|--------------------|-------------------------------------------------------------------------------------------------------|--------|-----|------|------|
| <b>Linalool</b>                                              | 10 | Pet. | 48     | 48, 72, 96,<br>168 | Finn Chambers (8 mm), applied on the back with Scanpor tape                                           | 1397   | 1   | 0.10 | [2]  |
|                                                              | 10 | Pet. | 48     | 72, 96             | n/a                                                                                                   | 985    | 2   | 0.20 | [12] |
|                                                              | 10 | Pet. | 24, 48 | 72                 | n/a                                                                                                   | 2401   | 7   | 0.30 | [11] |
|                                                              | 10 | Pet. | 48     | 48, 96             | Finn Chambers applied on Scanpor tape to the upper back of patients                                   | 308    | 2   | 0.60 | [6]  |
| <b>Hydroxyisohexyl 3-cyclohexene carboxaldehyde (Lyrall)</b> | 5  | Pet. | 48     | 72, 96, 168        | Finn Chambers (8 mm) on Scanpor tape                                                                  | 10 010 | 23  | 0.20 | [49] |
|                                                              | 5  | Pet. | 48     | 72, 168            | Finn Chambers on Scanpor tape                                                                         | 2598   | 13  | 0.50 | [47] |
|                                                              | 2  | Pet. | 48     | 48, 72, 96, 168    | Finn Chambers (8 mm), applied on the upper aspect of the back                                         | 444    | 5   | 1.10 | [4]  |
|                                                              | 5  | Pet. | 48     | 48, 72, 96, 168    | Finn Chambers (8 mm), applied on the back with Scanpor tape                                           | 1502   | 24  | 1.60 | [2]  |
|                                                              | 5  | Pet. | 48     | 48                 | Finn Chambers on Scanpor tape                                                                         | 422    | 7   | 1.70 | [1]  |
|                                                              | 5  | Pet. | 48     | 72, 96             | n/a                                                                                                   | 14 728 | 265 | 1.80 | [10] |
|                                                              | 5  | Pet. | 48     | 72, 96             | n/a                                                                                                   | 704    | 13  | 1.80 | [30] |
|                                                              | 5  | Pet. | 48     | 48, 72, 96         | Van der Bend patch test chambers applied on the back with Micropore and fixed with Fixomull and Mefix | 3927   | 82  | 2.10 | [8]  |

|                      |   |      |        |                    |                                                                                                                      |        |     |       |      |
|----------------------|---|------|--------|--------------------|----------------------------------------------------------------------------------------------------------------------|--------|-----|-------|------|
|                      | 5 | Pet. | 48     | 48, 72, 96,<br>168 | n/a                                                                                                                  | 1457   | 34  | 2.30  | [25] |
|                      | 5 | Pet. | 48     | 48, 72, 96,<br>168 | n/a                                                                                                                  | 1461   | 33  | 2.30  | [25] |
|                      | 5 | Pet. | 48     | 48, 72, 96,<br>168 | Finn Chambers (8<br>mm), applied on the<br>upper aspect of the<br>back                                               | 354    | 8   | 2.30  | [4]  |
|                      | 5 | Pet. | 48     | 72, 96             | n/a                                                                                                                  | 10 124 | 242 | 2.40  | [10] |
|                      | 5 | Pet. | 24, 48 | 72                 | n/a                                                                                                                  | 21 325 | 502 | 2.40  | [11] |
|                      | 5 | Pet. | 48     | 120, 168           | IQ Ultra Chambers<br>applied on the<br>patient's back                                                                | 1608   | 38  | 2.40  | [46] |
|                      | 5 | Pet. | 48     | 72, 96             | n/a                                                                                                                  | 37 271 | 898 | 2.40  | [12] |
|                      | 5 | Pet. | 48     | 48, 72, 96,<br>168 | n/a                                                                                                                  | 1913   | 56  | 2.80  | [24] |
|                      | 5 | Pet. | 48     | 72, 96             | n/a                                                                                                                  | 1905   | 5   | 2.80  | [30] |
|                      | 5 | Pet. | 48     | 48, 96             | Finn Chambers<br>applied on the back                                                                                 | 312    | 10  | 3.20  | [3]  |
|                      | 5 | Pet. | 48     | 48, 72, 96,<br>168 | n/a                                                                                                                  | 1392   | 51  | 3.70  | [35] |
|                      | 5 | Pet. | 48     | 72, 96             | n/a                                                                                                                  | 2043   | 93  | 4.60  | [37] |
|                      | 5 | Pet. | 48     | 48, 96, 168        | Finn Chambers fixed<br>with Scanpor                                                                                  | 86     | 7   | 8.10  | [31] |
|                      | 5 | Pet. | 48     | 48, 72, 96         | Van der Bend patch<br>test chambers<br>applied on the back<br>with Micropore and<br>fixed with Fixomull<br>and Mefix | 205    | 58  | 28.30 | [8]  |
| <b>m-Aminophenol</b> | 1 | Pet. | 48     | 48, 72, 168        | Finn Chambers on<br>Scanpor tape                                                                                     | 198    | 5   | 2.50  | [51] |

|                                                               |      |     |    |                 |                                                                                  |        |     |      |      |
|---------------------------------------------------------------|------|-----|----|-----------------|----------------------------------------------------------------------------------|--------|-----|------|------|
| <b>Methylchloroisothiazolinone</b>                            | 0.01 | Aq. | 48 | 48, 96          | IQ Chambers                                                                      | 327    | 13  | 4.00 | [34] |
| <b>Methylchloroisothiazolinone/<br/>Methylisothiazolinone</b> | 0.01 | Aq. | 48 | 48, 96          | Finn Chambers applied on Scanpor tape to the upper back of patients              | 308    | 1   | 0.30 | [6]  |
|                                                               | 0.5  | Aq. | 48 | 48, 96          | Finn Chambers on Scanpor tape                                                    | 125    | 1   | 0.80 | [23] |
|                                                               | 0.67 | Aq. | 48 | 48, 72          | Aluminium patch test chambers mounted on Micropore carried out on the upper back | 200    | 2   | 1.00 | [26] |
|                                                               | 0.01 | Aq. | 48 | 48, 72, 96, 168 | n/a                                                                              | 1993   | 24  | 1.20 | [24] |
|                                                               | 0.01 | Aq. | 48 | 72, 96          | Curatest Lohman&Rauscher, Rengsdorf Germany                                      | 1927   | 26  | 1.40 | [15] |
|                                                               | 0.01 | Aq. | 48 | 48, 72, 96, 168 | n/a                                                                              | 1471   | 24  | 1.60 | [25] |
|                                                               | 0.01 | Aq. | 48 | 48, 96          | Finn Chambers (8 mm) or IQ Chambers                                              | 9345   | 155 | 1.70 | [41] |
|                                                               | 0.01 | Aq. | 48 | 72, 168         | Finn Chambers on Scanpor tape                                                    | 2598   | 47  | 1.80 | [47] |
|                                                               | 0.01 | Aq. | 48 | 48, 72, 96, 168 | Finn Chambers (8mm) on Scanpor tape                                              | 18 058 | 323 | 1.80 | [38] |
|                                                               | 0.01 | Aq. | 48 | 72, 96          | n/a                                                                              | 14 728 | 295 | 2.00 | [10] |
|                                                               | 0.02 | Aq. | 48 | 72, 144, 168    | IQ Chambers from Chemotechnique Diagnostics AB applied on the back               | 3112   | 62  | 2.00 | [32] |

|      |     |        |                 |                                                                                                                              |         |      |      |      |
|------|-----|--------|-----------------|------------------------------------------------------------------------------------------------------------------------------|---------|------|------|------|
| 0.01 | Aq. | 48     | 72, 96          | n/a                                                                                                                          | 1906    | 43   | 2.10 | [30] |
| 0.01 | Aq. | 48     | 48, 72, 96, 168 | Finn Chambers (8 mm), applied on the upper back with Scanpor tape                                                            | 4895    | 113  | 2.30 | [19] |
| 0.01 | Aq. | 48     | 48, 96          | Finn Chambers on Scanpor tape to the upper back                                                                              | 5927    | 136  | 2.30 | [29] |
| 0.01 | Aq. | 48     | 72, 96          | n/a                                                                                                                          | 1906    | 43   | 2.30 | [30] |
| 0.01 | Aq. | 48     | 72, 96          | n/a                                                                                                                          | 121 136 | 2805 | 2.32 | [28] |
| 0.01 | Aq. | 48     | 48, 96          | Finn Chambers secured with Scanpor tape and left on the back                                                                 | 3062    | 73   | 2.40 | [38] |
| 0.01 | Aq. | 48     | 96              | Finn Chambers applied to the back of the patients                                                                            | 618     | 15   | 2.43 | [44] |
| 0.02 | Aq. | 48     | 72, 144, 168    | IQ Chambers from Chemotechnique Diagnostics AB applied on the back                                                           | 3825    | 92   | 2.40 | [32] |
| 0.01 | Aq. | 24, 48 | 72              | Finn Chambers (8 mm) on Scan-por (19 departments), Leukotest, Hal, Curatest, Haye, Intradex Service BV, Alphen aan den Rijn, | 27 331  | 717  | 2.60 | [17] |
| 0.01 | Aq. | 48     | 48, 72, 96, 168 | n/a                                                                                                                          | 1399    | 39   | 2.80 | [35] |
| 0.01 | Aq. | 48     | 48, 72, 96, 168 | Finn Chambers (8 mm), applied on the                                                                                         | 4437    | 124  | 2.80 | [21] |

|      |     |    |                 |                                                                   |        |     |      |      |  |
|------|-----|----|-----------------|-------------------------------------------------------------------|--------|-----|------|------|--|
|      |     |    |                 | upper aspect of the back                                          |        |     |      |      |  |
| 1.34 | Aq. | 48 | 48, 96          | Aluminium chambers carried out on the upper back                  | 33     | 1   | 3.00 | [45] |  |
| 0.01 | Aq. | 48 | 48, 72, 96, 168 | Finn Chambers (8 mm), applied on the upper aspect of the back     | 3740   | 112 | 3.00 | [21] |  |
| 0.01 | Aq. | 48 | 48, 72, 96, 168 | Finn Chambers (8 mm), applied on the upper back with Scanpor tape | 1312   | 41  | 3.10 | [19] |  |
| 0.02 | Aq. | 48 | 72              | Finn Chambers and TRUE Test applied on the back                   | 3662   | 114 | 3.10 | [32] |  |
| 0.01 | Aq. | 48 | 72, 96          | n/a                                                               | 10 124 | 304 | 3.20 | [10] |  |
| 0.01 | Aq. | 48 | 48, 72, 96, 168 | Finn Chambers (8 mm), applied on the upper aspect of the back     | 3091   | 105 | 3.40 | [21] |  |
| 0.01 | Aq. | 48 | 72, 96          | n/a                                                               | 6797   | 232 | 3.40 | [10] |  |
| 0.01 | Aq. | 48 | 48, 96          | Komory IQ Chambers Chemotechnique Diagnostics                     | 405    | 14  | 3.50 | [14] |  |
| 0.01 | Aq. | 48 | 48, 96          | IQ Chambers                                                       | 327    | 13  | 4.00 | [34] |  |
| 0.01 | Aq. | 48 | 48, 72, 96, 168 | n/a                                                               | 1469   | 61  | 4.20 | [25] |  |
| 0.01 | Aq. | 48 | 48, 72          | Finn Chambers on Sanpor applied on the upper back                 | 208    | 9   | 4.30 | [33] |  |

|                                         |      |      |    |                    |                                                                            |      |     |      |      |
|-----------------------------------------|------|------|----|--------------------|----------------------------------------------------------------------------|------|-----|------|------|
| Methyldibromo<br>Glutaronitrile (MDBGN) | 0.01 | Aq.  | 48 | 48, 72, 96,<br>168 | Finn Chambers on<br>Scanpor tape applied<br>to a patient's upper<br>back   | 935  | 40  | 4.30 | [4]  |
|                                         | 0.01 | Aq.  | 48 | 48, 96             | Finn Chambers on<br>Scanpor applied to<br>the upper back                   | 91   | 4   | 4.40 | [43] |
|                                         | 0.01 | Aq.  | 48 | 72, 96             | n/a                                                                        | 2248 | 99  | 4.40 | [37] |
|                                         | 0.01 | Aq.  | 48 | 72, 96             | n/a                                                                        | 2048 | 103 | 5.00 | [37] |
|                                         | 0.02 | Aq.  | 48 | 48, 96             | Finn Chambers (8<br>mm), applied on the<br>upper back with<br>Scanpor tape | 584  | 32  | 5.50 | [22] |
|                                         | 0.01 | Pet. | 48 | 120, 168           | IQ Ultra Chambers<br>applied on the<br>patient's back                      | 1608 | 88  | 5.50 | [46] |
|                                         | 0.67 | Aq.  | 48 | 48, 72             | Finn Chambers<br>applied on the upper<br>back                              | 2295 | 126 | 5.50 | [20] |
|                                         | 0.01 | Aq.  | 48 | 72, 96             | n/a                                                                        | 706  | 39  | 5.52 | [30] |
|                                         | 0.01 | Aq.  | 48 | 48, 96             | n/a                                                                        | 50   | 3   | 5.90 | [16] |
|                                         | 0.01 | Aq.  | 48 | 48, 96             | n/a                                                                        | 385  | 23  | 6.00 | [16] |
|                                         | 0.30 | Pet. | 48 | 72, 168            | Finn Chambers on<br>Scanpor tape                                           | 2598 | 18  | 0.70 | [47] |
|                                         | 0.30 | Pet. | 48 | 48, 96             | Finn Chambers (8<br>mm) or IQ Chambers                                     | 8496 | 93  | 1.10 | [41] |
|                                         | 0.30 | Pet. | 48 | 48, 96             | Komory IQ<br>Chambers<br>Chemotechnique<br>Diagnostics                     | 405  | 7   | 1.70 | [14] |
|                                         | 0.30 | Pet. | 48 | 72, 96             | n/a                                                                        | 1374 | 24  | 1.80 | [30] |
|                                         | 0.30 | Pet. | 48 | 48, 72, 96,<br>168 | n/a                                                                        | 1858 | 34  | 1.80 | [24] |

|                              |      |      |    |                    |                                                        |        |      |      |       |
|------------------------------|------|------|----|--------------------|--------------------------------------------------------|--------|------|------|-------|
|                              | 0.30 | Pet. | 48 | 72, 96             | n/a                                                    | 525    | 14   | 2.70 | [30]  |
|                              | 0.30 | Pet. | 48 | 72, 96             | n/a                                                    | 14 728 | 412  | 2.80 | [10]  |
|                              | 0.30 | Pet. | 48 | 48, 72, 96,<br>168 | Finn Chambers<br>(8mm) on Scanpor<br>tape              | 7511   | 276  | 3.70 | [38]  |
|                              | 0.30 | Pet. | 48 | 48, 72, 96,<br>168 | n/a                                                    | 1398   | 61   | 4.40 | [35]  |
|                              | 0.30 | Pet. | 48 | 48, 72, 96,<br>168 | n/a                                                    | 1469   | 65   | 4.40 | [25]  |
|                              | 0.30 | Pet. | 48 | 72, 96             | n/a                                                    | 1680   | 79   | 4.70 | [37]  |
|                              | 0.30 | Pet. | 48 | 72, 96             | n/a                                                    | 53 545 | 2695 | 5.00 | [28]  |
|                              | 0.30 | Pet. | 48 | 48, 72, 96,<br>168 | n/a                                                    | 1466   | 89   | 6.10 | [25]  |
| <b>Methylisothiazolinone</b> | 0.05 | Aq.  | 48 | 72, 96             | n/a                                                    | 13 433 | 215  | 1.60 | [28]  |
|                              | 0.01 | Aq.  | 48 | 72, 96             | n/a                                                    | 933    | 18   | 1.90 | Britt |
|                              | 0.05 | Aq.  | 48 | 48, 72, 96,<br>168 | n/a                                                    | 1060   | 25   | 2.40 | [35]  |
|                              | 0.05 | Aq.  | 48 | 72, 96             | n/a                                                    | 4089   | 157  | 3.80 | [10]  |
|                              | 0.05 | Aq.  | 48 | 48, 72, 96,<br>168 | n/a                                                    | 919    | 37   | 4.00 | [35]  |
|                              | 0.05 | Aq.  | 48 | 72, 96             | n/a                                                    | 1025   | 44   | 4.29 | [37]  |
|                              | 0.02 | Aq.  | 48 | 48, 96             | Komory IQ<br>Chambers<br>Chemotechnique<br>Diagnostics | 405    | 19   | 4.70 | [14]  |
|                              | 0.02 | Aq.  | 48 | 120, 168           | IQ Ultra Chambers<br>applied on the<br>patient's back  | 1608   | 112  | 7.00 | [46]  |
| <b>Mercaptobenzothiazole</b> | 2    | Pet. | 48 | 72, 96             | n/a                                                    | 1904   | 3    | 0.20 | [30]  |
|                              | 2    | Pet. | 48 | 72, 168            | Finn Chambers on<br>Scanpor tape                       | 2598   | 8    | 0.30 | [47]  |

|              |   |      |    |                 |                                                                    |      |    |      |      |
|--------------|---|------|----|-----------------|--------------------------------------------------------------------|------|----|------|------|
|              | 2 | Pet. | 48 | 72, 144, 168    | IQ Chambers from Chemotechnique Diagnostics AB applied on the back | 3825 | 15 | 0.40 | [32] |
|              | 2 | Pet. | 48 | 72, 144, 168    | IQ Chambers from Chemotechnique Diagnostics AB applied on the back | 3112 | 13 | 0.40 | [32] |
|              | 2 | Pet. | 48 | 48, 72, 96, 168 | n/a                                                                | 1398 | 9  | 0.60 | [35] |
|              | 2 | Pet. | 48 | 72              | Finn Chambers and TRUE Test applied on the back                    | 3662 | 22 | 0.60 | [32] |
|              | 2 | Pet. | 48 | 48, 72, 96, 168 | n/a                                                                | 1993 | 12 | 0.60 | [24] |
|              | 2 | Pet. | 48 | 72, 96          | n/a                                                                | 703  | 4  | 0.60 | [30] |
|              | 2 | Pet. | 48 | 48, 72          | Finn Chambers on Sanpor applied on the upper back                  | 337  | 3  | 0.90 | [33] |
|              | 2 | Pet. | 48 | 48, 72, 96, 168 | n/a                                                                | 1471 | 14 | 1.00 | [25] |
|              | 2 | Pet. | 48 | 48, 72, 96, 168 | n/a                                                                | 1468 | 16 | 1.10 | [25] |
|              | 2 | Pet. | 48 | 72, 120         | Finn Chambers on Scanpor                                           | 34   | 1  | 2.90 | [21] |
|              | 2 | Pet. | 48 | 96              | Finn Chambers applied to the back of the patients                  | 618  | 20 | 3.20 | [44] |
| Mercapto mix | 2 | Pet. | 48 | 72, 168         | Finn Chambers on Scanpor tape                                      | 2598 | 5  | 0.20 | [47] |
|              | 2 | Pet. | 48 | 48, 96          | IQ Chambers                                                        | 327  | 1  | 0.30 | [34] |
|              | 2 | Pet. | 48 | 48, 72, 96, 168 | Finn Chambers (8 mm), applied on the                               | 3091 | 15 | 0.50 | [21] |

|                                 |    |      |    |                 |                                                                                  |      |    |      |      |
|---------------------------------|----|------|----|-----------------|----------------------------------------------------------------------------------|------|----|------|------|
|                                 |    |      |    |                 | upper aspect of the back                                                         |      |    |      |      |
|                                 | 2  | Pet. | 48 | 48, 72, 96, 168 | Finn Chambers (8 mm), applied on the upper back with Scanpor tape                | 3842 | 23 | 0.60 | [19] |
|                                 | 2  | Pet. | 48 | 48, 96          | Finn Chambers on Scanpor tape applied on back                                    | 125  | 1  | 0.80 | [23] |
|                                 | 2  | Pet. | 48 | 48, 72, 96, 168 | n/a                                                                              | 1471 | 13 | 0.90 | [25] |
|                                 | 2  | Pet. | 48 | 48, 72, 96, 168 | n/a                                                                              | 1398 | 14 | 1.00 | [35] |
|                                 | 2  | Pet. | 48 | 48, 72          | Finn Chambers on Sanpor applied on the upper back                                | 373  | 6  | 1.60 | [33] |
|                                 | 2  | Pet. | 48 | 48, 72          | Aluminium patch test chambers mounted on Micropore carried out on the upper back | 200  | 10 | 5.00 | [26] |
| <b>Myroxylon pereirae resin</b> | 25 | Pet. | 48 | n/a             | TRUE Test and Finn Chambers                                                      | 3119 | 23 | 0.70 | [5]  |
|                                 | 25 | Pet. | 48 | 48, 72          | Aluminium patch test chambers mounted on Micropore carried out on the upper back | 200  | 3  | 1.50 | [26] |
|                                 | 25 | Pet. | 48 | 48, 96          | Finn Chambers on Scanpor tape applied on back                                    | 125  | 2  | 1.60 | [23] |

|    |      |    |                    |                                                                             |        |     |      |      |
|----|------|----|--------------------|-----------------------------------------------------------------------------|--------|-----|------|------|
| 25 | Pet. | 48 | 48, 72, 96,<br>168 | n/a                                                                         | 1469   | 30  | 2.00 | [25] |
| 25 | Pet. | 48 | 48, 72, 96,<br>168 | n/a                                                                         | 1471   | 35  | 2.40 | [25] |
| 25 | Pet. | 48 | 48, 72, 96,<br>168 | n/a                                                                         | 1993   | 60  | 3.00 | [24] |
| 25 | Pet. | 48 | 48, 72 96,<br>168  | n/a                                                                         | 1397   | 42  | 3.00 | [35] |
| 25 | Pet. | 48 | 48, 72 96,<br>168  | n/a                                                                         | 1400   | 43  | 3.10 | [35] |
| 25 | Pet. | 48 | 48, 96             | n/a                                                                         | 50     | 2   | 4.00 | [16] |
| 25 | Pet. | 48 | 48, 72             | Finn Chambers on<br>Sanpor applied on<br>the upper back                     | 373    | 15  | 4.00 | [33] |
| 25 | Pet. | 48 | 72, 144, 168       | IQ Chambers from<br>Chemotechnique<br>Diagnostics AB<br>applied on the back | 3112   | 149 | 4.80 | [32] |
| 25 | Pet. | 48 | 72                 | Finn Chambers and<br>TRUE Test applied<br>on the back                       | 3662   | 179 | 4.90 | [32] |
| 25 | Pet. | 48 | 72, 96             | n/a                                                                         | 14 728 | 795 | 5.40 | [10] |
| 25 | Pet. | 48 | 48, 96             | n/a                                                                         | 385    | 21  | 5.50 | [16] |
| 25 | Pet. | 48 | 120, 168           | IQ Ultra Chambers<br>applied on the<br>patient's back                       | 1608   | 90  | 5.60 | [46] |
| 25 | Pet. | 48 | 72, 96             | n/a                                                                         | 1898   | 131 | 6.10 | [30] |
| 25 | Pet. | 48 | 48, 96, 168        | Finn Chambers fixed<br>with Scanpor                                         | 1253   | 80  | 6.40 | [31] |
| 25 | Pet. | 48 | 72, 96             | n/a                                                                         | 972    | 63  | 6.50 | [18] |

|    |      |    |                 |                                                                    |        |      |       |      |
|----|------|----|-----------------|--------------------------------------------------------------------|--------|------|-------|------|
| 25 | Pet. | 48 | 72, 144, 168    | IQ Chambers from Chemotechnique Diagnostics AB applied on the back | 3825   | 249  | 6.50  | [32] |
| 25 | Pet. | 48 | 48, 96          | Finn Chambers secured with Scanpor tape and left on the back       | 3062   | 205  | 6.70  | [38] |
| 25 | Pet. | 48 | 48, 96          | Finn Chambers applied on the back                                  | 312    | 21   | 6.80  | [3]  |
| 25 | Pet. | 48 | 72, 96          | n/a                                                                | 705    | 37   | 6.90  | [30] |
| 25 | Pet. | 48 | 72, 96          | n/a                                                                | 1898   | 131  | 6.90  | [30] |
| 25 | Pet. | 48 | 72, 96          | n/a                                                                | 2248   | 157  | 7.00  | [37] |
| 25 | Pet. | 48 | 72, 96          | n/a                                                                | 2048   | 145  | 7.10  | [37] |
| 25 | Pet. | 48 | 48              | Finn Chambers on Scanpor tape                                      | 422    | 31   | 7.30  | [1]  |
| 25 | Pet. | 48 | 72, 96          | n/a                                                                | 10 124 | 755  | 7.40  | [10] |
| 25 | Pet. | 48 | 72, 96          | n/a                                                                | 36 919 | 2950 | 8.00  | [12] |
| 25 | Pet. | 48 | 48, 72, 96, 168 | Finn Chambers (8 mm), applied on the upper back with Scanpor tape  | 1322   | 149  | 11.30 | [19] |
| 25 | Pet. | 48 | 48, 72, 96, 168 | Finn Chambers (8 mm), applied on the upper back with Scanpor tape  | 4910   | 569  | 11.60 | [19] |
| 25 | Pet. | 48 | 48, 72, 96, 168 | Finn Chambers (8 mm), applied on the upper aspect of the back      | 4449   | 529  | 11.90 | [21] |
| 25 | Pet. | 48 | 48, 72, 96, 168 | Finn Chambers (8 mm), applied on the                               | 936    | 116  | 12.40 | [4]  |

|                  |    |      |    |                 |                                                                   |      |     |       |      |
|------------------|----|------|----|-----------------|-------------------------------------------------------------------|------|-----|-------|------|
|                  |    |      |    |                 | upper aspect of the back                                          |      |     |       |      |
|                  | 25 | Pet. | 48 | 48, 72, 96, 168 | Finn Chambers (8 mm), applied on the upper aspect of the back     | 3082 | 388 | 12.60 | [21] |
|                  | 25 | Pet. | 48 | 48, 72, 96, 168 | Finn Chambers (8 mm), applied on the upper aspect of the back     | 3837 | 526 | 13.70 | [21] |
|                  | 25 | Pet. | 48 | 48, 96          | Finn Chambers on Scanpor applied to the upper back                | 91   | 19  | 20.90 | [43] |
|                  | 25 | Pet. | 48 | 72, 120         | Finn Chambers on Scanpor                                          | 41   | 10  | 24.00 | [21] |
|                  | 25 | Pet. | 48 | 48, 120         | Finn Chambers (8 mm), applied on the upper back with Scanpor tape | 125  | 34  | 27.20 | [13] |
| Neomycin sulfate | 20 | Pet. | 48 | 48, 72          | Finn Chambers on Scanpor tape applied to upper back               | 2758 | 17  | 0.60  | [27] |
|                  | 20 | Pet. | 48 | 72, 120         | Finn Chambers on Scanpor                                          | 34   | 4   | 11.80 | [21] |
|                  | 20 | Pet. | 48 | 48, 72, 96, 168 | Finn Chambers (8 mm), applied on the upper back with Scanpor tape | 3834 | 452 | 11.80 | [19] |
|                  | 20 | Pet. | 48 | 72              | Finn Chambers and TRUE Test applied on the back                   | 3662 | 70  | 1.90  | [32] |

|    |      |    |                 |                                                                                  |      |     |       |      |
|----|------|----|-----------------|----------------------------------------------------------------------------------|------|-----|-------|------|
| 20 | Pet. | 48 | 48, 96          | Finn Chambers on Scanpor applied to the upper back                               | 91   | 9   | 9.90  | [43] |
| 20 | Pet. | 48 | 72, 144, 168    | IQ Chambers from Chemotechnique Diagnostics AB applied on the back               | 3112 | 12  | 0.40  | [32] |
| 20 | Pet. | 48 | 72, 168         | Finn Chambers on Scanpor tape                                                    | 2598 | 13  | 0.50  | [47] |
| 20 | Pet. | 48 | 72, 144, 168    | IQ Chambers from Chemotechnique Diagnostics AB applied on the back               | 3825 | 46  | 1.20  | [32] |
| 20 | Pet. | 48 | 48, 72, 96, 168 | n/a                                                                              | 1468 | 17  | 1.20  | [25] |
| 20 | Pet. | 48 | 48, 72          | Aluminium patch test chambers mounted on Micropore carried out on the upper back | 200  | 10  | 5.00  | [26] |
| 20 | Pet. | 48 | 48, 72          | Finn Chambers on Sanpor applied on the upper back                                | 373  | 19  | 5.10  | [33] |
| 20 | Pet. | 48 | 48, 96          | Finn Chambers on Scanpor tape applied on back                                    | 125  | 8   | 6.40  | [23] |
| 20 | Pet. | 48 | 96              | Finn Chambers applied to the back of the patients                                | 618  | 45  | 7.30  | [44] |
| 20 | Pet. | 48 | 48, 72, 96, 168 | Finn Chambers (8 mm), applied on the                                             | 3085 | 318 | 10.30 | [21] |

|                      |    |      |    |                 |                                                                    |        |    |       |      |
|----------------------|----|------|----|-----------------|--------------------------------------------------------------------|--------|----|-------|------|
|                      |    |      |    |                 | upper aspect of the back                                           |        |    |       |      |
| <b>o-Aminophenol</b> | 1  | Pet. | 48 | 48, 72, 168     | Finn Chambers on Scanpor tape                                      | 197    | 37 | 18.80 | [51] |
| <b>p-Aminophenol</b> | 1  | Pet. | 48 | 48, 72, 168     | Finn Chambers on Scanpor tape                                      | 200    | 21 | 10.50 | [51] |
| <b>Paraben Mix</b>   | 16 | Pet. | 48 | 48, 96          | Komory IQ Chambers Chemotechnique Diagnostics                      | 405    | 1  | 0.20  | [14] |
|                      | 16 | Pet. | 48 | 48, 72, 96, 168 | n/a                                                                | 1993   | 6  | 0.30  | [24] |
|                      | 16 | Pet. | 48 | 48, 72, 96, 168 | n/a                                                                | 1471   | 4  | 0.30  | [25] |
|                      | 16 | Pet. | 48 | 48, 72, 96, 168 | n/a                                                                | 1402   | 4  | 0.30  | [35] |
|                      | 16 | Pet. | 48 | 48, 72, 96, 168 | n/a                                                                | 1399   | 4  | 0.30  | [35] |
|                      | 16 | Pet. | 48 | 72, 144, 168    | IQ Chambers from Chemotechnique Diagnostics AB applied on the back | 3112   | 9  | 0.30  | [32] |
|                      | 16 | Pet. | 48 | 72, 144, 168    | IQ Chambers from Chemotechnique Diagnostics AB applied on the back | 3825   | 15 | 0.40  | [32] |
|                      | 16 | Pet. | 48 | 72              | Finn Chambers and TRUE Test applied on the back                    | 3662   | 18 | 0.50  | [32] |
|                      | 16 | Pet. | 48 | 48, 72, 96, 168 | Finn Chambers (8mm) on Scanpor tape                                | 18 178 | 97 | 0.50  | [38] |

|    |      |    |                 |                                                                     |        |     |      |      |
|----|------|----|-----------------|---------------------------------------------------------------------|--------|-----|------|------|
| 16 | Pet. | 48 | 48, 72          | Finn Chambers on Scanpor tape applied to upper back                 | 2758   | 15  | 0.50 | [27] |
| 16 | Pet. | 48 | 48, 96          | Finn Chambers applied on Scanpor tape to the upper back of patients | 308    | 2   | 0.60 | [6]  |
| 16 | Pet. | 48 | 48, 72, 96, 168 | n/a                                                                 | 1469   | 10  | 0.70 | [25] |
| 16 | Pet. | 48 | 120, 168        | IQ Ultra Chambers applied on the patient's back                     | 1608   | 11  | 0.70 | [46] |
| 16 | Pet. | 48 | 72, 96          | n/a                                                                 | 14 728 | 133 | 0.90 | [10] |
| 16 | Pet. | 48 | 48, 96          | IQ Chambers                                                         | 327    | 3   | 0.90 | [34] |
| 16 | Pet. | 48 | 72, 96          | n/a                                                                 | 10 124 | 103 | 1.00 | [10] |
| 16 | Pet. | 48 | 48, 72, 96, 168 | Finn Chambers on Scanpor tape applied to a patient's upper back     | 941    | 9   | 1.00 | [4]  |
| 16 | Pet. | 48 | 48, 96          | Finn Chambers (8 mm) or IQ Chambers                                 | 8873   | 89  | 1.00 | [41] |
| 16 | Pet. | 48 | 72, 168         | Finn Chambers on Scanpor tape                                       | 2598   | 26  | 1.00 | [47] |
| 16 | Pet. | 48 | 72, 96          | Curatest Lohman&Rauscher, Rengsdorf Germany                         | 1927   | 21  | 1.10 | [15] |
| 16 | Pet. | 48 | 48, 96          | Finn Chambers secured with Scanpor tape and left on the back        | 3062   | 34  | 1.10 | [38] |
| 16 | Pet. | 48 | 48, 96          | Finn Chambers on Scanpor tape to the upper back                     | 6845   | 75  | 1.10 | [29] |

|    |      |        |                    |                                                                                                                              |         |      |      |      |
|----|------|--------|--------------------|------------------------------------------------------------------------------------------------------------------------------|---------|------|------|------|
| 12 | Pet. | 48     | 48, 72, 96,<br>168 | Finn Chambers (8 mm), applied on the upper aspect of the back                                                                | 4439    | 53   | 1.20 | [21] |
| 16 | Pet. | 48     | 72, 96             | n/a                                                                                                                          | 121 247 | 1752 | 1.40 | [28] |
| 16 | Pet. | 48     | 48, 72, 96,<br>168 | Finn Chambers (8 mm), applied on the upper back with Scanpor tape                                                            | 1318    | 21   | 1.60 | [19] |
| 16 | Pet. | 24, 48 | 72                 | Finn Chambers (8 mm) on Scan-por (19 departments), Leukotest, Hal, Curatest, Haye, Intradex Service BV, Alphen aan den Rijn, | 22 602  | 364  | 1.60 | [17] |
| 15 | Pet. | 48     | 48, 72             | Finn Chambers applied on the upper back                                                                                      | 2295    | 39   | 1.70 | [20] |
| 16 | Pet. | 48     | 48, 72, 96,<br>168 | Finn Chambers (8 mm), applied on the upper back with Scanpor tape                                                            | 3841    | 65   | 1.70 | [19] |
| 16 | Pet. | 48     | 48, 72, 96,<br>168 | Finn Chambers (8 mm), applied on the upper aspect of the back                                                                | 3090    | 52   | 1.70 | [21] |
| 16 | Pet. | 48     | 48, 72             | Aluminium patch test chambers mounted on Micropore carried out on the upper back                                             | 200     | 4    | 2.00 | [26] |

|                       |    |      |        |                 |                                                                                                                              |        |    |      |      |
|-----------------------|----|------|--------|-----------------|------------------------------------------------------------------------------------------------------------------------------|--------|----|------|------|
|                       | 16 | Pet. | 48     | 96              | Finn Chambers applied to the back of the patients                                                                            | 618    | 19 | 3.00 | [44] |
|                       | 16 | Pet. | 48     | 48, 96          | Finn Chambers (8 mm), applied on the upper back with Scanpor tape                                                            | 584    | 18 | 3.10 | [22] |
|                       | 16 | Pet. | 48     | 48, 96          | Finn Chambers on Scanpor applied to the upper back                                                                           | 91     | 3  | 3.30 | [43] |
|                       | 16 | Pet. | 48     | 48, 72          | Finn Chambers on Sanpor applied on the upper back                                                                            | 373    | 19 | 5.10 | [33] |
|                       | 16 | Pet. | 48     | 48, 96          | Aluminium chambers carried out on the upper back                                                                             | 33     | 3  | 9.10 | [45] |
| <b>Phenoxyethanol</b> | 1  | Pet. | 24, 48 | 72              | Finn Chambers (8 mm) on Scan-por (19 departments), Leukotest, Hal, Curatest, Haye, Intradex Service BV, Alphen aan den Rijn, | 11 120 | 14 | 0.10 | [17] |
|                       | 1  | Pet. | 48     | 48, 72, 96, 168 | Finn Chambers (8 mm), applied on the upper aspect of the back                                                                | 2700   | 3  | 0.10 | [21] |
|                       | 1  | Pet. | 48     | 48, 72, 96, 168 | Finn Chambers (8 mm), applied on the upper back with Scanpor tape                                                            | 4887   | 10 | 0.20 | [19] |

|                           |   |      |    |                    |                                                                             |      |    |      |      |
|---------------------------|---|------|----|--------------------|-----------------------------------------------------------------------------|------|----|------|------|
|                           | 1 | Pet. | 48 | 72, 96             | Curatest<br>Lohman&Rauscher,<br>Rengsdorf Germany                           | 1927 | 6  | 0.30 | [15] |
|                           | 1 | Pet. | 48 | 72, 96             | n/a                                                                         | 6932 | 20 | 0.30 | [28] |
|                           | 1 | Pet. | 48 | 48, 96             | Finn Chambers (8<br>mm), applied on the<br>upper back with<br>Scanpor tape  | 584  | 10 | 1.70 | [22] |
| <b>p-Phenylenediamine</b> | 1 | Pet. | 48 | 48, 72, 96,<br>168 | n/a                                                                         | 1993 | 24 | 1.20 | [24] |
|                           | 1 | Pet. | 48 | 72                 | Finn Chambers and<br>TRUE Test applied<br>on the back                       | 3662 | 51 | 1.40 | [32] |
|                           | 1 | Pet. | 48 | 72, 144, 168       | IQ Chambers from<br>Chemotechnique<br>Diagnostics AB<br>applied on the back | 3825 | 77 | 2.00 | [32] |
|                           | 1 | Pet. | 48 | 72, 144, 168       | IQ Chambers from<br>Chemotechnique<br>Diagnostics AB<br>applied on the back | 3112 | 65 | 2.10 | [32] |
|                           | 1 | Pet. | 48 | 48, 72, 96,<br>168 | n/a                                                                         | 1396 | 36 | 2.60 | [35] |
|                           | 1 | Pet. | 48 | 48, 72, 96,<br>168 | n/a                                                                         | 1467 | 40 | 2.70 | [25] |
|                           | 1 | Pet. | 48 | 48, 96             | Finn Chambers<br>secured with Scanpor<br>tape and left on the<br>back       | 3062 | 92 | 3.00 | [38] |
|                           | 1 | Pet. | 48 | 48, 72, 96,<br>168 | n/a                                                                         | 1469 | 44 | 3.00 | [25] |
|                           | 1 | Pet. | 48 | 48, 72, 96,<br>168 | n/a                                                                         | 1397 | 42 | 3.00 | [35] |

|   |      |    |                 |                                                                   |      |     |      |      |
|---|------|----|-----------------|-------------------------------------------------------------------|------|-----|------|------|
| 1 | Pet. | 48 | 120, 168        | IQ Ultra Chambers applied on the patient's back                   | 1608 | 50  | 3.10 | [46] |
| 1 | Pet. | 48 | 72, 96          | n/a                                                               | 968  | 37  | 3.80 | [18] |
| 1 | Pet. | 48 | 48, 72          | Finn Chambers on Sanpor applied on the upper back                 | 373  | 16  | 4.30 | [33] |
| 1 | Pet. | 48 | 48, 72, 96, 168 | Finn Chambers (8 mm), applied on the upper back with Scanpor tape | 3832 | 172 | 4.50 | [19] |
| 1 | Pet. | 48 | 48, 96          | n/a                                                               | 385  | 18  | 4.70 | [16] |
| 1 | Pet. | 48 | 48, 72, 96, 168 | Finn Chambers (8 mm), applied on the upper back with Scanpor tape | 4903 | 235 | 4.80 | [19] |
| 1 | Pet. | 48 | 48, 72, 96, 168 | Finn Chambers (8 mm), applied on the upper back with Scanpor tape | 1320 | 65  | 4.90 | [19] |
| 1 | Pet. | 48 | 48, 72, 96, 168 | Finn Chambers (8 mm), applied on the upper aspect of the back     | 3088 | 160 | 5.20 | [21] |
| 1 | Pet. | 48 | 48, 72          | Finn Chambers on Scanpor tape applied to upper back               | 2758 | 144 | 5.20 | [27] |
| 1 | Pet. | 48 | 72, 168         | Finn Chambers on Scanpor tape                                     | 2598 | 161 | 6.20 | [47] |
| 1 | Pet. | 48 | 96              | Finn Chambers applied to the back of the patients                 | 618  | 43  | 7.00 | [44] |

|                             |     |      |    |                    |                                                                                                 |        |     |       |      |
|-----------------------------|-----|------|----|--------------------|-------------------------------------------------------------------------------------------------|--------|-----|-------|------|
|                             | 1   | Pet. | 48 | 48, 72, 96,<br>168 | Finn Chambers (8<br>mm), applied on the<br>upper aspect of the<br>back                          | 940    | 69  | 7.30  | [4]  |
|                             | 1   | Pet. | 48 | 48, 96             | IQ Chambers                                                                                     | 327    | 25  | 7.60  | [34] |
|                             | 1   | Pet. | 48 | 48, 96             | n/a                                                                                             | 50     | 5   | 10.00 | [16] |
|                             | 1   | Pet. | 48 | 48, 72             | Aluminium patch<br>test chambers<br>mounted on<br>Micropore carried<br>out on the upper<br>back | 200    | 23  | 11.50 | [26] |
|                             | 1   | Pet. | 48 | 72, 96             | n/a                                                                                             | 457    | 92  | 20.10 | [30] |
|                             | 1   | Pet. | 48 | 48, 96             | Aluminium<br>chambers carried out<br>on the upper back                                          | 33     | 7   | 21.20 | [45] |
|                             | 1   | Pet. | 48 | 72, 96             | n/a                                                                                             | 1003   | 244 | 24.30 | [30] |
|                             | 1   | Pet. | 48 | 72, 96             | n/a                                                                                             | 1003   | 244 | 27.00 | [30] |
|                             | 1   | Pet. | 48 | 48, 72, 168        | Finn Chambers on<br>Scanpor tape                                                                | 194    | 68  | 35.10 | [51] |
| <b>Potassium dichromate</b> | 0.5 | Pet. | 48 | 72, 96             | n/a                                                                                             | 10 124 | 367 | 3.60  | [10] |
|                             | 0.5 | Pet. | 48 | 72, 168            | Finn Chambers on<br>Scanpor tape                                                                | 2598   | 119 | 4.60  | [47] |
|                             | 0.5 | Pet. | 48 | 72, 96             | n/a                                                                                             | 2044   | 115 | 5.60  | [37] |
|                             | 0.5 | Pet. | 48 | 48, 72, 96,<br>168 | Finn Chambers (8<br>mm), applied on the<br>upper back with<br>Scanpor tape                      | 3835   | 257 | 6.70  | [19] |
|                             | 0.5 | Pet. | 48 | 48, 96             | IQ Chambers                                                                                     | 327    | 22  | 6.70  | [34] |
|                             | 0.5 | Pet. | 48 | 48, 96             | n/a                                                                                             | 385    | 26  | 6.80  | [16] |
|                             | 0.5 | Pet. | 48 | 48, 72, 96,<br>168 | n/a                                                                                             | 1471   | 43  | 2.90  | [25] |

|                       |     |      |        |                 |                                                                                  |        |     |       |      |
|-----------------------|-----|------|--------|-----------------|----------------------------------------------------------------------------------|--------|-----|-------|------|
|                       | 0.5 | Pet. | 48     | 48, 96          | n/a                                                                              | 50     | 1   | 2.00  | [16] |
|                       | 0.5 | Pet. | 48     | 48, 96          | Finn Chambers on Scanpor tape applied on back                                    | 125    | 3   | 2.40  | [23] |
|                       | 0.5 | Pet. | 48     | 48, 72, 96, 168 | n/a                                                                              | 1398   | 60  | 4.30  | [35] |
|                       | 0.5 | Pet. | 48     | 72, 144, 168    | IQ Chambers from Chemotechnique Diagnostics AB applied on the back               | 3112   | 137 | 4.40  | [32] |
|                       | 0.5 | Pet. | 48     | 48, 72, 96, 168 | n/a                                                                              | 1468   | 64  | 4.40  | [25] |
|                       | 0.5 | Pet. | 48     | 72, 96          | n/a                                                                              | 14 728 | 766 | 5.20  | [10] |
|                       | 0.5 | Pet. | 48     | 48, 72          | Finn Chambers on Sanpor applied on the upper back                                | 373    | 27  | 7.20  | [33] |
|                       | 0.5 | Pet. |        |                 |                                                                                  | 3092   | 229 | 7.40  | [21] |
|                       | 0.5 | Pet. | 48     | 96              | Finn Chambers applied to the back of the patients                                | 618    | 69  | 11.20 | [44] |
|                       | 0.5 | Pet. | 48     | 48, 72          | Finn Chambers on Scanpor tape applied to upper back                              | 3758   | 371 | 13.50 | [27] |
|                       | 0.5 | Pet. | 48     | 48, 72          | Aluminium patch test chambers mounted on Micropore carried out on the upper back | 200    | 41  | 20.50 | [26] |
| <b>Propyl gallate</b> | 1   | Pet. | 24, 48 | 72              | Finn Chambers (8 mm) on Scan-por (19 departments), Leukotest, Hal,               | 3133   | 9   | 0.30  | [17] |

|               |   |      |        |                 |                                                                                                                              |        |     |      |      |
|---------------|---|------|--------|-----------------|------------------------------------------------------------------------------------------------------------------------------|--------|-----|------|------|
| Quaternium 15 | 1 | Pet. | 48     | 48, 72, 96, 168 | Curatest, Haye, Intradex Service BV, Alphen aan den Rijn, Finn Chambers (8 mm), applied on the upper aspect of the back      | 943    | 7   | 0.70 | [4]  |
|               | 1 | Pet. | 48     | 48, 96          | Finn Chambers (8 mm), applied on the upper back with Scanpor tape                                                            | 584    | 4   | 0.70 | [22] |
|               | 1 | Pet. | 48     | 72, 120         | Finn Chambers on Scanpor                                                                                                     | 41     | 1   | 2.40 | [21] |
|               | 1 | Pet. | 48     | 48, 96          | Finn Chambers on Scanpor applied to the upper back                                                                           | 91     | 2   | 2.20 | [43] |
|               | 1 | Pet. | 48     | 48, 96          | Finn Chambers applied on Scanpor tape to the upper back of patients                                                          | 308    | 2   | 0.60 | [6]  |
|               | 1 | Pet. | 48     | 72, 96          | n/a                                                                                                                          | 6981   | 43  | 0.62 | [10] |
|               | 1 | Pet. | 24, 48 | 72              | Finn Chambers (8 mm) on Scan-por (19 departments), Leukotest, Hal, Curatest, Haye, Intradex Service BV, Alphen aan den Rijn, | 11 017 | 68  | 0.62 | [17] |
|               | 1 | Pet. | 48     | 72, 96          | n/a                                                                                                                          | 79 745 | 510 | 0.64 | [28] |
|               | 1 | Pet. | 48     | 48, 96          | Finn Chambers on Scanpor tape                                                                                                | 125    | 1   | 0.80 | [23] |
|               | 1 | Pet. | 48     | 48, 96          | Finn Chambers fixed with Scanpor tape                                                                                        | 7838   | 69  | 0.88 | [35] |

|   |      |    |                    |                                                                             |        |     |      |      |
|---|------|----|--------------------|-----------------------------------------------------------------------------|--------|-----|------|------|
| 1 | Pet. | 48 | 48, 72, 96,<br>168 | n/a                                                                         | 1995   | 18  | 0.90 | [24] |
| 1 | Pet. | 48 | 48, 72             | Finn Chambers<br>applied on the upper<br>back                               | 2295   | 23  | 1.00 | [20] |
| 1 | Pet. | 48 | 48, 72, 96,<br>168 | Finn Chambers<br>(8mm) on Scanpor<br>tape                                   | 18 179 | 174 | 1.00 | [38] |
| 1 | Pet. | 48 | 72                 | Finn Chambers and<br>TRUE Test applied<br>on the back                       | 3662   | 40  | 1.10 | [32] |
| 1 | Pet. | 48 | 48, 96             | Komory IQ<br>Chambers<br>Chemotechnique<br>Diagnostics                      | 405    | 5   | 1.20 | [14] |
| 1 | Pet. | 48 | 72, 144, 168       | IQ Chambers from<br>Chemotechnique<br>Diagnostics AB<br>applied on the back | 3825   | 46  | 1.20 | [32] |
| 1 | Pet. | 48 | 48, 72, 96,<br>168 | n/a                                                                         | 1402   | 17  | 1.20 | [35] |
| 1 | pet  | 48 | 48, 96             | Finn Chambers<br>secured with Scanpor<br>tape and left on the<br>back       | 3062   | 40  | 1.30 | [38] |
| 1 | Pet. | 48 | 72, 144, 168       | IQ Chambers from<br>Chemotechnique<br>Diagnostics AB<br>applied on the back | 3112   | 44  | 1.40 | [32] |
| 1 | Pet. | 48 | 48, 72, 96,<br>168 | n/a                                                                         | 1471   | 20  | 1.40 | [25] |

|   |      |    |                 |                                                                                  |      |     |      |      |
|---|------|----|-----------------|----------------------------------------------------------------------------------|------|-----|------|------|
| 1 | Pet. | 48 | 120, 168        | IQ Ultra Chambers applied on the patient's back                                  | 1608 | 26  | 1.60 | [46] |
| 1 | Pet. | 48 | 72, 96          | n/a                                                                              | 1735 | 28  | 1.60 | [37] |
| 1 | Pet. | 48 | 72, 168         | Finn Chambers on Scanpor tape                                                    | 2598 | 44  | 1.69 | [47] |
| 1 | Pet. | 48 | 48, 96          | IQ Chambers                                                                      | 327  | 6   | 1.80 | [34] |
| 1 | Pet. | 48 | 48, 96          | Finn Chambers (8 mm) or IQ Chambers                                              | 9361 | 178 | 1.90 | [41] |
| 1 | Pet. | 48 | 48, 72          | Finn Chambers on Sanpor applied on the upper back                                | 373  | 7   | 1.90 | [33] |
| 1 | Pet. | 48 | 72, 96          | Curatest Lohman&Rauscher, Rengsdorf Germany                                      | 1927 | 37  | 1.90 | [15] |
| 1 | Pet. | 48 | 48, 72, 96, 168 | n/a                                                                              | 1398 | 26  | 1.90 | [35] |
| 1 | Pet. | 48 | 48, 72, 96, 168 | n/a                                                                              | 1468 | 29  | 2.00 | [25] |
| 1 | Pet. | 48 | 48, 96          | Finn Chambers on Scanpor applied to the upper back                               | 91   | 2   | 2.20 | [43] |
| 1 | Pet. | 48 | 48, 72          | Aluminium patch test chambers mounted on Micropore carried out on the upper back | 200  | 5   | 2.50 | [26] |
| 1 | Pet. | 48 | 96              | Finn Chambers applied to the back of the patients                                | 618  | 16  | 2.60 | [44] |
| 1 | Pet. | 48 | 48, 96          | Finn Chambers applied with Scanpor                                               | 2298 | 59  | 2.60 | [40] |

|   |      |    |                 |                                                                   |                        |     |      |      |  |
|---|------|----|-----------------|-------------------------------------------------------------------|------------------------|-----|------|------|--|
|   |      |    |                 |                                                                   | tape to the upper back |     |      |      |  |
| 1 | Pet. | 48 | 48, 96          | Finn Chambers on Scanpor tape to the upper back                   | 6845                   | 198 | 2.90 | [29] |  |
| 1 | Pet. | 48 | 48, 96          | Finn Chambers (8 mm), applied on the upper back with Scanpor tape | 584                    | 19  | 3.30 | [22] |  |
| 2 | Pet. | 48 | 48, 72, 96, 168 | Finn Chambers (8 mm), applied on the upper back with Scanpor tape | 408                    | 21  | 5.15 | [19] |  |
| 1 | Pet. | 48 | 72, 120         | Finn Chambers on Scanpor                                          | 34                     | 2   | 5.90 | [21] |  |
| 1 | Pet. | 48 | 48, 72, 96, 168 | Finn Chambers on Scanpor tape applied to a patient's upper back   | 942                    | 71  | 7.50 | [4]  |  |
| 1 | Pet. | 48 | 48, 72, 96, 168 | Finn Chambers (8 mm), applied on the upper back with Scanpor tape | 913                    | 71  | 7.78 | [19] |  |
| 1 | Pet. | 48 | 48, 72, 96, 168 | Finn Chambers (8 mm), applied on the upper back with Scanpor tape | 3841                   | 311 | 8.10 | [19] |  |
| 1 | Pet. | 48 | 48, 72, 96, 168 | Finn Chambers (8 mm), applied on the upper aspect of the back     | 3091                   | 275 | 8.90 | [21] |  |
| 2 | Pet. | 48 | 48, 72, 96, 168 | Finn Chambers (8 mm), applied on the                              | 4910                   | 457 | 9.30 | [19] |  |

|               |   |      |    |                    |                                                                             |      |     |       |      |
|---------------|---|------|----|--------------------|-----------------------------------------------------------------------------|------|-----|-------|------|
| Quinoline mix |   |      |    |                    | upper back with<br>Scanpor tape                                             |      |     |       |      |
|               | 2 | Pet. | 48 | 48, 72, 96,<br>168 | Finn Chambers (8<br>mm), applied on the<br>upper aspect of the<br>back      | 4446 | 458 | 10.30 | [21] |
|               | 1 | Pet. | 48 | 48, 96             | Finn Chambers on<br>Scanpor tape applied<br>to the areas of the<br>back     | 342  | 38  | 11.11 | [42] |
|               | 6 | Pet. | 48 | 72, 144, 168       | IQ Chambers from<br>Chemotechnique<br>Diagnostics AB<br>applied on the back | 3112 | 6   | 0.20  | [32] |
|               | 6 | Pet. | 48 | 72, 168            | Finn Chambers on<br>Scanpor tape                                            | 2598 | 10  | 0.40  | [47] |
|               | 6 | Pet. | 48 | 72, 144, 168       | IQ Chambers from<br>Chemotechnique<br>Diagnostics AB<br>applied on the back | 3825 | 19  | 0.50  | [32] |
|               | 6 | Pet. | 48 | 48, 72, 96,<br>168 | n/a                                                                         | 967  | 5   | 0.50  | [35] |
|               | 6 | Pet. | 48 | 48, 72             | Finn Chambers on<br>Sanpor applied on<br>the upper back                     | 373  | 4   | 1.10  | [33] |
|               | 6 | Pet. | 48 | 48, 96             | Finn Chambers on<br>Scanpor tape applied<br>on back                         | 125  | 2   | 1.60  | [23] |
|               | 6 | Pet. | 48 | 48, 72, 96,<br>168 | n/a                                                                         | 703  | 13  | 1.80  | [25] |
|               | 6 | Pet. | 48 | 48, 72, 96,<br>168 | n/a                                                                         | 789  | 18  | 2.30  | [25] |

|                       |    |      |    |                 |                                                                                  |        |     |      |      |
|-----------------------|----|------|----|-----------------|----------------------------------------------------------------------------------|--------|-----|------|------|
|                       | 6  | Pet. | 48 | 48, 72          | Aluminium patch test chambers mounted on Micropore carried out on the upper back | 200    | 5   | 2.50 | [26] |
| <b>Sandalwood oil</b> | 2  | Pet. | 48 | 48, 96          | Finn Chambers applied on Scanpor tape to the upper back of patients              | 308    | 2   | 0.60 | [6]  |
|                       | 2  | Pet. | 48 | 48, 72, 96, 168 | Finn Chambers (8 mm), applied on the upper aspect of the back                    | 870    | 17  | 2.00 | [4]  |
|                       | 2  | Pet. | 48 | 48, 96, 168     | Finn Chambers fixed with Scanpor                                                 | 86     | 2   | 2.30 | [31] |
|                       | 2  | Pet. | 48 | n/a             | n/a                                                                              | 59     | 2   | 3.40 | [9]  |
|                       | 10 | Pet. | 48 | 48, 120         | Finn Chambers (8 mm), applied on the upper back with Scanpor tape                | 167    | 11  | 6.60 | [13] |
| <b>Sorbic acid</b>    | 2  | Pet. | 48 | 72, 96          | Curatest Lohman&Rauscher, Rengsdorf Germany                                      | 1927   | 4   | 0.20 | [15] |
|                       | 2  | Pet. | 48 | 48, 72, 96, 168 | Finn Chambers (8 mm), applied on the upper back with Scanpor tape                | 610    | 2   | 0.30 | [19] |
|                       | 2  | Pet. | 48 | 48, 72, 96, 168 | Finn Chambers (8 mm), applied on the upper aspect of the back                    | 410    | 2   | 0.50 | [21] |
|                       | 2  | Pet. | 48 | 72, 96          | n/a                                                                              | 77 708 | 519 | 0.70 | [28] |

|                              |    |      |        |                 |                                                                                                                              |        |    |      |      |
|------------------------------|----|------|--------|-----------------|------------------------------------------------------------------------------------------------------------------------------|--------|----|------|------|
|                              | 2  | Pet. | 48     | 72, 96          | n/a                                                                                                                          | 6978   | 47 | 0.70 | [10] |
|                              | 2  | Pet. | 24, 48 | 72              | Finn Chambers (8 mm) on Scan-por (19 departments), Leukotest, Hal, Curatest, Haye, Intradex Service BV, Alphen aan den Rijn, | 11 437 | 85 | 0.70 | [17] |
|                              | 2  | Pet. | 48     | 48, 72, 96, 168 | Finn Chambers (8 mm), applied on the upper aspect of the back                                                                | 3084   | 25 | 0.80 | [21] |
|                              | 2  | Pet. | 48     | 48, 72, 96, 168 | Finn Chambers on Scanpor tape applied to a patient's upper back                                                              | 871    | 8  | 0.90 | [4]  |
|                              | 2  | Pet. | 48     | 48, 96          | Finn Chambers (8 mm), applied on the upper back with Scanpor tape                                                            | 584    | 12 | 2.10 | [22] |
|                              | 2  | Pet. | 48     | 48, 96          | Finn Chambers on Scanpor applied to the upper back                                                                           | 91     | 4  | 4.40 | [43] |
|                              | 2  | Pet. | 48     | 48, 96          | Aluminium chambers carried out on the upper back                                                                             | 33     | 2  | 6.10 | [45] |
| <b>Sorbitan sesquioleate</b> | 20 | Pet. | 48     | 48, 72, 96, 168 | Finn Chambers (8 mm), applied on the back with Scanpor tape                                                                  | 1502   | 1  | 0.10 | [2]  |
|                              | 20 | Pet. | 48     | 48, 120         | Finn Chambers (8 mm), applied on the                                                                                         | 167    | 1  | 0.60 | [13] |

|            |     |      |    |                    |                                                                                                                 |      |     |       |      |
|------------|-----|------|----|--------------------|-----------------------------------------------------------------------------------------------------------------|------|-----|-------|------|
| Thimerosal | 20  | Pet. | 48 | 48, 96             | upper back with<br>Scanpor tape<br>Finn Chambers<br>applied on Scanpor<br>tape to the upper<br>back of patients | 308  | 2   | 0.60  | [6]  |
|            | 20  | Pet. | 48 | 48, 72, 96,<br>168 | Finn Chambers (8<br>mm), applied on the<br>upper aspect of the<br>back                                          | 870  | 8   | 0.90  | [4]  |
|            | 20  | Pet. | 48 | 48, 96             | Aluminium<br>chambers carried out<br>on the upper back                                                          | 33   | 1   | 3.00  | [45] |
|            | 0.1 | Pet  | 48 | 48, 96             | Finn Chambers<br>applied on Scanpor<br>tape to the upper<br>back of patients                                    | 308  | 5   | 1.60  | [6]  |
|            | 0.1 | Pet  | 48 | 48, 72, 96,<br>168 | Finn Chambers (8<br>mm), applied on the<br>upper back with<br>Scanpor tape                                      | 1747 | 183 | 10.50 | [19] |
|            | 0.1 | Pet  | 48 | 72, 96             | Curatest<br>Lohman&Rauscher,<br>Rengsdorf Germany                                                               | 1927 | 218 | 11.30 | [15] |
|            | 0.1 | Pet  | 48 | 48, 72             | Finn Chambers on<br>Scanpor tape applied<br>to upper back                                                       | 2758 | 320 | 11.60 | [27] |
|            | 0.1 | Pet  | 48 | 48, 72, 96,<br>168 | Finn Chambers (8<br>mm), applied on the<br>upper aspect of the<br>back                                          | 942  | 128 | 13.60 | [4]  |
|            |     |      |    |                    |                                                                                                                 |      |     |       |      |

|                    |     |      |    |              |                                                                    |        |     |       |      |
|--------------------|-----|------|----|--------------|--------------------------------------------------------------------|--------|-----|-------|------|
|                    | 0.1 | Pet  | 48 | 96           | Finn Chambers applied to the back of the patients                  | 618    | 99  | 16.00 | [44] |
|                    | 0.1 | Pet  | 48 | 48, 96       | Finn Chambers on Scanpor tape applied on back                      | 125    | 23  | 18.40 | [23] |
|                    | 0.1 | Pet  | 48 | 72, 96       | n/a                                                                | 235    | 48  | 20.40 | [37] |
|                    | 0.1 | Pet  | 48 | 48, 96       | Aluminium chambers carried out on the upper back                   | 33     | 1   | 3.00  | [45] |
|                    | 0.1 | Pet  | 48 | 48, 96       | n/a                                                                | 50     | 2   | 4.00  | [16] |
|                    | 0.1 | Pet  | 48 | 48, 72       | Finn Chambers applied on the upper back                            | 2295   | 96  | 4.20  | [20] |
|                    | 0.1 | Pet  | 48 | 48, 96       | n/a                                                                | 385    | 21  | 5.50  | [16] |
|                    | 0.1 | Pet  | 48 | 48, 72       | Finn Chambers on Sanpor applied on the upper back                  | 373    | 28  | 7.50  | [33] |
|                    | 0.1 | Pet  | 48 | 48, 96       | Finn Chambers (8 mm), applied on the upper back with Scanpor tape  | 584    | 58  | 9.90  | [22] |
| <b>Thiuram mix</b> | 1   | Pet. | 48 | 72, 144, 168 | IQ Chambers from Chemotechnique Diagnostics AB applied on the back | 3112   | 50  | 1.60  | [32] |
|                    | 1   | Pet. | 48 | 48, 72       | Finn Chambers on Sanpor applied on the upper back                  | 373    | 10  | 2.70  | [33] |
|                    | 1   | Pet. | 48 | 72, 96       | n/a                                                                | 2026   | 157 | 7.70  | [37] |
|                    | 1   | Pet. | 48 | 72, 96       | n/a                                                                | 1905   | 37  | 1.90  | [30] |
|                    | 1   | Pet. | 48 | 72, 96       | n/a                                                                | 14 728 | 280 | 1.90  | [10] |

|   |      |    |                 |                                                                   |        |     |      |      |
|---|------|----|-----------------|-------------------------------------------------------------------|--------|-----|------|------|
| 1 | Pet. | 48 | 72, 120         | Finn Chambers on Scanpor                                          | 34     | 1   | 2.90 | [21] |
| 1 | Pet. | 48 | 72, 96          | n/a                                                               | 698    | 20  | 2.90 | [30] |
| 1 | Pet. | 48 | 48, 96          | Finn Chambers on Scanpor tape applied on back                     | 125    | 0   | 0.00 | [23] |
| 1 | Pet. | 48 | 72, 168         | Finn Chambers on Scanpor tape                                     | 2598   | 5   | 0.20 | [47] |
| 1 | Pet. | 48 | 48, 96          | IQ Chambers                                                       | 327    | 1   | 0.30 | [34] |
| 1 | Pet. | 48 | 72, 96          | n/a                                                               | 10 124 | 127 | 1.20 | [10] |
| 1 | Pet. | 48 | 72              | Finn Chambers and TRUE Test applied on the back                   | 3662   | 73  | 2.00 | [32] |
| 1 | Pet. | 48 | 48, 72, 96, 168 | n/a                                                               | 1468   | 36  | 2.50 | [25] |
| 1 | Pet. | 48 | 48, 72, 96, 168 | n/a                                                               | 1471   | 37  | 2.50 | [25] |
| 1 | Pet. | 48 | 48, 72, 96, 168 | Finn Chambers (8 mm), applied on the upper aspect of the back     | 3094   | 96  | 3.10 | [21] |
| 1 | Pet. | 48 | 48, 72, 96, 168 | Finn Chambers (8 mm), applied on the upper back with Scanpor tape | 3838   | 127 | 3.30 | [19] |
| 1 | Pet. | 48 | 48, 72, 96, 168 | n/a                                                               | 1398   | 48  | 3.40 | [35] |
| 1 | Pet. | 48 | 48, 96          | n/a                                                               | 385    | 13  | 3.40 | [16] |
| 1 | Pet. | 48 | 48, 72          | Aluminium patch test chambers mounted on Micropore carried        | 200    | 9   | 4.50 | [26] |

|                                    |    |      |    |                    |                                                                            |      |    |       |      |
|------------------------------------|----|------|----|--------------------|----------------------------------------------------------------------------|------|----|-------|------|
|                                    |    |      |    |                    | out on the upper<br>back                                                   |      |    |       |      |
|                                    | 1  | Pet. | 48 | 96                 | Finn Chambers<br>applied to the back of<br>the patients                    | 618  | 38 | 6.20  | [44] |
|                                    | 1  | Pet. | 48 | 48, 96             | Finn Chambers on<br>Scanpor applied to<br>the upper back                   | 91   | 10 | 11.00 | [43] |
| <b>Titanium Dioxide</b>            | 1  | Pet. | 48 | 48, 72, 96,<br>168 | Finn Chambers (8<br>mm), applied on the<br>upper aspect of the<br>back     | 921  | 8  | 0.90  | [4]  |
| <b>Toluene-2,5-diamine sulfate</b> | 1  | Pet. | 48 | 48, 72, 168        | Finn Chambers on<br>Scanpor tape                                           | 198  | 23 | 11.60 | [51] |
| <b>Triethanolamine</b>             | 2  | Pet. | 48 | 48, 72, 96,<br>168 | Finn Chambers (8<br>mm), applied on the<br>upper aspect of the<br>back     | 944  | 6  | 0.60  | [4]  |
|                                    | 2  | Pet. | 48 | 48, 72, 96,<br>168 | Finn Chambers (8<br>mm), applied on the<br>upper back with<br>Scanpor tape | 3845 | 31 | 0.80  | [19] |
|                                    | 2  | Pet. | 48 | 48, 96             | Finn Chambers (8<br>mm), applied on the<br>upper back with<br>Scanpor tape | 584  | 21 | 3.60  | [22] |
| <b>Wool alcohols</b>               | 30 | Pet. | 48 | 48, 72, 96,<br>168 | Finn Chambers (8<br>mm), applied on the<br>upper aspect of the<br>back     | 942  | 17 | 1.80  | [4]  |
|                                    | 30 | Pet. | 48 | 48, 72, 96,<br>168 | Finn Chambers (8<br>mm), applied on the                                    | 3842 | 73 | 1.90  | [19] |

|                        |    |      |    |                    |                                                                            |      |    |       |      |
|------------------------|----|------|----|--------------------|----------------------------------------------------------------------------|------|----|-------|------|
|                        |    |      |    |                    | upper back with<br>Scanpor tape                                            |      |    |       |      |
|                        | 30 | Pet. | 48 | 48, 72             | Finn Chambers on<br>Sanpor applied on<br>the upper back                    | 373  | 9  | 2.40  | [33] |
|                        | 30 | Pet. | 48 | 48, 72, 96,<br>168 | Finn Chambers (8<br>mm), applied on the<br>upper aspect of the<br>back     | 3032 | 73 | 2.40  | [21] |
|                        | 30 | Pet. | 48 | 48, 96             | Finn Chambers on<br>Scanpor applied to<br>the upper back                   | 91   | 7  | 7.70  | [43] |
| <b>Ylang Ylang oil</b> | 2  | Pet. | 48 | 48, 72, 96,<br>168 | Finn Chambers (8<br>mm), applied on the<br>upper aspect of the<br>back     | 870  | 8  | 0.90  | [4]  |
|                        | 2  | Pet. | 48 | 48, 72, 96,<br>168 | Finn Chambers (8<br>mm), applied on the<br>upper back with<br>Scanpor tape | 4893 | 54 | 1.10  | [19] |
|                        | 2  | Pet. | 48 | 120, 168           | IQ Ultra Chambers<br>applied on the<br>patient's back                      | 1608 | 17 | 1.10  | [46] |
|                        | 2  | Pet. | 48 | 72, 96             | n/a                                                                        | 917  | 23 | 2.50  | [37] |
|                        | 2  | Pet. | 48 | 48, 96, 168        | Finn Chambers fixed<br>with Scanpor                                        | 86   | 12 | 13.90 | [31] |
|                        | 10 | Pet. | 48 | 48, 120            | Finn Chambers (8<br>mm), applied on the<br>upper back with<br>Scanpor tape | 167  | 29 | 17.40 | [13] |
|                        | 2  | Pet. | 48 | n/a                | n/a                                                                        | 59   | 16 | 27.10 | [9]  |
|                        |    |      |    |                    |                                                                            |      |    |       |      |

**Table S2. Summary of patch test studies in general populations.**

| Name of ingredient           | Concentration (%) | Base | Occlusion (h) | Time to evaluate reactions | Application system                  | N    | n  | n (%) | Source |
|------------------------------|-------------------|------|---------------|----------------------------|-------------------------------------|------|----|-------|--------|
| <b>Ammylcinnamyl alcohol</b> | 2                 | Pet. | n/a           | n/a                        | TRUE test and Finn Chambers         | 3117 | 3  | 0.10  | [5]    |
| <b>Balsam of Peru</b>        | 25                | Pet. | 48            | 48                         | TRUE test                           | 3460 | 3  | 0.10  | [52]   |
|                              | 25                | Pet. | 48            | 72                         | TRUE test applied to the upper back | 1236 | 5  | 0.40  | [53]   |
|                              | 25                | Pet. | n/a           | n/a                        | TRUE test and Finn Chambers         | 3117 | 23 | 0.70  | [5]    |
|                              | 25                | Pet. | 48            | 48, 72, 96, 168            | n/a                                 | 399  | 3  | 0.80  | [24]   |
|                              | 25                | Pet. | 48            | 72                         | TRUE test applied to the upper back | 531  | 6  | 1.10  | [53]   |
|                              | 25                | Pet. | 48            | 48                         | TRUE test applied to the upper back | 567  | 6  | 1.10  | [54]   |

|                          |     |      |     |                 |                                         |      |    |      |      |
|--------------------------|-----|------|-----|-----------------|-----------------------------------------|------|----|------|------|
|                          | 25  | Pet. | 48  | 48              | TRUE test                               | 543  | 6  | 1.10 | [52] |
|                          | 25  | Pet. | 48  | 48              | TRUE test applied to the upper back     | 469  | 6  | 1.30 | [55] |
|                          | 25  | Pet. | 48  | 48, 72, 96, 168 | n/a                                     | 1471 | 35 | 2.40 | [25] |
|                          | 25  | Pet. | 48  | 48, 72, 96, 168 | n/a                                     | 1400 | 43 | 3.10 | [35] |
|                          | 25  | Pet. | 48  | 72              | Finn Chambers applied on the upper back | 1141 | 43 | 3.80 | [56] |
| <b>Benzocaine</b>        | 5   | Pet. | 48  | 48, 72, 96, 168 | n/a                                     | 698  | 1  | 0.10 | [35] |
|                          | 5   | Pet. | 48  | 72              | Finn Chambers applied on the upper back | 1141 | 11 | 1.00 | [56] |
|                          | 5   | Pet. | 48  | 48, 72, 96, 168 | n/a                                     | 318  | 4  | 1.30 | [24] |
| <b>Benzyl alcohol</b>    | 1   | Pet. | 48  | 48, 96          | TRUE test applied to the upper back     | 201  | 0  | 0.00 | [57] |
| <b>Benzyl salicylate</b> | 1   | Pet. | 48  | 48, 96          | TRUE test applied to the upper back     | 201  | 1  | 0.50 | [57] |
| <b>Black rubber mix</b>  | 0.6 | Pet. | 48  | 48              | TRUE test                               | 3460 | 4  | 0.10 | [52] |
|                          | 0.6 | Pet. | 48  | 72              | TRUE test applied to the upper back     | 1236 | 1  | 0.10 | [53] |
|                          | 0.6 | Pet. | 48  | 48              | TRUE test applied to the upper back     | 567  | 1  | 0.20 | [54] |
|                          | 0.6 | Pet. | 48  | 48              | TRUE test                               | 567  | 1  | 0.20 | [52] |
|                          | 0.6 | Pet. | n/a | n/a             | TRUE test and Finn Chambers             | 3117 | 11 | 0.40 | [5]  |
|                          | 0.6 | Pet. | 48  | 48, 96          | IQ Chambers                             | 205  | 1  | 0.50 | [34] |
| <b>Bronopol</b>          | 0.5 | Pet. | 48  | 48, 96          | IQ Chambers                             | 205  | 0  | 0.00 | [34] |
|                          | 0.5 | Pet. | 48  | 48, 96          | TRUE test applied to the upper back     | 201  | 0  | 0.00 | [57] |
|                          | 0.5 | Pet. | 48  | 48, 72, 96, 168 | n/a                                     | 1389 | 4  | 0.30 | [35] |

|                                  |   |      |     |        |                                         |      |    |      |      |
|----------------------------------|---|------|-----|--------|-----------------------------------------|------|----|------|------|
| <b>Butylhydroxyanisole (BHA)</b> | 2 | Pet. | 48  | 48, 96 | TRUE test applied to the upper back     | 201  | 2  | 2.20 | [57] |
| <b>Caine mix</b>                 | 7 | Pet. | 48  | 48     | TRUE test applied to the upper back     | 567  | 0  | 0.00 | [54] |
|                                  | 7 | Pet. | 48  | 48     | TRUE test applied to the upper back     | 290  | 0  | 0.00 | [55] |
|                                  | 7 | Pet. | 48  | 48     | TRUE test                               | 567  | 0  | 0.00 | [52] |
|                                  | 7 | Pet. | 48  | 48     | TRUE test                               | 3460 | 2  | 0.10 | [52] |
|                                  | 7 | Pet. | 48  | 72     | TRUE test applied to the upper back     | 1236 | 1  | 0.10 | [53] |
|                                  | 7 | Pet. | 48  | 48     | TRUE test applied to the upper back     | 469  | 1  | 0.20 | [55] |
|                                  | 7 | Pet. | n/a | n/a    | TRUE test and Finn Chambers             | 3119 | 13 | 0.40 | [5]  |
|                                  | 7 | Pet. | 48  | 72     | TRUE test applied to the upper back     | 531  | 2  | 0.40 | [53] |
|                                  | 3 | Pet. | 48  | 48     | TRUE test                               | 567  | 4  | 0.20 | [52] |
| <b>Carba mix</b>                 | 3 | Pet. | 48  | 48     | TRUE test applied to the upper back     | 567  | 2  | 0.40 | [54] |
|                                  | 3 | Pet. | n/a | n/a    | TRUE test and Finn Chambers             | 3117 | 17 | 0.50 | [5]  |
|                                  | 3 | Pet. | 48  | 72     | TRUE test applied to the upper back     | 1236 | 8  | 0.60 | [53] |
|                                  | 3 | Pet. | 48  | 48, 96 | IQ Chambers                             | 205  | 5  | 2.40 | [34] |
|                                  | 1 | Pet. | n/a | n/a    | TRUE test and Finn Chambers             | 3117 | 26 | 0.80 | [5]  |
| <b>Cinnamal</b>                  | 1 | Pet. | n/a | n/a    | TRUE test and Finn Chambers             | 3117 | 10 | 0.30 | [5]  |
| <b>Cinnamic alcohol</b>          | 1 | Pet. | n/a | n/a    | TRUE test and Finn Chambers             | 3117 | 6  | 0.20 | [5]  |
| <b>Citral</b>                    | 2 | Pet. | n/a | n/a    | TRUE test and Finn Chambers             | 3117 | 6  | 0.20 | [5]  |
| <b>Cobalt (di)chloride</b>       | 1 | Pet. | 48  | 48     | TRUE test applied to the upper back     | 567  | 6  | 1.10 | [54] |
|                                  | 1 | Pet. | 48  | 72     | Finn Chambers applied on the upper back | 1141 | 27 | 2.40 | [56] |

|                                |    |      |     |                    |                                        |      |    |      |      |
|--------------------------------|----|------|-----|--------------------|----------------------------------------|------|----|------|------|
|                                | 1  | Pet. | 48  | 48, 72, 96,<br>168 | n/a                                    | 399  | 18 | 4.50 | [24] |
|                                | 1  | Pet. | 48  | 48, 96             | IQ Chambers                            | 205  | 10 | 4.90 | [34] |
|                                | 1  | Pet. | 48  | 48, 72, 96,<br>168 | n/a                                    | 1400 | 74 | 5.30 | [35] |
|                                | 1  | Pet. | 48  | 48                 | TRUE test applied to<br>the upper back | 469  | 4  | 0.80 | [55] |
|                                | 1  | Pet. | 48  | 48                 | TRUE test applied to<br>the upper back | 290  | 3  | 1.00 | [55] |
|                                | 1  | Pet. | 48  | 48                 | TRUE test                              | 567  | 6  | 1.10 | [52] |
|                                | 1  | Pet. | 48  | 72                 | TRUE test applied to<br>the upper back | 531  | 9  | 1.70 | [53] |
|                                | 1  | Pet. | n/a | n/a                | TRUE test and Finn<br>Chambers         | 3117 | 68 | 2.20 | [5]  |
|                                | 1  | Pet. | 48  | 72                 | TRUE test applied to<br>the upper back | 1236 | 35 | 2.80 | [53] |
| <b>Cocamidopropyl betaine</b>  | 1  | Aq.  | 48  | 48, 96             | TRUE test applied to<br>the upper back | 201  | 4  | 2.00 | [57] |
| <b>Colophonium</b>             | 20 | Pet. | 48  | 48                 | TRUE test applied to<br>the upper back | 290  | 0  | 0.00 | [55] |
|                                | 20 | Pet. | 48  | 48                 | TRUE test                              | 3460 | 21 | 0.60 | [52] |
|                                | 20 | Pet. | 48  | 48                 | TRUE test applied to<br>the upper back | 567  | 4  | 0.70 | [54] |
|                                | 20 | Pet. | 48  | 48                 | TRUE test                              | 543  | 4  | 0.70 | [52] |
| <b>Colophonium – continued</b> | 20 | Pet. | 48  | 48                 | TRUE test applied to<br>the upper back | 469  | 4  | 0.80 | [55] |
|                                | 20 | Pet. | n/a | n/a                | TRUE test and Finn<br>Chambers         | 3117 | 30 | 1.00 | [5]  |
|                                | 20 | Pet. | 48  | 72                 | TRUE test applied to<br>the upper back | 531  | 6  | 1.10 | [53] |
|                                | 20 | Pet. | 48  | 72                 | TRUE test applied to<br>the upper back | 1236 | 15 | 1.20 | [53] |
|                                | 20 | Pet. | 48  | 48, 96             | IQ Chambers                            | 205  | 3  | 1.50 | [34] |

|                          |    |      |     |                    |                                                                   |        |     |      |      |
|--------------------------|----|------|-----|--------------------|-------------------------------------------------------------------|--------|-----|------|------|
|                          | 20 | Pet. | 48  | 48, 72, 96,<br>168 | n/a                                                               |        |     | 1.50 | [24] |
|                          | 20 | Pet. | 48  | 72                 | Finn Chambers applied<br>on the upper back                        | 1141   | 18  | 1.60 | [56] |
|                          | 20 | Pet. | 48  | 48                 | Finn Chambers using<br>Scanpor adhesive tape<br>on the upper back | 1178   | 24  | 2.00 | [58] |
|                          | 20 | Pet. | 48  | 72, 96             | n/a                                                               | 14 728 | 574 | 3.90 | [10] |
|                          | 20 | Pet. | 48  | 48, 72, 96,<br>168 | n/a                                                               | 1470   | 64  | 4.40 | [25] |
|                          | 20 | Pet. | 48  | 48, 72, 96,<br>168 | n/a                                                               | 1400   | 64  | 4.60 | [35] |
| <b>Diazolidynyl Urea</b> | 2  | Pet. | n/a | n/a                | TRUE test and Finn<br>Chambers                                    | 3117   | 6   | 0.20 | [5]  |
|                          | 2  | Pet. | 48  | 48, 96             | TRUE test applied to<br>the upper back                            | 201    | 1   | 0.5  | [57] |
|                          | 2  | Pet. | 48  | 48, 72, 96,<br>168 | n/a                                                               | 1398   | 15  | 1.10 | [35] |
| <b>DMDM Hydantoin</b>    | 2  | Aq.  | 48  | 48, 96             | TRUE test applied to<br>the upper back                            | 201    | 0   | 0.00 | [57] |
| <b>Epoxy resin</b>       | 1  | Pet. | 48  | 48                 | TRUE test applied to<br>the upper back                            | 290    | 0   | 0.00 | [55] |
|                          | 1  | Pet. | 48  | 48                 | TRUE test applied to<br>the upper back                            | 469    | 1   | 0.20 | [55] |
|                          | 1  | Pet. | 48  | 48                 | TRUE test                                                         | 3460   | 18  | 0.50 | [52] |
|                          | 1  | Pet. | 48  | 48                 | TRUE test applied to<br>the upper back                            | 567    | 3   | 0.50 | [54] |
|                          | 1  | Pet. | 48  | 48, 96             | IQ Chambers                                                       | 205    | 1   | 0.50 | [34] |
|                          | 1  | Pet. | 48  | 72                 | Finn Chambers                                                     | 1141   | 7   | 0.60 | [56] |

|                                     |   |      |     |                 |                                     |      |    |      |      |
|-------------------------------------|---|------|-----|-----------------|-------------------------------------|------|----|------|------|
|                                     | 1 | Pet. | 48  | 72              | TRUE test applied to the upper back | 1236 | 7  | 0.60 | [53] |
|                                     | 1 | Pet. | 48  | 48              | TRUE test                           | 567  | 3  | 0.60 | [52] |
|                                     | 1 | Pet. | 48  | 72              | TRUE test applied to the upper back | 531  | 4  | 0.80 | [53] |
|                                     | 1 | Pet. | n/a | n/a             | TRUE Test and Finn Chambers         | 3117 | 28 | 0.90 | [5]  |
|                                     | 1 | Pet. | 48  | 48, 72, 96, 168 | n/a                                 | 1401 | 19 | 1.40 | [35] |
| <b>Ethylenediamine (dichloride)</b> | 1 | Pet. | 48  | 48              | TRUE test applied to the upper back | 567  | 1  | 0.20 | [54] |
|                                     | 1 | Pet. | 48  | 72              | TRUE test applied to the upper back | 1236 | 1  | 0.10 | [53] |
|                                     | 1 | Pet. | 48  | 48              | TRUE test                           | 3460 | 8  | 0.20 | [52] |
|                                     | 1 | Pet. | 48  | 48              | TRUE test                           | 567  | 1  | 0.20 | [52] |
|                                     | 1 | Pet. | 48  | 48              | TRUE test applied to the upper back | 290  | 1  | 0.30 | [55] |
|                                     | 1 | Pet. | n/a | n/a             | TRUE Test and Finn Chambers         | 3117 | 11 | 0.40 | [5]  |
|                                     | 1 | Pet. | 48  | 48              | TRUE test applied to the upper back | 469  | 5  | 1.10 | [55] |
|                                     | 1 | Pet. | 48  | 48, 96          | IQ Chambers                         | 205  | 3  | 1.50 | [34] |
| <b>Evernia Prunastri Extract</b>    | 2 | Pet. | n/a | n/a             | TRUE Test and Finn Chambers         | 3117 | 16 | 0.50 | [5]  |
|                                     | 2 | Pet. | n/a | n/a             | TRUE Test and Finn Chambers         | 3117 | 31 | 1.00 | [5]  |
| <b>Farnesol</b>                     | 5 | Pet. | n/a | n/a             | TRUE test and Finn Chambers         | 3117 | 14 | 0.40 | [5]  |
| <b>Formaldehyde</b>                 | 1 | Pet. | 48  | 48              | TRUE test                           | 3460 | 7  | 0.20 | [52] |
|                                     | 1 | Pet. | n/a | n/a             | TRUE test and Finn Chambers         | 3117 | 11 | 0.35 | [5]  |
|                                     | 1 | Pet. | 48  | 72              | Finn Chambers                       | 1141 | 7  | 0.61 | [56] |

|                 |   |      |     |                 |                                                             |      |    |      |      |
|-----------------|---|------|-----|-----------------|-------------------------------------------------------------|------|----|------|------|
| Fragrance Mix I | 1 | Pet. | 48  | 48              | TRUE test applied to the upper back                         | 469  | 3  | 0.64 | [55] |
|                 | 1 | Pet. | 48  | 48              | Finn Chambers using Scanpor adhesive tape on the upper back | 2545 | 19 | 0.75 | [58] |
|                 | 1 | Pet. | 48  | 72              | TRUE test applied to the upper back                         | 1236 | 11 | 0.90 | [53] |
|                 | 1 | Aq.  | 48  | 48, 72, 96, 168 | n/a                                                         | 399  | 6  | 1.50 | [24] |
|                 | 1 | Aq.  | 48  | 48, 72, 96, 168 | n/a                                                         | 1397 | 27 | 1.90 | [35] |
|                 | 1 | Aq.  | 48  | 48, 72, 96, 168 | n/a                                                         | 1395 | 35 | 2.50 | [35] |
|                 | 1 | Aq.  | 48  | 48, 72, 96, 168 | n/a                                                         | 1471 | 43 | 3.00 | [25] |
|                 | 8 | Pet. | 48  | 48              | TRUE test applied to the upper back                         | 290  | 1  | 0.30 | [55] |
|                 | 8 | Pet. | 48  | 48              | TRUE test applied to the upper back                         | 567  | 6  | 1.10 | [54] |
|                 | 8 | Pet. | 48  | 48              | TRUE test                                                   | 543  | 6  | 1.10 | [52] |
|                 | 8 | Pet. | n/a | n/a             | TRUE test and Finn Chambers                                 | 3117 | 50 | 1.60 | [5]  |
|                 | 8 | Pet. | 48  | 48              | TRUE test                                                   | 3460 | 55 | 1.60 | [52] |
|                 | 8 | Pet. | 48  | 72              | TRUE test applied to the upper back                         | 1236 | 22 | 1.80 | [53] |
|                 | 8 | Pet. | 48  | 48              | TRUE test applied to the upper back                         | 469  | 11 | 2.30 | [55] |
|                 | 8 | Pet. | 48  | 48, 96          | IQ Chambers                                                 | 205  | 5  | 2.40 | [34] |
|                 | 8 | Pet. | 48  | 48              | Finn Chambers using Scanpor adhesive tape on the upper back | 2545 | 63 | 2.50 | [58] |
|                 | 8 | Pet. | n/a | n/a             | TRUE test and Finn Chambers                                 | 3117 | 82 | 2.60 | [5]  |

|                                    |     |      |     |                 |                                         |        |     |       |      |
|------------------------------------|-----|------|-----|-----------------|-----------------------------------------|--------|-----|-------|------|
|                                    | 8   | Pet. | 48  | 72              | TRUE test applied to the upper back     | 531    | 18  | 3.40  | [53] |
|                                    | 8   | Pet. | 48  | 48, 72, 96, 168 | n/a                                     | 399    | 18  | 4.50  | [24] |
|                                    | 8   | Pet. | 48  | 72, 96          | n/a                                     | 14 728 | 869 | 5.90  | [10] |
|                                    | 8   | Pet. | 48  | 48, 72, 96, 168 | n/a                                     | 1396   | 107 | 7.70  | [35] |
|                                    | 8   | Pet. | 48  | 48, 72, 96, 168 | n/a                                     | 1470   | 115 | 7.80  | [25] |
|                                    | 8   | Pet. | 48  | 72              | Finn Chambers applied on the upper back | 1141   | 181 | 15.90 | [56] |
| <b>Fragrance Mix II</b>            | 14  | Pet. | n/a | n/a             | TRUE test and Finn Chambers             | 3117   | 60  | 0.90  | [5]  |
| <b>Geraniol</b>                    | 2   | Pet. | 48  | n/a             | TRUE Test and Finn Chambers             | 3117   | 13  | 0.40  | [5]  |
| <b>Hydroxycitronellal</b>          | 2   | Pet. | 48  | n/a             | TRUE Test and Finn Chambers             | 3117   | 15  | 0.50  | [5]  |
| <b>Imidiazolidynyl urea</b>        | 2   | Pet. | n/a | n/a             | TRUE test and Finn Chambers             | 3117   | 6   | 0.20  | [5]  |
|                                    | 2   | Pet. | 48  | 48, 96          | IQ Chambers                             | 205    | 1   | 0.50  | [34] |
|                                    | 2   | Pet. | 48  | 48, 96          | TRUE test applied to the upper back     | 201    | 1   | 0.50  | [57] |
|                                    | 2   | Pet. | 48  | 48, 72, 96, 168 | n/a                                     | 1398   | 8   | 0.60  | [35] |
| <b>Iodopropynyl butylcarbamate</b> | 0.2 | Pet. | 48  | 48, 96          | TRUE test applied to the upper back     | 201    | 1   | 0.50  | [57] |
|                                    | 0.2 | Pet. | 48  | 48, 72, 96, 168 | n/a                                     | 1451   | 8   | 0.60  | [25] |
|                                    | 0.2 | Pet. | 48  | 48, 72, 96, 168 | n/a                                     | 1395   | 8   | 0.60  | [35] |
|                                    | 0.2 | Pet. | 48  | 48, 72, 96, 168 | n/a                                     | 1390   | 10  | 0.70  | [35] |
| <b>Isopropyl myristate</b>         | 20  | Pet. | 48  | 48, 96          | TRUE test applied to the upper back     | 201    | 0   | 0.00  | [57] |

|                                                                               |      |      |     |                    |                                                                   |      |    |      |      |
|-------------------------------------------------------------------------------|------|------|-----|--------------------|-------------------------------------------------------------------|------|----|------|------|
| <b>Lanolin</b>                                                                | 30   | Pet. | 48  | 48, 72, 96,<br>168 | n/a                                                               | 1401 | 8  | 0.60 | [35] |
|                                                                               | 30   | Pet. | 48  | 48, 72, 96,<br>168 | n/a                                                               | 399  | 5  | 1.30 | [24] |
| <b>Hydroxyisohexyl 3-cyclohexene<br/>carboxaldehyde (HICC) - Lyril</b>        | 5    | Pet. | n/a | n/a                | TRUE test and Finn<br>Chambers                                    | 3117 | 45 | 1.40 | [5]  |
|                                                                               | 5    | Pet. | 48  | 48, 72, 96,<br>168 | n/a                                                               | 398  | 8  | 2.00 | [24] |
|                                                                               | 5    | Pet. | 48  | 48, 72, 96,<br>168 | n/a                                                               | 1398 | 55 | 4.00 | [35] |
| <b>Methylchloroisothiazolinone</b>                                            | 0.01 | Aq.  | 48  | 48, 96             | IQ Chambers                                                       | 205  | 0  | 0.00 | [34] |
|                                                                               | 0.01 | Aq.  | 48  | 48                 | TRUE test                                                         | 3460 | 6  | 0.20 | [52] |
|                                                                               | 0.01 | Aq.  | 48  | 72                 | TRUE test applied to<br>the upper back                            | 1236 | 8  | 0.60 | [53] |
| <b>Methylchloroisothiazolinone/<br/>Methylisothiazolinone</b>                 | 0.01 | Aq.  | 48  | 48                 | TRUE test applied to<br>the upper back                            | 290  | 0  | 0.00 | [55] |
|                                                                               | 0.01 | Aq.  | 48  | 48                 | TRUE test applied to<br>the upper back                            | 469  | 1  | 0.20 | [55] |
|                                                                               | 0.01 | Aq.  | n/a | n/a                | Finn Chambers on<br>Scanpor                                       | 593  | 1  | 0.20 | [58] |
|                                                                               | 0.01 | Aq.  | n/a | n/a                | TRUE test and Finn<br>Chambers                                    | 3117 | 15 | 0.50 | [5]  |
|                                                                               | 0.02 | Aq.  | 48  | 48, 96             | TRUE test applied to<br>the upper back                            | 201  | 1  | 0.50 | [57] |
|                                                                               | 0.01 | Aq.  | 48  | 48                 | Finn Chambers using<br>Scanpor adhesive tape<br>on the upper back | 1178 | 14 | 1.20 | [58] |
|                                                                               | 0.01 | Aq.  | 48  | 48, 72, 96,<br>168 | n/a                                                               | 399  | 7  | 1.80 | [24] |
| <b>Methylchloroisothiazolinone/<br/>Methylisothiazolinone –<br/>continued</b> | 0.01 | Aq.  | 48  | 48, 72, 96,<br>168 | n/a                                                               | 1395 | 58 | 4.20 | [35] |
| <b>Methylisothiazolinone</b>                                                  | 0.20 | Aq.  | 48  | 48, 96             | TRUE test applied to<br>the upper back                            | 201  | 1  | 0.50 | [57] |
|                                                                               | 0.05 | Aq.  | 48  | 48, 72, 96,<br>168 | n/a                                                               | 1060 | 25 | 2.40 | [35] |

|                                             |      |      |     |                 |                                     |      |    |      |      |
|---------------------------------------------|------|------|-----|-----------------|-------------------------------------|------|----|------|------|
| <b>Methyldibromo Glutaronitrile (MDBGN)</b> | 0.30 | Pet. | 48  | 48, 96          | TRUE test applied to the upper back | 201  | 1  | 0.50 | [57] |
|                                             | 0.30 | Pet. | 48  | 48, 72, 96, 168 | n/a                                 | 390  | 6  | 1.50 | [24] |
|                                             | 0.30 | Pet. | 48  | 72              | Finn Chambers                       | 1141 | 19 | 1.70 | [56] |
|                                             | 0.30 | Pet. | 48  | 48, 72, 96, 168 | n/a                                 | 1392 | 46 | 3.30 | [35] |
| <b>Mercaptobenzothiazole</b>                | 2.0  | Pet. | 48  | 48              | TRUE test                           | 3460 | 0  | 0.00 | [52] |
|                                             | 2.0  | Pet. | 48  | 72              | TRUE test applied to the upper back | 1236 | 1  | 0.10 | [53] |
|                                             | 2.0  | Pet. | 48  | 48              | TRUE test applied to the upper back | 567  | 1  | 0.20 | [54] |
|                                             | 2.0  | Pet. | 48  | 72              | TRUE test applied to the upper back | 567  | 1  | 0.20 | [52] |
|                                             | 2.0  | Pet. | 48  | 48, 72, 96, 168 | n/a                                 | 399  | 1  | 0.30 | [24] |
|                                             | 2.0  | Pet. | 48  | 72              | Finn Chambers                       | 1141 | 3  | 0.30 | [56] |
|                                             | 2.0  | Pet. | 48  | 48, 72, 96, 168 | n/a                                 | 1402 | 9  | 0.60 | [35] |
| <b>Mercapto mix</b>                         | 2.0  | Pet. | 48  | 48              | TRUE test                           | 3460 | 0  | 0.00 | [52] |
|                                             | 2.0  | Pet. | n/a | n/a             | TRUE test and Finn Chambers         | 3117 | 7  | 0.20 | [5]  |
|                                             | 2.0  | Pet. | 48  | 72              | TRUE test applied to the upper back | 1236 | 3  | 0.20 | [53] |
|                                             | 2.0  | Pet. | 48  | 48              | TRUE test applied to the upper back | 469  | 1  | 0.20 | [55] |
|                                             | 2.0  | Pet. | 48  | 72              | Finn Chambers                       | 1141 | 3  | 0.3  | [56] |
|                                             | 2.0  | Pet. | 48  | 48, 72, 96, 168 | n/a                                 | 399  | 1  | 0.30 | [24] |
|                                             | 2.0  | Pet. | 48  | 48              | TRUE test applied to the upper back | 567  | 2  | 0.40 | [54] |
|                                             | 2.0  | Pet. | 48  | 48              | TRUE test                           | 567  | 2  | 0.40 | [52] |
|                                             | 2.0  | Pet. | 48  | 48              | TRUE test applied to the upper back | 290  | 2  | 0.70 | [55] |

|                    |     |      |     |                    |                                        |      |    |      |      |
|--------------------|-----|------|-----|--------------------|----------------------------------------|------|----|------|------|
| Neomycin sulfate   | 2.0 | Pet. | 48  | 48, 72, 96,<br>168 | n/a                                    | 1402 | 12 | 0.90 | [35] |
|                    | 2.0 | Pet. | 48  | 48, 96             | IQ Chambers                            | 205  | 3  | 1.50 | [34] |
|                    | 20  | Pet. | 48  | 48                 | TRUE test applied to<br>the upper back | 567  | 0  | 0.00 | [54] |
|                    | 20  | Pet. | 48  | 48                 | TRUE test                              | 567  | 0  | 0.00 | [52] |
|                    | 20  | Pet. | 48  | 48                 | TRUE test                              | 3460 | 2  | 0.10 | [52] |
|                    | 20  | Pet. | n/a | n/a                | TRUE test and Finn<br>Chambers         | 3117 | 11 | 0.40 | [5]  |
|                    | 20  | Pet. | 48  | 72                 | TRUE test applied to<br>the upper back | 1236 | 6  | 0.50 | [53] |
|                    | 20  | Pet. | 48  | 48, 72, 96,<br>168 | n/a                                    | 1400 | 17 | 1.20 | [35] |
|                    | 20  | Pet. | 48  | 72                 | Finn Chambers                          | 1141 | 16 | 1.40 | [56] |
| Paraben Mix        | 16  | Pet. | 48  | 48, 96             | IQ Chambers                            | 205  | 0  | 0.00 | [34] |
|                    | 16  | Pet. | 48  | 48, 72, 96,<br>168 | n/a                                    | 399  | 0  | 0.00 | [24] |
|                    | 16  | Pet. | 48  | 48                 | TRUE test                              | 3460 | 0  | 0.00 | [52] |
|                    | 16  | Pet. | n/a | n/a                | TRUE test and Finn<br>Chambers         | 3117 | 3  | 0.10 | [5]  |
|                    | 16  | Pet. | 48  | 72                 | TRUE test applied to<br>the upper back | 1236 | 1  | 0.10 | [53] |
|                    | 16  | Pet. | 48  | 48, 72, 96,<br>168 | n/a                                    | 1402 | 4  | 0.30 | [35] |
|                    | 16  | Pet. | 48  | 48                 | TRUE test applied to<br>the upper back | 567  | 2  | 0.40 | [54] |
|                    | 16  | Pet. | 48  | 48                 | TRUE test                              | 567  | 2  | 0.40 | [52] |
|                    | 16  | Pet. | 48  | 48, 96             | TRUE test applied to<br>the upper back | 201  | 1  | 0.50 | [57] |
|                    | 16  | Pet. | 48  | 72                 | Finn Chambers                          | 1141 | 7  | 0.60 | [56] |
|                    | 16  | Pet. | n/a | n/a                | Finn Chambers on<br>Scanpor            | 593  | 4  | 0.70 | [58] |
|                    | 1   | Pet. | 48  | 48, 96             | IQ Chambers                            | 205  | 0  | 0.00 | [34] |
| p-Phenylenediamine | 1   | Pet. | 48  | 48                 | TRUE test applied to<br>the upper back | 567  | 0  | 0.00 | [54] |

|                             |      |      |     |                 |                                                                    |      |    |      |      |
|-----------------------------|------|------|-----|-----------------|--------------------------------------------------------------------|------|----|------|------|
|                             | 1    | Pet. | 48  | 48              | TRUE test applied to the upper back                                | 290  | 0  | 0.00 | [55] |
|                             | 1    | Pet. | 48  | 48              | TRUE test                                                          | 567  | 0  | 0.00 | [52] |
|                             | 1    | Pet. | 48  | 48              | TRUE test                                                          | 3460 | 4  | 0.10 | [52] |
|                             | 1    | Pet. | 48  | 48              | TRUE test applied to the upper back                                | 469  | 1  | 0.20 | [55] |
|                             | 1    | Pet. | 48  | 72              | TRUE test applied to the upper back                                | 1236 | 4  | 0.30 | [53] |
|                             | 1    | Pet. | n/a | n/a             | Finn Chambers on Scanpor                                           | 593  | 3  | 0.50 | [58] |
|                             | 1    | Pet. | n/a | n/a             | TRUE test and Finn Chambers                                        | 3117 | 30 | 1.00 | [5]  |
|                             | 1    | Pet. | 48  | 72              | Finn Chambers and TRUE Test applied on the back                    | 3662 | 51 | 1.40 | [32] |
|                             | 1    | Pet. | 48  | 72              | Finn Chambers applied on the upper back                            | 1141 | 17 | 1.50 | [56] |
|                             | 1    | Pet. | 48  | 72, 144, 168    | IQ Chambers from Chemotechnique Diagnostics AB applied on the back | 3825 | 77 | 2.00 | [32] |
|                             | 1    | Pet. | 48  | 72, 144, 168    | IQ Chambers from Chemotechnique Diagnostics AB applied on the back | 3112 | 65 | 2.10 | [32] |
|                             | 1    | Pet. | 48  | 48, 72, 96, 168 | n/a                                                                | 1396 | 36 | 2.60 | [35] |
|                             | 1    | Pet. | 48  | 48              | Finn Chambers using Scanpor adhesive tape on the upper back        | 2545 | 69 | 2.70 | [58] |
|                             | 1    | Pet. | 48  | 48, 96          | Finn Chambers secured with Scanpor tape and left on the back       | 3062 | 92 | 3.00 | [39] |
|                             | 1    | Pet. | 48  | 48, 72, 96, 168 | n/a                                                                | 399  | 36 | 9.00 | [24] |
| <b>Potassium dichromate</b> | 0.50 | Pet. | 48  | 48              | TRUE test                                                          | 3460 | 5  | 0.10 | [52] |

|                              |      |      |     |                 |                                         |      |    |       |      |
|------------------------------|------|------|-----|-----------------|-----------------------------------------|------|----|-------|------|
|                              | 0.50 | Pet. | 48  | 48              | TRUE test applied to the upper back     | 290  | 1  | 0.30  | [55] |
|                              | 0.50 | Pet. | 48  | 48              | TRUE test applied to the upper back     | 567  | 3  | 0.50  | [54] |
|                              | 0.50 | Pet. | 48  | 48              | TRUE test                               | 567  | 3  | 0.60  | [52] |
|                              | 0.50 | Pet. | n/a | n/a             | TRUE test and Finn Chambers             | 3117 | 25 | 0.80  | [5]  |
|                              | 0.50 | Pet. | 48  | 72              | TRUE test applied to the upper back     | 1236 | 10 | 0.80  | [53] |
|                              | 0.50 | Pet. | 48  | 72              | TRUE test applied to the upper back     | 531  | 4  | 0.80  | [53] |
|                              | 0.50 | Pet. | 48  | 72              | Finn Chambers applied on the upper back | 1141 | 12 | 1.10  | [56] |
|                              | 0.50 | Pet. | 48  | 48              | TRUE test applied to the upper back     | 469  | 5  | 1.10  | [55] |
|                              | 0.50 | Pet. | 48  | 48, 72, 96, 168 | n/a                                     | 1401 | 39 | 2.80  | [35] |
|                              | 0.50 | Pet. | 48  | 48, 96          | IQ Chambers                             | 205  | 5  | 2.40  | [34] |
| <b>Propylene glycol</b>      | 5    | Pet. | 48  | 48, 96          | TRUE test applied to the upper back     | 201  | 0  | 0.00  | [57] |
| <b>Propyl gallate</b>        | 1    | Pet. | 48  | 48, 96          | TRUE test applied to the upper back     | 201  | 0  | 0.00  | [57] |
| <b>Sorbitan sesquioleate</b> | 20   | Pet. | 48  | 48, 96          | TRUE test applied to the upper back     | 201  | 1  | 0.50  | [57] |
| <b>Thimerosal</b>            | 0.10 | Pet  | 48  | 48              | TRUE test                               | 3460 | 18 | 0.50  | [52] |
|                              | 0.10 | Pet  | 48  | 72              | TRUE test applied to the upper back     | 1236 | 23 | 1.90  | [53] |
|                              | 0.10 | Pet  | 48  | 48, 96          | TRUE test applied to the upper back     | 201  | 39 | 19.40 | [57] |
|                              | 0.10 | Pet  | 48  | 48              | TRUE test applied to the upper back     | 469  | 10 | 2.10  | [55] |
|                              | 0.10 | Pet  | 48  | 48              | TRUE test applied to the upper back     | 290  | 8  | 2.80  | [55] |
|                              | 0.10 | Pet  | 48  | 48              | TRUE test applied to the upper back     | 567  | 19 | 3.40  | [54] |
|                              | 0.10 | Pet  | 48  | 48              | TRUE test                               | 567  | 19 | 3.50  | [52] |

|                       |      |      |     |                 |                                         |      |      |      |      |
|-----------------------|------|------|-----|-----------------|-----------------------------------------|------|------|------|------|
|                       | 0.10 | Pet  | 48  | 72              | Finn Chambers applied on the upper back | 1141 | 54   | 4.70 | [56] |
|                       | 0.10 | Pet  | n/a | n/a             | TRUE test and Finn Chambers             | 3117 | 155  | 5.00 | [5]  |
| Thiuram mix           | 1    | Pet. | 48  | 48, 96          | IQ Chambers                             | 205  | 0.00 | 0.00 | [34] |
|                       | 1    | Pet. | 48  | 48              | TRUE test applied to the upper back     | 290  | 0.00 | 0.00 | [55] |
|                       | 1    | Pet. | 48  | 48              | TRUE test                               | 3460 | 3    | 0.10 | [52] |
|                       | 1    | Pet. | 48  | 48              | TRUE test applied to the upper back     | 469  | 2    | 0.40 | [55] |
|                       | 1    | Pet. | n/a | n/a             | TRUE test and Finn Chambers             | 3117 | 15   | 0.50 | [5]  |
|                       | 1    | Pet. | 48  | 48              | TRUE test applied to the upper back     | 567  | 3    | 0.50 | [54] |
|                       | 1    | Pet. | 48  | 72              | TRUE test applied to the upper back     | 1236 | 7    | 0.60 | [53] |
|                       | 1    | Pet. | 48  | 48              | TRUE test                               | 567  | 3    | 0.60 | [52] |
|                       | 1    | Pet. | 48  | 72              | Finn Chambers applied on the upper back | 1141 | 8    | 0.70 | [56] |
|                       | 1    | Pet. | 48  | 48, 72, 96, 168 | n/a                                     | 399  | 10   | 2.50 | [24] |
|                       | 1    | Pet. | 48  | 48, 72, 96, 168 | n/a                                     | 1401 | 75   | 5.40 | [35] |
|                       | 2    | Pet. | 48  | 48, 96          | TRUE test applied to the upper back     | 201  | 0    | 0.00 | [57] |
| Sorbitan sesquioleate | 20   | Pet. | 48  | 48, 96          | TRUE test applied to the upper back     | 201  | 1    | 0.50 | [57] |
| Quaternium 15         | 1    | Pet. | 48  | 48              | TRUE test                               | 543  | 1    | 0.20 | [52] |
|                       | 1    | Pet. | 48  | 48              | TRUE test applied to the upper back     | 567  | 1    | 0.20 | [54] |
|                       | 1    | Pet. | 48  | 48              | TRUE test applied to the upper back     | 469  | 1    | 0.20 | [55] |
|                       | 1    | Pet. | 48  | 48              | TRUE test                               | 3460 | 6    | 0.20 | [52] |
|                       | 1    | Pet. | n/a | n/a             | TRUE test and Finn Chambers             | 3117 | 12   | 0.40 | [5]  |

|               |    |      |     |                 |                                     |      |    |      |      |
|---------------|----|------|-----|-----------------|-------------------------------------|------|----|------|------|
|               | 1  | Pet. | 48  | 72              | TRUE test applied to the upper back | 1236 | 5  | 0.40 | [53] |
|               | 1  | Pet. | 48  | 48, 96          | TRUE test applied to the upper back | 201  | 1  | 0.50 | [57] |
|               | 1  | Pet. | 48  | 48, 72, 96, 168 | n/a                                 | 399  | 4  | 1.00 | [24] |
|               | 1  | Pet. | 48  | 48, 72, 96, 168 | n/a                                 | 1402 | 17 | 1.20 | [35] |
|               | 1  | Pet. | 48  | 48, 72, 96, 168 | n/a                                 | 1471 | 20 | 1.40 | [25] |
|               | 1  | Pet. | 48  | 48, 72, 96, 168 | n/a                                 | 1398 | 26 | 1.90 | [35] |
| Quinoline mix | 6  | Pet. | 48  | 48              | TRUE test                           | 3460 | 2  | 0.10 | [52] |
|               | 6  | Pet. | 48  | 72              | TRUE test applied to the upper back | 1236 | 1  | 0.10 | [53] |
|               | 6  | Pet. | n/a | n/a             | TRUE test and Finn Chambers         | 3117 | 5  | 0.20 | [5]  |
|               | 6  | Pet. | 48  | 48              | TRUE test applied to the upper back | 567  | 2  | 0.40 | [54] |
|               | 6  | Pet. | 48  | 48              | TRUE test                           | 567  | 2  | 0.40 | [52] |
|               | 6  | Pet. | 48  | 72              | TRUE test applied to the upper back | 531  | 3  | 0.60 | [53] |
|               | 6  | Pet. | 48  | 48, 72, 96, 168 | n/a                                 | 702  | 5  | 0.70 | [35] |
| Wool Acohols  | 30 | Pet. | 48  | 72              | TRUE test applied to the upper back | 1236 | 1  | 0.10 | [53] |
|               | 30 | Pet. | 48  | 48              | TRUE test applied to the upper back | 567  | 1  | 0.20 | [54] |
|               | 30 | Pet. | 48  | 48              | TRUE test                           | 567  | 1  | 0.20 | [52] |
|               | 30 | Pet. | 48  | 48              | TRUE test applied to the upper back | 469  | 1  | 0.20 | [55] |
|               | 30 | Pet. | 48  | 48              | TRUE test applied to the upper back | 290  | 1  | 0.30 | [55] |
|               | 30 | Pet. | n/a | n/a             | TRUE test and Finn Chambers         | 3119 | 14 | 0.40 | [5]  |

|    |      |    |    |                                            |      |    |      |      |
|----|------|----|----|--------------------------------------------|------|----|------|------|
| 30 | Pet. | 48 | 72 | Finn Chambers applied<br>on the upper back | 1141 | 16 | 1.40 | [56] |
|----|------|----|----|--------------------------------------------|------|----|------|------|

Table S3. Selected descriptors which are a key to discrimination of molecules according to their sensitizing effects.

| eAR        |                                                                                           | eOR        |                                                                          |
|------------|-------------------------------------------------------------------------------------------|------------|--------------------------------------------------------------------------|
| Descriptor | Explanation                                                                               | Descriptor | Explanation                                                              |
| AATS6p     | Average Broto-Moreau autocorrelation - lag 6 / weighted by polarizabilities               | AATS6m     | Average Broto-Moreau autocorrelation - lag 6 / weighted by mass          |
| ATSC5v     | Centered Broto-Moreau autocorrelation - lag 5 / weighted by van der Waals volumes         | AATS8m     | Average Broto-Moreau autocorrelation - lag 8 / weighted by mass          |
| ATSC3p     | Centered Broto-Moreau autocorrelation - lag 3 / weighted by polarizabilities              | ATSC7m     | Centered Broto-Moreau autocorrelation - lag 7 / weighted by mass         |
| AATSC3v    | Average centered Broto-Moreau autocorrelation - lag 3 / weighted by van der Waals volumes | AATSC7m    | Average centered Broto-Moreau autocorrelation - lag 7 / weighted by mass |
| AATSC3p    | Average centered Broto-Moreau autocorrelation - lag 3 / weighted by polarizabilities      | GATS3s     | Geary autocorrelation - lag 3 / weighted by I-state                      |
| MATS3v     | Moran autocorrelation - lag 3 / weighted by van der Waals volumes                         | nHAvin     | Count of atom-type H E-State: H on C vinyl bonded to C aromatic          |

|                      |                                                                        |         |                                                             |
|----------------------|------------------------------------------------------------------------|---------|-------------------------------------------------------------|
| <b>MATS2p</b>        | Moran autocorrelation - lag 2 / weighted by polarizabilities           | naaaC   | Count of atom-type E-State: ::C:                            |
| <b>MATS3p</b>        | Moran autocorrelation - lag 3 / weighted by polarizabilities           | naaN    | Count of atom-type E-State: :NH:                            |
| <b>GATS3p</b>        | Geary autocorrelation - lag 3 / weighted by polarizabilities           | SaaaC   | Sum of atom-type E-State: ::C:                              |
| <b>GATS4p</b>        | Geary autocorrelation - lag 4 / weighted by polarizabilities           | SaaN    | Sum of atom-type E-State: :NH:                              |
| <b>GATS2i</b>        | Geary autocorrelation - lag 2 / weighted by first ionization potential | minaaaC | Minimum atom-type E-State: ::C:                             |
| <b>VC-3</b>          | Valence cluster, order 3                                               | minaaN  | Minimum atom-type E-State: :NH:                             |
| <b>VC-4</b>          | Valence cluster, order 4                                               | maxaaaC | Maximum atom-type E-State: ::C:                             |
| <b>naaaC</b>         | Count of atom-type E-State: ::C:                                       | maxaaN  | Maximum atom-type E-State: :NH:                             |
| <b>naaN</b>          | Count of atom-type E-State: :NH:                                       | piPC6   | Conventional bond order ID number of order 6 ( $\ln(1+x)$ ) |
| <b>SHAvin</b>        | Sum of atom-type H E-State: H on C vinyl bonded to C aromatic          | piPC7   | Conventional bond order ID number of order 7 ( $\ln(1+x)$ ) |
| <b>minHdsCH</b>      | Minimum atom-type H E-State: =CH-                                      | SRW5    | Self-returning walk count of order 5 ( $\ln(1+x)$ )         |
| <b>minHAvin</b>      | Minimum atom-type H E-State: H on C vinyl bonded to C aromatic         |         |                                                             |
| <b>maxHaaCH</b>      | Maximum atom-type H E-State: :CH:                                      |         |                                                             |
| <b>maxHAvin</b>      | Maximum atom-type H E-State: H on C vinyl bonded to C aromatic         |         |                                                             |
| <b>ETA_Shape_X</b>   | Shape index X                                                          |         |                                                             |
| <b>ETA_Beta_ns_d</b> | A measure of lone electrons entering into resonance                    |         |                                                             |
| <b>JGI1</b>          | Mean topological charge index of order 1                               |         |                                                             |
| <b>JGI9</b>          | Mean topological charge index of order 9                               |         |                                                             |

**Table S4. Comparison of LLNA and in vitro test results of cosmetic ingredients and topical drugs with predicted results by the in silico model.**

| Substance                       | Hapten                                    | Present study |           |                       |           | Published data |          |
|---------------------------------|-------------------------------------------|---------------|-----------|-----------------------|-----------|----------------|----------|
|                                 |                                           | eAR           | In silico | eOR                   | In silico | LLNA           | In vitro |
| <b>Ammylcinnamyl alcohol</b>    | Ammylcinnamyl alcohol                     | 0             | 1         | 1                     | 1         | n/a            | n/a      |
| <b>Myroxylon pereirae resin</b> | Myroxylon pereirae resin                  | 1             | 1         | 1                     | 0         | 1              | 0        |
| <b>Benzocaine</b>               | Benzocaine                                | 0             | 0         | 0                     | 1         | 0              | 1        |
| <b>Benzyl alcohol</b>           | Benzyl alcohol                            | 0             | 0         | 1                     | 1         | 0              | 0        |
| <b>Benzyl salicylate</b>        | Benzyl salicylate                         | 0             | 0         | 0                     | 1         | 1              | 0        |
| <b>Black rubber mix</b>         | N-Isopropyl-N'-phenyl-p-phenylenediamine  | 0             | 0         | excluded <sup>†</sup> |           | n/a            | n/a      |
|                                 | N-Cyclohexyl-N'-phenyl-p-phenylenediamine | 0             | 0         |                       |           | n/a            | n/a      |

|                                                                     |                                              |   |   |   |   |     |     |
|---------------------------------------------------------------------|----------------------------------------------|---|---|---|---|-----|-----|
|                                                                     | N,N'-Diphenyl-paraphenylenediamine           | 0 | 0 |   |   | n/a | n/a |
| <b>Butylhydroxyanisole (BHA)</b>                                    | Butylhydroxyanisole                          | 1 | 1 | 1 | 1 | n/a | n/a |
| <b>Bronopol</b>                                                     | Bronopol                                     | 1 | 1 | 1 | 0 | n/a | n/a |
| <b>Cinnamal</b>                                                     | Cinnamal                                     | 1 | 1 | 1 | 1 | 1   | 1   |
| <b>Cinnamyl alcohol</b>                                             | Cinnamyl alcohol                             | 1 | 1 | 1 | 1 | 1   | 1   |
| <b>Citral</b>                                                       | Citral                                       | 0 | 1 | 1 | 1 | 1   | 1   |
| <b>Cocamidopropyl betaine</b>                                       | Cocamidopropyl betaine                       | 1 | 1 | 0 | 0 | 0   | 0   |
| <b>Colophonium</b>                                                  | Colophonium                                  | 1 | 1 | 1 | 1 | n/a | n/a |
| <b>Diazolidynyl urea</b>                                            | Diazolidynyl Urea                            | 1 | 1 | 1 | 0 | n/a | n/a |
| <b>DMDM Hydantoin</b>                                               | DMDMD Hydantoin                              | 1 | 1 | 1 | 0 | n/a | n/a |
| <b>Epoxy resin</b>                                                  | Epichlorohydrin                              | 0 | 0 | 0 | 0 | n/a | n/a |
|                                                                     | Isopropylidenediphenol                       | 0 | 0 | 0 | 0 | n/a | n/a |
| <b>Evernia prunastri extract</b>                                    | Evernia prunastri extract                    | 0 | 0 | 0 | 0 | n/a | n/a |
| <b>Farnesol</b>                                                     | Farnesol                                     | 0 | 0 | 0 | 0 | 1   | 1   |
| <b>Formaldehyde</b>                                                 | Formaldehyde                                 | 1 | 1 | 1 | 1 | 1   | 1   |
| <b>Geraniol</b>                                                     | Geraniol                                     | 1 | 0 | 1 | 1 | 1   | 1   |
| <b>Hydroxycitronellal</b>                                           | Hydroxycitronellal                           | 1 | 1 | 1 | 0 | 1   | 1   |
| <b>Imidazolidynyl urea</b>                                          | Imidazolidynyl urea                          | 0 | 0 | 0 | 0 | 1   | 1   |
| <b>Iodopropynyl butylcarbamate</b>                                  | Iodopropynyl butylcarbamate                  | 0 | 0 | 0 | 0 | 1   | 1   |
| <b>Isopropyl myristate</b>                                          | Isopropyl myristate                          | 0 | 0 | 1 | 0 | 1   | 0   |
| <b>Lanolin</b>                                                      | Lanolin                                      | 0 | 0 | 0 | 0 | n/a | n/a |
| <b>Hydroxyisohexyl 3-cyclohexene carboxaldehyde (HICC) - Lyrall</b> | Hydroxyisohexyl 3-cyclohexene carboxaldehyde | 0 | 1 | 0 | 0 | 1   | 1   |
| <b>Mercapto mix</b>                                                 | 2,2'-Benzothiazyl disulfide                  | 0 | 0 | 0 | 0 | n/a | n/a |
|                                                                     | 4-Morpholinyl-2-benzothiazyl disulfide       | 0 | 0 | 0 | 0 | n/a | n/a |
|                                                                     | N-Cyclohexyl-2-benzothiazolesulfenamide      | 0 | 0 | 0 | 0 | n/a | n/a |
| <b>Mercaptobenzothiazole</b>                                        | Mercaptobenzothiazole                        | 0 | 0 | 1 | 1 | 1   | 1   |
| <b>Methylchloroisothiazolinone (MCI)</b>                            | Methylchloroisothiazolinone                  | 1 | 1 | 1 | 0 | 1   | 1   |
| <b>Methyldibromo Glutaronitrile (MDBGN)</b>                         | Methyldibromo Glutaronitrile                 | 1 | 1 | 0 | 0 | 1   | 1   |
| <b>Methylisothiazolinone (MI)</b>                                   | Methylisothiazolinone                        | 1 | 1 | 0 | 0 | 1   | n/a |

|                          |                    |   |   |                       |   |     |     |
|--------------------------|--------------------|---|---|-----------------------|---|-----|-----|
| Neomycin sulfate         | Neomycin sulfate   | 1 | 0 | 1                     | 1 | n/a | n/a |
| Paraben mix              | Methylparaben      | 0 | 0 | excluded <sup>†</sup> |   | 0   | 1   |
|                          | Butylparaben       | 0 | 0 |                       |   | n/a | n/a |
|                          | Ethylparaben       | 0 | 0 |                       |   | n/a | n/a |
|                          | Propylparaben      | 0 | 0 |                       |   | 0   | 1   |
|                          |                    |   |   |                       |   |     |     |
| p-Phenylenediamine (PPD) | p-Phenylenediamine | 1 | 0 | 1                     | 1 | 1   | 1   |
| Propyl gallate           | Propyl gallate     | 0 | 0 | 1                     | 1 | 1   | 1   |
| Quaternium 15            | Quaternium 15      | 1 | 1 | 1                     | 1 | n/a | n/a |
| Quinoline mix            | Quinoline          | 0 | 0 | 0                     | 0 | n/a | n/a |
|                          | Chlorquinadol      | 0 | 0 | 0                     | 0 | n/a | n/a |
| Sorbitan sesquioleate    | Sorbitol           | 0 | 0 | 0                     | 1 | n/a | n/a |
|                          | Oleic acid         | 0 | 0 | 0                     | 0 | n/a | n/a |
| Thimerosal               | Thimerosal         | 1 | 0 | 1                     | 1 | n/a | n/a |
| Triethanolamine          | Triethanolamine    | 0 | 0 | 1                     | 1 | n/a | n/a |

<sup>†</sup>- multi-component ingredients with known sensitizing potential ("1") were excluded from the learning process, see explanations in text.

n/a – data not available

Table S5. Settings of WEKA classification algorithms tested during the model development process.

| Algorithm              | Algorithm settings                                                                                                                                                     |
|------------------------|------------------------------------------------------------------------------------------------------------------------------------------------------------------------|
| Naïve Bayes classifier | weka.classifiers.bayes.NaiveBayes                                                                                                                                      |
| Bayes nets             | weka.classifiers.bayes.BayesNet -D -Q weka.classifiers.bayes.net.search.local.K2 -- -P 1 -S BAYES -E weka.classifiers.bayes.net.estimate.SimpleEstimator -- -A 0.5     |
| Multilayer Perceptron  | weka.classifiers.functions.MultilayerPerceptron -L 0.3 -M 0.2 -N 500 -V 0 -S 0 -E 20 -H a weka.classifiers.functions.SMO -C 1.0 -L 0.001 -P 1.0E-12 -N 0 -V -1 -W 1 -K |
| SMO                    | "weka.classifiers.functions.supportVector.PolyKernel -E 1.0 -C 250007" -calibrator "weka.classifiers.functions.Logistic -R 1.0E-8 -M -1 -num-decimal-places            |
| kStar                  | weka.classifiers.lazy.KStar -B 20 -M a                                                                                                                                 |
| RandomComittee         | weka.classifiers.meta.RandomCommittee -S 1 -num-slots 1 -I 10 -W weka.classifiers.trees.RandomTree -- -K 0 -M 1.0 -V 0.001 -S 1                                        |
| DecisionTable          | weka.classifiers.rules.DecisionTable -X 1 -S "weka.attributeSelection.BestFirst -D 1 -N 5"                                                                             |
| J48                    | weka.classifiers.trees.J48 -C 0.25 -M 2                                                                                                                                |

|                     |                                                                                          |
|---------------------|------------------------------------------------------------------------------------------|
| <b>RandomTree</b>   | weka.classifiers.trees.RandomTree -K 0 -M 1.0 -V 0.001 -S 1                              |
| <b>RandomForest</b> | weka.classifiers.trees.RandomForest -P 100 -I 100 -num-slots 1 -K 0 -M 1.0 -V 0.001 -S 1 |

## References:

1. An, S.; Lee, A.-Y.; Lee, C.H.; Kim, W.; Hahm, J.H.; Kim, K.-J.; Moon, K.-C.; Won, Y.H.; Ro, Y.-S.; Eun, H.C. Fragrance contact dermatitis in Korea: A joint study. *Contact Dermat.* **2005**, *53*, 320–323. <https://doi.org/10.1111/j.0105-1873.2005.00720.x>.
2. Heisterberg, M.V.; Menné, T.; Johansen, J.D. Contact allergy to the 26 specific fragrance ingredients to be declared on cosmetic products in accordance with the EU cosmetics directive. *Contact Dermat.* **2011**, *65*, 266–275. <https://doi.org/10.1111/j.1600-0536.2011.01962.x>.
3. Vejanurug, P.; Tresukosol, P.; Sajjachareonpong, P.; Puangpet, P. Fragrance allergy could be missed without patch testing with 26 individual fragrance allergens. *Contact Dermat.* **2016**, *74*, 230–235. <https://doi.org/10.1111/cod.12522>.
4. Wetter, D.A.; Yiannias, J.A.; Prakash, A.V.; Davis, M.D.; Farmer, S.A.; El-Azhary, R.A. Results of patch testing to personal care product allergens in a standard series and a supplemental cosmetic series: An analysis of 945 patients from the Mayo Clinic Contact Dermatitis Group, 2000-2007. *J. Am. Acad. Dermatol.* **2010**, *63*, 789–798. <https://doi.org/10.1016/j.jaad.2009.11.033>.
5. Diepgen, T.L.; Ofenloch, R.F.; Bruze, M.; Bertuccio, P.; Cazzaniga, S.; Coenraads, P.-J.; Elsner, P.; Goncalo, M.; Svensson, Å.; Naldi, L. Prevalence of contact allergy in the general population in different European regions. *Br. J. Dermatol.* **2016**, *174*, 319–329. <https://doi.org/10.1111/bjd.14167>.
6. Boyvat, A.; Akyol, A.; Gürgey, E. Contact sensitivity to preservatives in Turkey. *Contact Dermat.* **2005**, *52*, 329–332. <https://doi.org/10.1111/j.0105-1873.2005.00607.x>.

7. Larsen, W.; Nakayama, H.; Fischer, T.; Elsner, P.; Frosch, P.; Burrows, D.; Jordan, W.; Shaw, S.; Wilkinson, J.; Marks, J.; et al. Fragrance contact dermatitis: A worldwide multicenter investigation (Part II). *Contact Dermat.* **2001**, *44*, 344–346. <https://doi.org/10.1034/j.1600-0536.2001.044006344.x>.
8. Nardelli, A.; Carbonez, A.; Drieghe, J.; Goossens, A. Results of patch testing with fragrance mix 1, fragrance mix 2, and their ingredients, and *Myroxylon pereirae* and colophonium, over a 21-year period. *Contact Dermat.* **2013**, *68*, 307–313. <https://doi.org/10.1111/cod.12056>.
9. Kieć-Swierczyńska, M.; Krecisz, B.; Swierczyńska-Machura, D. Contact allergy to fragrances. *Med. Pr.* **2006**, *57*, 431–437.
10. Dinkloh, A.; Worm, M.; Geier, J.; Schnuch, A.; Wollenberg, A. Contact sensitization in patients with suspected cosmetic intolerance: Results of the IVDK 2006–2011. *J. Eur. Acad. Dermatol. Venereol.* **2015**, *29*, 1071–1081. <https://doi.org/10.1111/jdv.12750>.
11. Schnuch, A.; Uter, W.; Geier, J.; Lessmann, H.; Frosch, P.J. Sensitization to 26 fragrances to be labelled according to current European regulation. Results of the IVDK and review of the literature. *Contact Dermat.* **2007**, *57*, 1–10. <https://doi.org/10.1111/j.1600-0536.2007.01088.x>.
12. Uter, W.; Geier, J.; Frosch, P.; Schnuch, A. Contact allergy to fragrances: Current patch test results (2005–2008) from the Information Network of Departments of Dermatology\*. *Contact Dermat.* **2010**, *63*, 254–261. <https://doi.org/10.1111/j.1600-0536.2010.01759.x>.
13. Larsen, W.; Nakayama, H.; Lindberg, M.; Fischer, T.; Elsner, P.; Burrows, D.; Jordan, W.; Shaw, S.; Wilkinson, J.; Marks, J., Jr.; et al. Fragrance contact dermatitis: A worldwide multicenter investigation (Part I). *Am. J. Contact Dermat.* **1996**, *7*, 77–83. [https://doi.org/10.1016/S1046-199X\(96\)90078-0](https://doi.org/10.1016/S1046-199X(96)90078-0).
14. Krecisz, B.; Chomiczewska-Skóra, D.; Kieć-Swierczyńska, M. Preservatives as important etiologic factors of allergic contact dermatitis. *Med. Pr.* **2015**, *66*, 327–332. <https://doi.org/10.13075/mp.5893.00176>.
15. Dastychová, E.; Necas, M.; Vasku, V. Contact hypersensitivity to selected excipients of dermatological topical preparations and cosmetics in patients with chronic eczema. *Acta Dermatovenerol. Alp. Pannonica Adriat.* **2008**, *17*, 61–68.
16. Fairhurst, D.; Shah, M. Comparison of patch test results among white Europeans and patients from the Indian subcontinent living within the same community. *J. Eur. Acad. Dermatol. Venereol.* **2008**, *22*, 1227–1231. <https://doi.org/10.1111/j.1468-3083.2008.02787.x>.
17. Schnuch, A.; Geier, J.; Uter, W.; Frosch, P.J. Patch testing with preservatives, antimicrobials and industrial biocides. Results from a multicentre study. *Br. J. Dermatol.* **1998**, *138*, 467–476. <https://doi.org/10.1046/j.1365-2133.1998.02126.x>.
18. Herbst, R.A.; Uter, W.; Pirker, C.; Geier, J.; Frosch, P.J. Allergic and non-allergic periorbital dermatitis: Patch test results of the Information Network of the Departments of Dermatology during a 5-year period. *Contact Dermat.* **2004**, *51*, 13–19. <https://doi.org/10.1111/j.0105-1873.2004.00334.x>.
19. Davis, M.D.P.; Scalf, L.A.; Yiannias, J.A.; Cheng, J.F.; El-Azhary, R.A.; Rohlinger, A.L.; Farmer, S.A.; Fett, D.D.; Johnson, J.S.; Linehan, D.L.N.; et al. Changing Trends and Allergens in the Patch Test Standard Series: A mayo clinic 5-year retrospective review. *Arch. Dermatol.* **2008**, *144*, 67–72. <https://doi.org/10.1001/archdermatol.2007.2>.
20. Perrenoud, D.; Bircher, A.; Hunziker, T.; Sutter, H.; Bruckner-Tuderman, L.; Stäger, J.; Thürlimann, W.; Schmid, P.; Suard, A.; Swiss Contact Dermatitis Research Group. Frequency of sensitization to 13 common preservatives in Switzerland. *Contact Dermat.* **1994**, *30*, 276–279. <https://doi.org/10.1111/j.1600-0536.1994.tb00597.x>.
21. O'Gorman, S.M.; Torgerson, R.R. Contact allergy in cheilitis. *Int. J. Dermatol.* **2015**, *55*, e386–e391. <https://doi.org/10.1111/ijd.13044>.
22. Lee, S.S.; Hong, D.K.; Jeong, N.J.; Lee, J.H.; Choi, Y.; Lee, A.-Y.; Lee, C.-H.; Kim, K.J.; Park, H.Y.; Yang, J.; et al. Multicenter study of preservative sensitivity in patients with suspected cosmetic contact dermatitis in Korea. *J. Dermatol.* **2012**, *39*, 677–681. <https://doi.org/10.1111/j.1346-8138.2012.01551.x>.
23. Rodrigues, D.F.; Goulart, E.M.A. Patch test results in children and adolescents. Study from the Santa Casa de Belo Horizonte Dermatology Clinic, Brazil, from 2003 to 2010. *An. Bras. Dermatol.* **2015**, *90*, 671–683. <https://doi.org/10.1590/abd1806-4841.20153902>.

24. Schwensen, J.F.; Johansen, J.D.; Veien, N.K.; Funding, A.T.; Avnstorp, C.; Østerballe, M.; Andersen, K.E.; Paulsen, E.; Mortz, C.G.; Sommerlund, M.; et al. Occupational contact dermatitis in hairdressers: An analysis of patch test data from the Danish Contact Dermatitis Group, 2002–2011. *Contact Dermat.* **2013**, *70*, 233–237. <https://doi.org/10.1111/cod.12176>.
25. Schwensen, J.F.; Menné, T.; Veien, N.K.; Funding, A.T.; Avnstorp, C.; Østerballe, M.; Andersen, K.E.; Paulsen, E.; Mortz, C.G.; Sommerlund, M.; et al. Occupational contact dermatitis in blue-collar workers: Results from a multicentre study from the Danish Contact Dermatitis Group (2003–2012). *Contact Dermat.* **2014**, *71*, 348–355. <https://doi.org/10.1111/cod.12277>.
26. Sharma, V.K.; Chakrabarti, A. Common contact sensitizers in Chandigarh, India. A study of 200 patients with the European standard series. *Contact Dermat.* **1998**, *38*, 127–131. <https://doi.org/10.1111/j.1600-0536.1998.tb05677.x>.
27. Yin, R.; Huang, X.Y.; Zhou, X.F.; Hao, F. A retrospective study of patch tests in Chongqing, China from 2004 to 2009. *Contact Dermat.* **2011**, *65*, 28–33. <https://doi.org/10.1111/j.1600-0536.2010.01854.x>.
28. Schnuch, A.; Lessmann, H.; Geier, J.; Uter, W. Contact allergy to preservatives. Analysis of IVDK data 1996–2009. *Br. J. Dermatol.* **2011**, *164*, 1316–1325. <https://doi.org/10.1111/j.1365-2133.2011.10253.x>.
29. Chow, E.T.; Avolio, A.M.; Lee, A.; Nixon, R. Frequency of positive patch test reactions to preservatives: The Australian experience. *Australas. J. Dermatol.* **2012**, *54*, 31–35. <https://doi.org/10.1111/j.1440-0960.2012.00958.x>.
30. Uter, W.; Gefeller, O.; John, S.M.; Schnuch, A.; Geier, J. Contact allergy to ingredients of hair cosmetics—A comparison of female hairdressers and clients based on IVDK 2007–2012 data. *Contact Dermat.* **2014**, *71*, 13–20. <https://doi.org/10.1111/cod.12196>.
31. Cuesta, L.; Silvestre, J.F.; Toledo, F.; Lucas, A.; Ballester, I.; Pérez-Crespo, M.; Ballester, I. Fragrance contact allergy: A 4-year retrospective study. *Contact Dermat.* **2010**, *63*, 77–84. <https://doi.org/10.1111/j.1600-0536.2010.01739.x>.
32. Fall, S.; Bruze, M.; Isaksson, M.; Lidén, C.; Matura, M.; Stenberg, B.; Lindberg, M. Contact allergy trends in Sweden—A retrospective comparison of patch test data from 1992, 2000, and 2009. *Contact Dermat.* **2015**, *72*, 297–304. <https://doi.org/10.1111/cod.12346>.
33. Lestringant, G.G.; Bener, A.; Sawaya, M.; Galadari, I.H.; Frossard, P.M. Allergic contact dermatitis in the United Arab Emirates. *Int. J. Dermatol.* **1999**, *38*, 181–186. <https://doi.org/10.1046/j.1365-4362.1999.00628.x>.
34. Li, L.-F. Contact sensitization to European baseline series of allergens in university students in Beijing. *Contact Dermat.* **2010**, *62*, 371–372. <https://doi.org/10.1111/j.1600-0536.2010.01723.x>.
35. Schwensen, J.; Menné, T.; Sommerlund, M.; Andersen, K.; Mortz, C.; Zachariae, C.; Johansen, J. Contact Allergy in Danish Healthcare Workers: A Retrospective Matched Case-control Study. *Acta Derm. Venereol.* **2016**, *96*, 237–240. <https://doi.org/10.2340/00015555-2202>.
36. Frosch, P.J.; Pirker, C.; Rastogi, S.C.; Andersen, K.E.; Bruze, M.; Svedman, C.; Goossens, A.; White, I.R.; Uter, W.; Arnau, E.G.; et al. Patch testing with a new fragrance mix detects additional patients sensitive to perfumes and missed by the current fragrance mix. *Contact Dermat.* **2005**, *52*, 207–215. <https://doi.org/10.1111/j.0105-1873.2005.00565.x>.
37. Molin, S.; Bauer, A.; Schnuch, A.; Geier, J. Occupational contact allergy in nurses: Results from the Information Network of Departments of Dermatology 2003–2012. *Contact Dermat.* **2014**, *72*, 164–171. <https://doi.org/10.1111/cod.12330>.
38. Thyssen, J.P.; Engkilde, K.; Lundov, M.D.; Carlsen, B.C.; Menné, T.; Johansen, J.D. Temporal trends of preservative allergy in Denmark (1985–2008). *Contact Dermat.* **2010**, *62*, 102–108. <https://doi.org/10.1111/j.1600-0536.2009.01668.x>.

39. Britton, J.; Wilkinson, S.; English, J.; Gawkrödger, D.; Ormerod, A.; Sansom, J.; Shaw, S.; Statham, B. The British standard series of contact dermatitis allergens: Validation in clinical practice and value for clinical governance. *Br. J. Dermatol.* **2003**, *148*, 259–264. <https://doi.org/10.1046/j.1365-2133.2003.05170.x>.
40. Ford, G.P.; Beck, M.H. Reactions to Quaternium 15, Bronopol and Germall 115 in a standard series. *Contact Dermat.* **1986**, *14*, 271–274. <https://doi.org/10.1111/j.1600-0536.1986.tb05274.x>.
41. Jong, C.T.; Statham, B.N.; Green, C.M.; King, C.M.; Gawkrödger, D.J.; Sansom, J.E.; English, J.S.C.; Wilkinson, S.M.; Ormerod, A.D.; Chowdhury, M. Contact sensitivity to preservatives in the UK, 2004?2005: Results of multicentre study. *Contact Dermat.* **2007**, *57*, 165–168. <https://doi.org/10.1111/j.1600-0536.2007.01181.x>.
42. Shaughnessy, C.N.; Malajian, D.; Belsito, D.V. Cutaneous delayed-type hypersensitivity in patients with atopic dermatitis: Reactivity to topical preservatives. *J. Am. Acad. Dermatol.* **2014**, *70*, 102–107. <https://doi.org/10.1016/j.jaad.2013.08.046>.
43. Katsarma, G.; Gawkrödger, D.J. Suspected fragrance allergy requires extended patch testing to individual fragrance allergens. *Contact Dermat.* **1999**, *41*, 193–197. <https://doi.org/10.1111/j.1600-0536.1999.tb06129.x>.
44. Larsen, W.; Nakayama, H.; Fischer, T.; Elsner, P.; Frosch, P.; Burrows, D.; Jordan, W.; Shaw, S.; Wilkinson, J.; Marks, J.; et al. Fragrance contact dermatitis—A worldwide multicenter investigation (Part III). *Contact Dermat.* **2002**, *46*, 141–144. <https://doi.org/10.1034/j.1600-0536.2002.460302.x>.
45. Tomar, J.; Jain, V.K.; Aggarwal, K.; Dayal, S.; Gupta, S. Contact Allergies to Cosmetics: Testing with 52 Cosmetic Ingredients and Personal Products. *J. Dermatol.* **2005**, *32*, 951–955. <https://doi.org/10.1111/j.1346-8138.2005.tb00880.x>.
46. Spiewak, R.; Samochocki, Z.; Grubska-Suchanek, E.; Czarnobilska, E.; Pasnicki, M.; Czarnecka-Operacz, M.; Bukiel, M.; Cisowska, A.; Jedrzejewska-Jurga, K.; Krakowski, A.; et al. Gallates, as well as hydroperoxides of limonene and linalol are more frequent and relevant sensitizers than any cosmetic ingredient included in the European Baseline Series. *Contact Dermat.* **2016**, *75*, 87.
47. Ochi, H.; Cheng, S.W.N.; Leow, Y.H.; Goon, A.T.J. Contact allergy trends in Singapore—A retrospective study of patch test data from 2009 to 2013. *Contact Dermat.* **2016**, *76*, 49–50. <https://doi.org/10.1111/cod.12629>.
48. Frosch, P.J.; Rastogi, S.C.; Pirker, C.; Brinkmeier, T.; Andersen, K.E.; Bruze, M.; Svedman, C.; Goossens, A.; White, I.R.; Uter, W.; et al. Patch testing with a new fragrance mix—Reactivity to the individual constituents and chemical detection in relevant cosmetic products. *Contact Dermat.* **2005**, *52*, 216–225. <https://doi.org/10.1111/j.0105-1873.2005.00563.x>.
49. Isaksson, M.; Inerot, A.; Lidén, C.; Lindberg, M.; Matura, M.; Möller, H.; Stenberg, B.; Bruze, M. Multicentre patch testing with fragrance mix II and hydroxyisohexyl 3-cyclohexene carboxaldehyde by the Swedish Contact Dermatitis Research Group. *Contact Dermat.* **2014**, *70*, 187–189. <https://doi.org/10.1111/cod.12156>.
50. Krauthaim, A.; Uter, W.; Frosch, P.; Schnuch, A.; Geier, J. Patch testing with fragrance mix II: Results of the IVDK 2005–2008. *Contact Dermat.* **2010**, *63*, 262–269. <https://doi.org/10.1111/j.1600-0536.2010.01753.x>.
51. Ito, A.; Nishioka, K.; Kanto, H.; Yagami, A.; Yamada, S.; Sugiura, M.; Yasunaga, C.; Yoshii, K.; Kobayashi, H.; Adachi, A.; et al. A multi-institutional joint study of contact dermatitis related to hair colouring and perming agents in Japan. *Contact Dermat.* **2017**, *77*, 42–48. <https://doi.org/10.1111/cod.12783>.
52. Thyssen, J.; Linneberg, A.; Menné, T.; Nielsen, N.; Johansen, J. Contact allergy to allergens of the TRUE-test (panels 1 and 2) has decreased modestly in the general population. *Br. J. Dermatol.* **2009**, *161*, 1124–1129. <https://doi.org/10.1111/j.1365-2133.2009.09325.x>.
53. Dotterud, L.K.; Smith-Sivertsen, T. Allergic contact sensitization in the general adult population: A population-based study from Northern Norway. *Contact Dermat.* **2007**, *56*, 10–15. <https://doi.org/10.1111/j.1600-0536.2007.00980.x>.

54. Nielsen, N.H.; Menné, T. Allergic contact sensitization in an unselected Danish population. The Glostrup Allergy Study, Denmark. *Acta Derm. Venereol.* **1992**, *72*, 456–460.
55. Nielsen, N.H.; Linneberg, A.; Menné, T.; Madsen, F.; Frølund, L.; Dirksen, A.; Jørgensen, T. Allergic Contact Sensitization in an Adult Danish Population: Two Cross-sectional Surveys Eight Years Apart (The Copenhagen Allergy Study). *Acta Derm. Venereol.* **2001**, *81*, 31–34. <https://doi.org/10.1080/000155501750208155>.
56. Schäfer, T.; Böhrer, E.; Ruhdorfer, S.; Weigl, L.; Wessner, D.; Filipiak, B.; Wichmann, H.E.; Ring, J. Epidemiology of contact allergy in adults. *Allergy* **2001**, *56*, 1192–1196. <https://doi.org/10.1034/j.1398-9995.2001.00086.x>.
57. Zhao, J.; Li, L.-F. Contact sensitization to cosmetic series of allergens in a general population in Beijing. *J. Cosmet. Dermatol.* **2014**, *13*, 68–71. <https://doi.org/10.1111/jocd.12078>.
58. White, J.M.L.; Gilmour, N.J.; Jeffries, D.; Duangdeeden, I.; Kullavanijaya, P.; Basketter, D.A.; McFadden, J.P. A general population from Thailand: Incidence of common allergens with emphasis on para-phenylenediamine. *Clin. Exp. Allergy* **2007**, *37*, 1848–1853. <https://doi.org/10.1111/j.1365-2222.2007.02846.x>.
